# Supplementary material for: DNA profiling of Hungarian King Béla III and other skeletal remains originating from the Royal Basilica of Székesfehérvár
Source: Springer Nature journal article supplement (doi:10.1007/s12520-018-0609-7), 2018-02-10

## DNA profiling of Hungarian King Béla III and other skeletal remains originating from the Royal Basilica of Székesfehérvár

Judit Olasz<sup>1a</sup>, Verena Seidenberg<sup>2</sup>, Susanne Hummel<sup>2</sup>, Zoltán Szentirmay<sup>1</sup>, György Szabados<sup>3</sup>, Béla Melegh<sup>4</sup>, Miklós Kásler<sup>1</sup>

<sup>1</sup>National Institute of Oncology, <sup>a</sup>Department of Pathogenetics, Ráth Gy. u. 7-9, 1122 Budapest, Hungary; <sup>2</sup>Historic Anthropology and Human Ecology, Johann-Friederich Blumenbach-Institute of Zoology and Anthropology, University of Göttingen, Bürgerstr. 50, 37073 Göttingen, Germany; <sup>3</sup>King St. Stephen Museum, Fő u. 6, 8000 Székesfehérvár, Hungary; <sup>4</sup>Department of Medical Genetics, University of Pécs, Szigeti u. 12, 7624 Pécs, Hungary

Corresponding author: olasz@oncol.hu

### ESM 1 The five graves excavated by János Érdy

Drawn by János Varsányi (1848). Originally published by Érdy (1853).

I: remains of Béla III; II: remains of Anna of Antioch; III: a male skeleton whose identity with II/52 is questioned; IV: the skeleton of an expectant female, only foetal bones remained; V: a crushed skeleton, it has not been preserved.

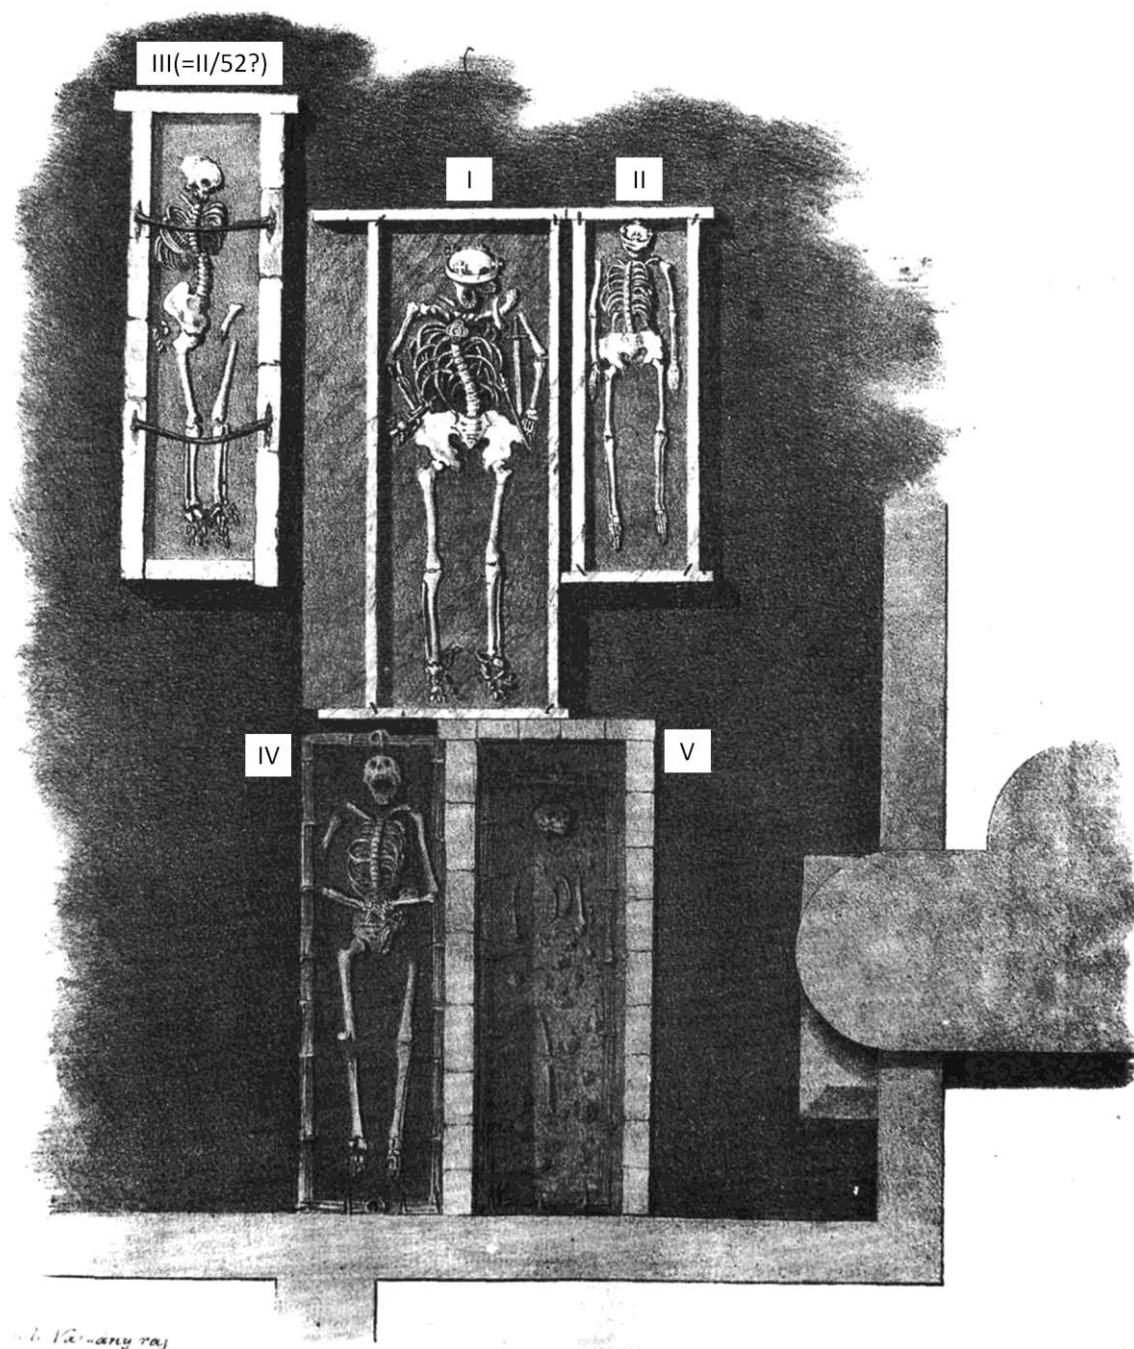

Supplement: 12520_2018_609_MOESM1_ESM.pdf [file 12520_2018_609_MOESM1_ESM.pdf]
