# Supplementary material for: DNA profiling of Hungarian King Béla III and other skeletal remains originating from the Royal Basilica of Székesfehérvár
Source: Springer Nature journal article supplement (doi:10.1007/s12520-018-0609-7), 2018-02-10
Supplement: 12520_2018_609_MOESM2_ESM.pdf [file 12520_2018_609_MOESM2_ESM.pdf]

## **DNA profiling of Hungarian King Béla III and other skeletal remains originating from the Royal Basilica of Székesfehérvár**

Judit Olasz<sup>1a</sup>, Verena Seidenberg<sup>2</sup>, Susanne Hummel<sup>2</sup>, Zoltán Szentirmay<sup>1</sup>, György Szabados<sup>3</sup>, Béla Meleg<sup>4</sup>, Miklós Kásler<sup>1</sup>

<sup>1</sup>National Institute of Oncology, <sup>a</sup>Department of Pathogenetics, Ráth Gy. u. 7-9, 1122 Budapest, Hungary;

<sup>2</sup>Historic Anthropology and Human Ecology, Johann-Friederich Blumenbach-Institute of Zoology and Anthropology, University of Göttingen, Bürgerstr. 50, 37073 Göttingen, Germany; <sup>3</sup>King St. Stephen Museum, Fő u. 6, 8000 Székesfehérvár, Hungary; <sup>4</sup>Department of Medical Genetics, University of Pécs, Szigeti u. 12, 7624 Pécs, Hungary

Corresponding author: olasz@oncol.hu

### **ESM 2 Bone samples used for DNA extraction in the different laboratories**

**Table 1 DNA extractions of the samples – Budapest laboratory.**

| Person                 | Sample ID           | Source     | Extraction no. | Outcome                    |
|------------------------|---------------------|------------|----------------|----------------------------|
| <b>Béla III</b>        | BF1                 | Femur      | Extraction 1   | successful                 |
|                        | BF2                 | Femur      | Extraction 2   | successful                 |
|                        | BF3                 | Femur      | Extraction 3   | successful                 |
|                        | BV1                 | Vertebra   | Extraction 4   | successful                 |
|                        | BV2                 | Vertebra   | Extraction 5   | weak <sup>a</sup>          |
|                        | BMT1                | Metatarsal | Extraction 6   | weak <sup>a</sup>          |
|                        | BMT2                | Metatarsal | Extraction 7   | successful                 |
|                        | BT1                 | Tarsal     | Extraction 8   | successful                 |
|                        | BT2                 | Tarsal     | Extraction 9   | successful                 |
|                        | BT3 <sup>b</sup>    | Tarsal     | Extraction 10  | only mitochondrial results |
| <b>Anna of Antioch</b> | AAC1                | Rib        | Extraction 1   | successful                 |
|                        | AAC2                | Rib        | Extraction 2   | successful                 |
|                        | AAC3                | Rib        | Extraction 3   | successful                 |
| <b>I/3G</b>            | I3GC1               | Rib        | Extraction 1   | successful                 |
|                        | I3GC2               | Rib        | Extraction 2   | successful                 |
|                        | I3GC3               | Rib        | Extraction 3   | successful                 |
|                        | I3GC4               | Rib        | Extraction 4   | successful                 |
| <b>I/4H</b>            | I4HMT1              | Metatarsal | Extraction 1   | successful                 |
|                        | I4HMT2              | Metatarsal | Extraction 2   | successful                 |
|                        | I4HMT3              | Metatarsal | Extraction 3   | successful                 |
|                        | I4HT1               | Tarsal     | Extraction 4   | successful                 |
|                        | I4HT2               | Tarsal     | Extraction 5   | successful                 |
| <b>II/52</b>           | II52C1              | Rib        | Extraction 1   | weak <sup>a</sup>          |
|                        | II52C2              | Rib        | Extraction 2   | weak <sup>a</sup>          |
|                        | II52C3              | Rib        | Extraction 3   | weak <sup>a</sup>          |
|                        | II52C4              | Rib        | Extraction 4   | successful                 |
|                        | II52T1              | Tarsal     | Extraction 5   | successful                 |
|                        | II52T2              | Tarsal     | Extraction 6   | successful                 |
|                        | II52T3              | Tarsal     | Extraction 7   | successful                 |
|                        | II52T4              | Tarsal     | Extraction 8   | successful                 |
|                        | II52T5              | Tarsal     | Extraction 9   | successful                 |
|                        | II52T6 <sup>b</sup> | Tarsal     | Extraction 10  | only mitochondrial results |
|                        | II52F2 <sup>c</sup> | Femur      | Extraction 11  | only mitochondrial results |
| <b>II/53</b>           | II53C1              | Rib        | Extraction 1   | successful                 |
|                        | II53C2              | Rib        | Extraction 2   | successful                 |
|                        | II53C3              | Rib        | Extraction 3   | successful                 |
|                        | II53C4              | Rib        | Extraction 4   | successful                 |
|                        | II53V1              | Vertebra   | Extraction 5   | successful                 |
|                        | II53V2              | Vertebra   | Extraction 6   | successful                 |
| <b>II/54</b>           | II54C1              | Rib        | Extraction 1   | successful                 |
|                        | II54C2              | Rib        | Extraction 2   | successful                 |
|                        | II54C3              | Rib        | Extraction 3   | successful                 |
| <b>II/55</b>           | II55C1              | Rib        | Extraction 1   | successful                 |
|                        | II55C2              | Rib        | Extraction 2   | successful                 |
| <b>II/109</b>          | II55C3              | Rib        | Extraction 3   | successful                 |
|                        | II109C1             | Rib        | Extraction 1   | successful                 |
|                        | II109C2             | Rib        | Extraction 2   | successful                 |
|                        | Mock1               |            | Extraction 1   | negative                   |
|                        | Mock2               |            | Extraction 2   | negative                   |
|                        | Mock3               |            | Extraction 3   | negative                   |
|                        | Mock4               |            | Extraction 4   | negative                   |
|                        | Mock5               |            | Extraction 5   | negative                   |
|                        | Mock6               |            | Extraction 6   | negative                   |
|                        | Mock7               |            | Extraction 7   | negative                   |

<sup>a</sup> we assessed the extracts „weak” when less than the half of the expected markers were called.

<sup>b</sup> the bone powder was treated with additional 0.5% NaOCl for 7 minutes, used only for mitochondrial DNA analysis.

<sup>c</sup> the bone powder was treated with additional 0.8% NaOCl for 10 minutes, used only for mitochondrial DNA analysis

**Table 2 DNA extractions of the samples – Göttingen laboratory.**

| Sample                          | Skeletal element                        | Extract number | Extraction method <sup>c</sup> | Lab abbreviation         |
|---------------------------------|-----------------------------------------|----------------|--------------------------------|--------------------------|
| <b>Béla III.</b>                | Metatarsal                              | Ex 1           | QiaVac MinElute Standard       | HU 3B Mt Ex 1            |
|                                 | Metatarsal                              | Ex 2           | EZ1                            | HU 3B Mt Ex 2            |
|                                 | Metatarsal                              | Ex 3           | QiaVac MinElute Short          | HU 3B Mt Ex 3            |
|                                 | Metatarsal                              | Ex 4           | QiaVac MinElute Organic        | HU 3B Mt Ex 4            |
|                                 | Metatarsal                              | Ex 5           | QiaVac MinElute Short          | HU 3B Mt Ex 5            |
|                                 | Metatarsal                              | Ex 6           | QiaVac MinElute Organic        | HU 3B Mt Ex 6            |
|                                 | Tarsal                                  | Ex 7           | QiaVac MinElute Organic        | HU 3B Ta Ex 7            |
| <b>Anna of Antioch</b>          | Rib                                     | Ex 1           | QiaVac MinElute Standard       | HU AA Co Ex 1            |
|                                 | Rib                                     | Ex 2           | EZ1                            | HU AA Co Ex 2            |
|                                 | Rib                                     | Ex 3           | QiaVac MinElute Short          | HU AA Co Ex 3            |
|                                 | Rib                                     | Ex 4           | QiaVac MinElute Organic        | HU AA Co Ex 4            |
|                                 | Rib                                     | Ex 5           | QiaVac MinElute Short          | HU AA Co Ex 5            |
|                                 | Vertebra                                | Ex 6           | QiaVac MinElute Organic        | HU AA Ve Ex 6            |
|                                 | Femur                                   | Ex 8           | QiaVac MinELute Organic        | HU AA Fe Ex 8            |
|                                 | <b>II/52 (Unmarked)<br/>3. skeleton</b> | Tarsal         | Ex 1                           | QiaVac MinElute Standard |
| Tarsal                          |                                         | Ex 2           | EZ1                            | HU 52 Ta Ex 2            |
| Tarsal                          |                                         | Ex 3           | QiaVac MinElute Short          | HU 52 Ta Ex 3            |
| Tarsal                          |                                         | Ex 4           | QiaVac MinElute Organic        | HU 52 Ta Ex 4            |
| Femur                           |                                         | Ex 5           | QiaVac MinElute Organic        | HU 52 Fe Ex 5            |
| Tarsal 2                        |                                         | Ex 6           | QiaVac MinElute Organic        | HU 52 Ta2 Ex 6           |
| <b>Fetus</b>                    | Vertebra                                | Ex 1           | QiaVac MinElute Standard       | HU FS Ve Ex 1            |
| <b>II/53 →<br/>7. skeleton</b>  | Sternum                                 | Ex 1           | QiaVac MinElute Standard       | HU 53 St Ex 1            |
|                                 | Sternum                                 | Ex 2           | EZ1                            | HU 53 St Ex 2            |
|                                 | Sternum                                 | Ex 3           | QiaVac MinElute Short          | HU 53 St Ex 3            |
|                                 | Sternum                                 | Ex 4           | QiaVac MinElute Organic        | HU 53 St Ex 4            |
|                                 | Rib                                     | Ex 5           | QiaVac MinElute Organic        | HU 53 Co Ex 5            |
| <b>II/109 →<br/>8. skeleton</b> | Rib                                     | Ex 1           | QiaVac MinElute Standard       | HU 109 Co Ex 1           |
|                                 | Rib                                     | Ex 2           | EZ1                            | HU 109 Co Ex 2           |
|                                 | Rib                                     | Ex 3           | QiaVac MinElute Short          | HU 109 Co Ex 3           |
|                                 | Rib                                     | Ex 4           | QiaVac MinElute Organic        | HU 109 Co Ex 4           |
|                                 | Vertebra                                | Ex 5           | QiaVac MinElute Organic        | HU 109 Ve Ex 5           |
| <b>II/54 →<br/>9. skeleton</b>  | Rib                                     | Ex 1           | QiaVac MinElute Standard       | HU 54 Co Ex 1            |
|                                 | Rib                                     | Ex 2           | EZ1                            | HU 54 Co Ex 2            |
|                                 | Rib                                     | Ex 3           | QiaVac MinElute Short          | HU 54 Co Ex 3            |
|                                 | Rib                                     | Ex 4           | QiaVac MinElute Organic        | HU 54 Co Ex 4            |
|                                 | Femur                                   | Ex 5           | QiaVac MinElute Organic        | HU 54 Fe Ex 5            |
| <b>II/55 →<br/>10. skeleton</b> | Rib                                     | Ex 1           | QiaVac MinElute Standard       | HU 55 Co Ex 1            |
|                                 | Rib                                     | Ex 2           | EZ1                            | HU 55 Co Ex 2            |
|                                 | Rib                                     | Ex 3           | QiaVac MinElute Short          | HU 55 Co Ex 3            |
|                                 | Rib                                     | Ex 4           | QiaVac MinElute Organic        | HU 55 Co Ex 4            |
|                                 | Rib                                     | Ex 5           | QiaVac MinElute Short          | HU 55 Co Ex 5            |
|                                 | Rib                                     | Ex 6           | QiaVac MinElute Organic        | HU 55 Co Ex 6            |
|                                 | Femur                                   | Ex 7           | QiaVac MinElute Organic        | HU 55 Fe Ex 7            |
| <b>I/3 G →<br/>5. skeleton</b>  | Tarsal                                  | Ex 1           | QiaVac MinElute Standard       | HU 3G Ta Ex 1            |
|                                 | Tarsal                                  | Ex 2           | EZ1                            | HU 3G Ta Ex 2            |
|                                 | Tarsal                                  | Ex 3           | QiaVac MinElute Short          | HU 3G Ta Ex 3            |
|                                 | Rib                                     | Ex 4           | QiaVac MinElute Organic        | HU 3G Co Ex 4            |
|                                 | Femur                                   | Ex 5           | QiaVac MinElute Organic        | HU 3G Fe Ex 5            |
| <b>I/4 H →<br/>6. skeleton</b>  | Metatarsal                              | Ex 1           | QiaVac MinElute Standard       | HU 4H Mt Ex 1            |
|                                 | Metatarsal                              | Ex 2           | EZ1                            | HU 4H Mt Ex 2            |
|                                 | Metatarsal                              | Ex 3           | QiaVac MinElute Short          | HU 4H Mt Ex 3            |
|                                 | Metatarsal                              | Ex 4           | QiaVac MinElute Organic        | HU 4H Mt Ex 4            |
|                                 | Tarsal                                  | Ex 5           | QiaVac MinElute Organic        | HU 4H Ta Ex 5            |

<sup>c</sup> in the cases of Béla III and Anna of Antioch the methods "QiaVac MinElute Standard" and "EZ1" resulted in not successfully amplifiable DNA extracts (HU 3B Mt Ex 1-2 and HU AA Co Ex 1-2). Therefore, new extraction methods "QiaVac MinElute Short" and "QiaVac MinElute Organic" were developed (see ESM2). All other DNA extracts revealed successful amplification.
