# Supplementary material for: DNA profiling of Hungarian King Béla III and other skeletal remains originating from the Royal Basilica of Székesfehérvár
Source: Springer Nature journal article supplement (doi:10.1007/s12520-018-0609-7), 2018-02-10
Supplement: 12520_2018_609_MOESM4_ESM.pdf [file 12520_2018_609_MOESM4_ESM.pdf]

## DNA profiling of Hungarian King Béla III and other skeletal remains originating from the Royal Basilica of Székesfehérvár

Judit Olasz<sup>1a</sup>, Verena Seidenberg<sup>2</sup>, Susanne Hummel<sup>2</sup>, Zoltán Szentirmay<sup>1</sup>, György Szabados<sup>3</sup>, Béla Melegh<sup>4</sup>, Miklós Kásler<sup>1</sup>

<sup>1</sup>National Institute of Oncology, <sup>a</sup>Department of Pathogenetics, Ráth Gy. u. 7-9, 1122 Budapest, Hungary; <sup>2</sup>Historic Anthropology and Human Ecology, Johann-Friedrich Blumenbach-Institute of Zoology and Anthropology, University of Göttingen, Bürgerstr. 50, 37073 Göttingen, Germany; <sup>3</sup>King St. Stephen Museum, Fő u. 6, 8000 Székesfehérvár, Hungary; <sup>4</sup>Department of Medical Genetics, University of Pécs, Szigeti u. 12, 7624 Pécs, Hungary

Corresponding author: olasz@oncol.hu

### ESM 4 Self-designed PCR primers used for the autosomal and Y-chromosomal STR amplifications in the Budapest and the Göttingen laboratories

#### 1. Autosomal STR loci, primer sequences and concentrations in tetraplex and simplex PCRs used by the Budapest laboratory

| STR locus | Primer sequence (5'→3')                                                                         | Fluorescent dye | μM in tetraplex | μM in simplex |
|-----------|-------------------------------------------------------------------------------------------------|-----------------|-----------------|---------------|
| D2S441    | CTG TGG CTC ATC TAT GAA AAC TT<br>TAA GTG GCT GTG GTG TTA TGA T                                 | VIC             | 0.16<br>0.16    | 0.4<br>0.4    |
| vWA       | CCC TAG TGG ATG ATA AGA ATA ATC AGT ATG<br>GGA CAG ATG ATA AAT ACA TAG GAT GGA TGG <sup>a</sup> | VIC             | 0.26<br>0.26    |               |
| D10S1248  | TTA ATG AAT TGA ACA AAT GAG TGA G<br>ACA ACT CTG GTT GTA TTG TCT TCA T                          | NED             | 0.26<br>0.26    |               |
| TH01      | GTG ATT CCC ATT GGC CTG TTC<br>TCC TGT GGG CTG AAA AGC TC                                       | NED             | 0.14<br>0.14    |               |
| D3S1358   | ACT GCA GTC CAA TCT GGG T<br>ATG AAA TCA ACA GAG GCT TGC <sup>b</sup>                           | 6-FAM           |                 | 0.4<br>0.4    |

<sup>a</sup>Urquhart et al. 1995; <sup>b</sup>Krenke et al. 2002

2. Amplified loci with primer sequences of the decaplex Y-miniSTR kit used by the Göttingen laboratory

| Y-STR locus | Primer sequence (5'→3')                                                           | Fluorescent dye | μM in PCR    |
|-------------|-----------------------------------------------------------------------------------|-----------------|--------------|
| DYS389      | ATC CAA CTC TCA TCT GTA TTA TCT ATG T<br>GAC TGC TAG ATA AAT AGA TAG ATTG ATA GAG | 6-FAM           | 0.4<br>0.4   |
| DYS19       | CTG AGT TTC TGT TAT AGT GTT TTT TAA TAT AT<br>ATG GGT TAA GGA GAG TGT CAC TAT AT  | 6-FAM           | 0.15<br>0.15 |
| DYS438      | GAA TAG TTG AAC GGT AAA CAG TAT ATT T<br>GAG TGA AAC TCC ATT TCA AAT AGA A        | HEX             | 0.2<br>0.2   |
| DYS385      | AGA GAA AGA GGA AAG AGA AAG AAA G<br>AAA AAT AAT CTA TCT ATT CCA ATT ACA TAG TC   | HEX             | 0.4<br>0.4   |
| DYS439      | GGA GAC AGA TAG ATG ATA AAT AGA AGA T<br>ACC ATC ATC TCT TTA CTT ATA CTT TCT ATC  | NED             | 0.1<br>0.1   |
| DYS393      | GTG GTC TTC TAC TTG TGT CAA TAC<br>AAA ACT CAA GTC CAA AAA ATG AGG                | NED             | 0.15<br>0.15 |
| DYS390      | CAT TTT GGT ACC CCA TAA TAT ATT C<br>AGC AAT GTG TAT ACT CAG AAA CAA G            | NED             | 0.2<br>0.2   |
| DYS392      | CTA CCA ATC CCA TTC CTT AGT AAA<br>AAG GAA AAC AAA TTT TTT TCT TGT A              | ROX             | 0.2<br>0.2   |
| DYS391      | CTC TTG TGT ATC TAT TCA TTC AAT CAT A<br>AAA TTG CCA TAG AGG GAT AGG TAG          | ROX             | 0.2<br>0.2   |
| DYS437      | AGT GAT CCT CCT ACC TCA GTC TC<br>ACC ACA GAT AAA TAT CAT TCA TAG ATA A           | ROX             | 0.25<br>0.25 |
