# Supplementary material for: DNA profiling of Hungarian King Béla III and other skeletal remains originating from the Royal Basilica of Székesfehérvár
Source: Springer Nature journal article supplement (doi:10.1007/s12520-018-0609-7), 2018-02-10
Supplement: 12520_2018_609_MOESM5_ESM.pdf [file 12520_2018_609_MOESM5_ESM.pdf]

## DNA profiling of Hungarian King Béla III and other skeletal remains originating from the Royal Basilica of Székesfehérvár

Judit Olasz<sup>1a</sup>, Verena Seidenberg<sup>2</sup>, Susanne Hummel<sup>2</sup>, Zoltán Szentirmay<sup>1</sup>, György Szabados<sup>3</sup>, Béla Melegh<sup>4</sup>, Miklós Kásler<sup>1</sup>

<sup>1</sup>National Institute of Oncology, <sup>a</sup>Department of Pathogenetics, Ráth Gy. u. 7-9, 1122 Budapest, Hungary; <sup>2</sup>Historic Anthropology and Human Ecology, Johann-Friedrich Blumenbach-Institute of Zoology and Anthropology, University of Göttingen, Bürgerstr. 50, 37073 Göttingen, Germany; <sup>3</sup>King St. Stephen Museum, Fő u. 6, 8000 Székesfehérvár, Hungary; <sup>4</sup>Department of Medical Genetics, University of Pécs, Szigeti u. 12, 7624 Pécs, Hungary

Corresponding author: olasz@oncol.hu

### ESM 5 Cycling conditions for the amplicons of the mitochondrial control region

| Mitochondrial regions                                                       | Cycling conditions                                                     |
|-----------------------------------------------------------------------------|------------------------------------------------------------------------|
| 16094-16248<br>16197-16433<br>16363-16509<br>16450-52<br>109-293<br>402-619 | 98°C 30 sec<br>45x: 98°C 5 sec, 57°C 12 sec, 72°C 10 sec<br>72°C 1 min |
| 15989-16152                                                                 | 98°C 30 sec<br>45x: 98°C 5 sec, 52°C 20 sec, 72°C 12 sec<br>72°C 1 min |
| 16533-180                                                                   | 98°C 30 sec<br>45x: 98°C 5 sec, 60°C 12 sec, 72°C 10 sec<br>72°C 1 min |
| 220-389                                                                     | 98°C 30 sec<br>45x: 98°C 5 sec, 52°C 30 sec, 72°C 15 sec<br>72°C 1 min |
| 317-460                                                                     | 98°C 30 sec<br>45x: 98°C 5 sec, 55°C 10 sec, 72°C 10 sec<br>72°C 1 min |
