# Supplementary material for: DNA profiling of Hungarian King Béla III and other skeletal remains originating from the Royal Basilica of Székesfehérvár
Source: Springer Nature journal article supplement (doi:10.1007/s12520-018-0609-7), 2018-02-10
Supplement: 12520_2018_609_MOESM7_ESM.pdf [file 12520_2018_609_MOESM7_ESM.pdf]

**DNA profiling of Hungarian King Béla III and other skeletal remains originating from the Royal Basilica of Székesfehérvár**

Judit Olasz<sup>1a</sup>, Verena Seidenberg<sup>2</sup>, Susanne Hummel<sup>2</sup>, Zoltán Szentirmay<sup>1</sup>, György Szabados<sup>3</sup>, Béla Melegh<sup>4</sup>, Miklós Kásler<sup>1</sup>

<sup>1</sup>National Institute of Oncology, <sup>a</sup>Department of Pathogenetics, Ráth Gy. u. 7-9, 1122 Budapest, Hungary; <sup>2</sup>Historic Anthropology and Human Ecology, Johann-Friederich Blumenbach-Institute of Zoology and Anthropology, University of Göttingen, Bürgerstr. 50, 37073 Göttingen, Germany; <sup>3</sup>King St. Stephen Museum, Fő u. 6, 8000 Székesfehérvár, Hungary; <sup>4</sup>Department of Medical Genetics, University of Pécs, Szigeti u. 12, 7624 Pécs, Hungary

Corresponding author: olasz@oncol.hu

**ESM 7 Data for each run of the Y-chromosomal STR amplifications**

Y-chromosomal STR amplification results – Budapest

|                  | Samples          | DYS456    | DYS389 I  | DYS390    | DYS389 II | DYS458    | DYS19     | DYS385       | DYS393    | DYS391    | DYS439    | DYS635    | DYS392    | GATA H4   | DYS437    | DYS438    | DYS448    |
|------------------|------------------|-----------|-----------|-----------|-----------|-----------|-----------|--------------|-----------|-----------|-----------|-----------|-----------|-----------|-----------|-----------|-----------|
| <b>Run</b>       | <b>Béla III.</b> |           |           |           |           |           |           |              |           |           |           |           |           |           |           |           |           |
| 25.11.2014       | BF1              | 16/17     | 13        |           | 33        | 15        |           | (13)/(14)    | 13        | 11        | 10        |           |           | 12/13     | 14        |           |           |
| 25.11.2014       | BF2              | 16        | 13        | 25        |           | 15        |           | (11)/13      | 13        | 11        | 10        |           |           | 13        |           |           |           |
| 22.01.2015       | BV2              |           | 13        |           |           | 15        |           |              | 12/13     |           |           |           |           |           |           |           |           |
| 22.01.2015       | BMT1             | 16        |           |           |           | 15        |           |              |           |           |           |           |           |           | 14        |           |           |
| 22.01.2015       | BMT2             | 16        |           |           |           |           |           | 11           | 13        |           |           |           |           |           |           |           |           |
| 20.03.2015       | BF3              |           | 12/13     |           |           | 15        |           | 13           | 13        |           |           |           |           |           |           |           |           |
| 20.03.2015       | BT1              | 16        | 13        | 25        |           | 15        | 16        | 11,13        | 13        | 11        | 10        | 23        | 11        | 13        | 14        | 11        | 20        |
| 20.03.2015       | BT1              | 16        | 13        | 25        | 33        | 15        | 16        | 11,13        | 13        | 11        | 10        | 23        | 11        | 13        | 14        | 11        | 20        |
| <b>Consensus</b> |                  | <b>16</b> | <b>13</b> | <b>25</b> | <b>33</b> | <b>15</b> | <b>16</b> | <b>11,13</b> | <b>13</b> | <b>11</b> | <b>10</b> | <b>23</b> | <b>11</b> | <b>13</b> | <b>14</b> | <b>11</b> | <b>20</b> |

|                  | Samples      | DYS456    | DYS389 I  | DYS390    | DYS389 II | DYS458      | DYS19     | DYS385       | DYS393    | DYS391    | DYS439    | DYS635    | DYS392    | GATA H4   | DYS437    | DYS438    | DYS448    |
|------------------|--------------|-----------|-----------|-----------|-----------|-------------|-----------|--------------|-----------|-----------|-----------|-----------|-----------|-----------|-----------|-----------|-----------|
| <b>Run</b>       | <b>I/3 G</b> |           |           |           |           |             |           |              |           |           |           |           |           |           |           |           |           |
| 25.11.2014       | I3GC1        |           | 13/14     |           |           | 19.2        |           |              | 12        | 10        | 11        | 21        |           | 11        |           |           |           |
| 25.11.2014       | I3GC2        |           | (14)      |           |           | 19.2        |           | 12           | 12        | 10        |           | 21        | (13)      |           | 14        |           | 21        |
| 09.12.2014       | I3GC3        | 15        | 14        | 23        | 30        | 19.2        | 15        | 12,(17)      | 12        | 10        | 11        | 21        | 13        | 11        | 14        | 10        | 21        |
| 09.12.2014       | I3GC3        | 15        | 14        | 23        | 30        | 19.2        | 15        | 12           | 12        | 10        |           |           |           | 11        | 14        | 10        |           |
| 15.06.2015       | I3GC4        | 15        | 14        | 23        |           | 19.2        | 15        | 12,17        | 12        | 10        | 11        | 21        | 13        | 11        | 14        | 10        | (22)      |
| <b>Consensus</b> |              | <b>15</b> | <b>14</b> | <b>23</b> | <b>30</b> | <b>19.2</b> | <b>15</b> | <b>12,17</b> | <b>12</b> | <b>10</b> | <b>11</b> | <b>21</b> | <b>13</b> | <b>11</b> | <b>14</b> | <b>10</b> | <b>21</b> |

|                  | Samples      | DYS456    | DYS389 I  | DYS390      | DYS389 II | DYS458    | DYS19     | DYS385       | DYS393    | DYS391    | DYS439    | DYS635    | DYS392    | GATA H4   | DYS437    | DYS438    | DYS448    |
|------------------|--------------|-----------|-----------|-------------|-----------|-----------|-----------|--------------|-----------|-----------|-----------|-----------|-----------|-----------|-----------|-----------|-----------|
| <b>Run</b>       | <b>I/4 H</b> |           |           |             |           |           |           |              |           |           |           |           |           |           |           |           |           |
| 25.11.2014       | I4HMT1       | 14        | 13        |             |           | 17        | 14        |              |           |           |           | 23        |           | 11        | 15        | 12        | 19        |
| 09.12.2014       | I4HMT2       |           | 13        |             |           | 17        |           |              | 13        |           |           | 23        |           |           | 15        |           |           |
| 09.12.2014       | I4HMT2       |           | 13        |             | 29        |           | 14        | (11),16      | 13        | 10        |           | 23        |           |           |           |           |           |
| 22.01.2015       | I4HMT3       | 16        | 13        |             |           | 17        |           | 11,16        | 13        | 10        | 11        | 23        |           | 11        |           | 12        |           |
| 22.01.2015       | I4HMT3       | 16        | 13        |             |           | 17        |           |              | 13        |           |           |           |           |           | 15        |           | 19        |
| 22.01.2015       | I4HMT3       | 16        |           |             |           |           |           |              |           |           |           |           | 13        |           | 15        |           |           |
| 15.06.2015       | I4HT1        | 16        | 13        | 24          | 29        | 17        | 14        | 11,16        | 13        | 10        | 11        | 23        | 13        | 11        | 15        | 12        | 19        |
| <b>Consensus</b> |              | <b>16</b> | <b>13</b> | <b>(24)</b> | <b>29</b> | <b>17</b> | <b>14</b> | <b>11,16</b> | <b>13</b> | <b>10</b> | <b>11</b> | <b>23</b> | <b>13</b> | <b>11</b> | <b>15</b> | <b>12</b> | <b>19</b> |

Run result in brackets means that the peak height of the fragment did not reach the threshold of 20 RFU. Consensus result in brackets means that the result occurred only once.

|                  | Samples      | DYS456    | DYS389 I  | DYS390    | DYS389 II | DYS458    | DYS19       | DYS385       | DYS393    | DYS391    | DYS439    | DYS635      | DYS392 | GATA H4   | DYS437    | DYS438    | DYS448 |
|------------------|--------------|-----------|-----------|-----------|-----------|-----------|-------------|--------------|-----------|-----------|-----------|-------------|--------|-----------|-----------|-----------|--------|
| <b>Run</b>       | <b>II/52</b> |           |           |           |           |           |             |              |           |           |           |             |        |           |           |           |        |
| 09.12.2014       | II52C1       |           |           |           |           | 15        |             |              |           |           |           |             |        |           | 14        |           |        |
| 09.12.2014       | II52C2       |           |           |           |           |           |             |              |           |           |           |             |        |           |           | 11        |        |
| 09.12.2014       | II52C2       |           |           | (25)      |           |           |             |              |           |           |           |             |        |           |           |           |        |
| 03.02.2015       | II52C3       |           |           |           |           |           |             |              | 13        |           | 10        |             |        |           |           |           |        |
| 03.02.2015       | II52T1       | 16        |           |           |           | 15        |             | 11           | 13        | 11        |           |             |        | 13        | 14        |           |        |
| 03.02.2015       | II52T1       | 16        |           |           |           |           | 16          |              | 13        | 11        | 10        |             |        | 13        | 14        | 11        |        |
| 20.03.2015       | II52T2       | 16        | 13        |           |           | 15        |             |              | 13        |           |           |             |        | 13        |           | 11        |        |
| 15.06.2015       | II52T3       | 16        | 13        | 25        |           | 17        |             | 11,13        |           |           | 10        | 23          |        | 13        | 14/15     | 11        |        |
| 15.06.2015       | II52C4       | 16        |           |           |           |           |             | 13           | 13        | 11        | 10        |             |        | 12        |           |           |        |
| <b>Consensus</b> |              | <b>16</b> | <b>13</b> | <b>25</b> |           | <b>15</b> | <b>(16)</b> | <b>11,13</b> | <b>13</b> | <b>11</b> | <b>10</b> | <b>(23)</b> |        | <b>13</b> | <b>14</b> | <b>11</b> |        |

|                  | Samples      | DYS456    | DYS389 I  | DYS390    | DYS389 II   | DYS458    | DYS19     | DYS385       | DYS393    | DYS391    | DYS439    | DYS635    | DYS392    | GATA H4   | DYS437    | DYS438    | DYS448    |
|------------------|--------------|-----------|-----------|-----------|-------------|-----------|-----------|--------------|-----------|-----------|-----------|-----------|-----------|-----------|-----------|-----------|-----------|
| <b>Run</b>       | <b>II/53</b> |           |           |           |             |           |           |              |           |           |           |           |           |           |           |           |           |
| 25.11.2014       | II53C1       |           |           |           |             |           | 13        |              |           |           |           | 22        |           | 11        | 14        |           |           |
| 09.12.2014       | II53C2       | 15        |           | 23        |             |           |           |              | 13        |           |           |           |           | 11        |           | 10        |           |
| 09.12.2014       | II53C2       | 15        |           |           |             | 15        |           |              | 13        |           |           |           |           | 11        |           |           |           |
| 09.12.2014       | II53C3       | 15        |           |           |             | 15        |           |              |           | 10        |           |           |           | 11        |           | 10        | 20        |
| 15.01.10 22      | II53C4       | 15        | 13        | 23        |             | 15        |           | (19)         | 13        |           | 12        |           |           | 8/11      |           | 10        |           |
| 22.01.2015       | II53C4       | 15        | 13        | (23)      | 30          | 15        |           | 15           | 13        | 10        |           | 22        | 11        | 11        | 14        |           |           |
| 03.02.2015       | II53V1       | 15/17     | 13        | 23        |             | 15        | 13        | 14/15/19     | 13        | 10        | 12        | 22        |           | 11        | 14        | 10        | 20        |
| 15.06.2015       | II53C5       | 15        | 13        | 23        |             | 15        | 13        |              | 13        | 10        |           | 22        | 11        | 11        | 14        | 10        |           |
| 15.06.2015       | II53C5       | 14/15     | 13        |           |             | 15        |           |              | 13        | 10        | 12        |           |           | 11        | 14        |           |           |
| <b>Consensus</b> |              | <b>15</b> | <b>13</b> | <b>23</b> | <b>(30)</b> | <b>15</b> | <b>13</b> | <b>15,19</b> | <b>13</b> | <b>10</b> | <b>12</b> | <b>22</b> | <b>11</b> | <b>11</b> | <b>14</b> | <b>10</b> | <b>20</b> |

|                  | Samples      | DYS456    | DYS389 I  | DYS390    | DYS389 II | DYS458    | DYS19     | DYS385       | DYS393    | DYS391    | DYS439    | DYS635    | DYS392    | GATA H4   | DYS437    | DYS438    | DYS448    |
|------------------|--------------|-----------|-----------|-----------|-----------|-----------|-----------|--------------|-----------|-----------|-----------|-----------|-----------|-----------|-----------|-----------|-----------|
| <b>Run</b>       | <b>II/54</b> |           |           |           |           |           |           |              |           |           |           |           |           |           |           |           |           |
| 09.12.2014       | II54C1       | 17        | 13        | 25        | 30        | 15        |           | 11,14        | 13        | 10        |           | 23        | 11        | 12        | 14        | 11        | 20        |
| 09.12.2014       | II54C1       | 17        | 13        | 25        | 30        | 15        | 16        | 11,14        | 13        | 10        | 10        | 23        | 11        | 12        | 14        | 11        | 20        |
| 20.03.2015       | II54C2       | 17        | 13        | 25        | 30        | 15        | 16        | 11,14        | 13        | 10        | 10        | 23        | 11        | 12        | 14        | 11        | 20        |
| <b>Consensus</b> |              | <b>17</b> | <b>13</b> | <b>25</b> | <b>30</b> | <b>15</b> | <b>16</b> | <b>11,14</b> | <b>13</b> | <b>10</b> | <b>10</b> | <b>23</b> | <b>11</b> | <b>12</b> | <b>14</b> | <b>11</b> | <b>20</b> |

|                  | Samples      | DYS456    | DYS389 I  | DYS390    | DYS389 II | DYS458    | DYS19     | DYS385       | DYS393    | DYS391    | DYS439    | DYS635    | DYS392    | GATA H4   | DYS437    | DYS438    | DYS448    |
|------------------|--------------|-----------|-----------|-----------|-----------|-----------|-----------|--------------|-----------|-----------|-----------|-----------|-----------|-----------|-----------|-----------|-----------|
| <b>Run</b>       | <b>II/55</b> |           |           |           |           |           |           |              |           |           |           |           |           |           |           |           |           |
| 09.12.2014       | II55C1       | 15        | 13        | 25        | 29        | 18        | 14        | 11,14        | 13        | 10        | 13        | 23        | 14        | 11        | 16        | 12        | 19        |
| 09.12.2014       | II55C1       | 15        | 13        | 25        | 29        | 18        | 14        | 11,14        | 13        | 10        | 13        | 23        |           | 11        | 16        | 12        | 19        |
| 03.02.2015       | II55C2       | 15        | 13        | 25        | 29        | 18        | 14        | 11,14        | 13        | 10        | 13        | 23        | 14        | 11        | 16        | 12        | 19        |
| <b>Consensus</b> |              | <b>15</b> | <b>13</b> | <b>25</b> | <b>29</b> | <b>18</b> | <b>14</b> | <b>11,14</b> | <b>13</b> | <b>10</b> | <b>13</b> | <b>23</b> | <b>14</b> | <b>11</b> | <b>16</b> | <b>12</b> | <b>19</b> |

Run result in brackets means that the peak height of the fragment did not reach the threshold of 20 RFU. Consensus result in brackets means that the result occurred only once.

The following mock extractions were used for the Y-chromosomal STR amplification reactions

|            | Sample      | DYS456 | DYS389 I | DYS390 | DYS389 II | DYS458 | DYS19 | DYS385 | DYS393 | DYS391 | DYS439 | DYS635 | DYS392 | GATA H4 | DYS437 | DYS438 | DYS448 |
|------------|-------------|--------|----------|--------|-----------|--------|-------|--------|--------|--------|--------|--------|--------|---------|--------|--------|--------|
| <b>Run</b> | <b>Mock</b> |        |          |        |           |        |       |        |        |        |        |        |        |         |        |        |        |
| 25.11.2014 | Mock 1      |        |          |        |           |        |       |        |        |        |        |        |        |         |        |        |        |
| 09.12.2014 | Mock 2      |        |          |        |           |        |       |        |        |        |        |        |        |         |        |        |        |
| 22.01.2015 | Mock 3      |        |          |        |           |        |       |        |        |        |        |        |        |         |        |        |        |
| 03.02.2015 | Mock 4      |        |          |        |           |        |       |        |        |        |        |        |        |         |        |        |        |
| 20.03.2015 | Mock 5      |        |          |        |           |        |       |        |        |        |        |        |        |         |        |        |        |
| 15.06.2015 | Mock 6      |        |          |        |           |        |       |        |        |        |        |        |        |         |        |        |        |
|            |             |        |          |        |           |        |       |        |        |        |        |        |        |         |        |        |        |

Mock extractions and No Template Control (NTC) reactions for each batch revealed no successful amplification.

Y-chromosomal STR amplification results – Göttingen

| Individual (Sample)                           | Extract no.        | µl Ex in PCR        | DYS19        | DYS385        | DYS389 I        | DYS389 II        | DYS390        | DYS391        | DYS392        | DYS393        | DYS437        | DYS438        | DYS439        | PCR #        | Run        |
|-----------------------------------------------|--------------------|---------------------|--------------|---------------|-----------------|------------------|---------------|---------------|---------------|---------------|---------------|---------------|---------------|--------------|------------|
| Bela III.<br>(HU 3B Mt)                       | Ex 6               | 1                   | -            | 11-13         | 13              | -                | 25            | 11            | -             | -             | 14            | 11            | 10            | 10a          | 2015.07.02 |
|                                               | Ex 6               | 3                   | 16           | 11-13         | 13              | -                | -             | 11            | -             | 12-13         | 14            | 11            | 10            | 10b          | 2015.07.02 |
|                                               | Ex 6               | 3                   | 16           | 11-13         | 13              | 33               | 25            | 11            | 11            | 13            | 14            | 11            | 10            | 11a          | 2015.07.08 |
|                                               | Ex 6               | 4                   | -            | 11-13         | 13              | -                | -             | 11            | 11            | 13            | 14            | 11            | 10            | 11b          | 2015.07.08 |
| <b>Haplotype</b>                              |                    |                     | <b>16</b>    | <b>11-13</b>  | <b>13</b>       | <b>(33)</b>      | <b>25</b>     | <b>11</b>     | <b>11</b>     | <b>13</b>     | <b>14</b>     | <b>11</b>     | <b>10</b>     |              |            |
| <b>Individual (Sample)</b>                    | <b>Extract no.</b> | <b>µl Ex in PCR</b> | <b>DYS19</b> | <b>DYS385</b> | <b>DYS389 I</b> | <b>DYS389 II</b> | <b>DYS390</b> | <b>DYS391</b> | <b>DYS392</b> | <b>DYS393</b> | <b>DYS437</b> | <b>DYS438</b> | <b>DYS439</b> | <b>PCR #</b> | <b>Run</b> |
| Anna of Antioch<br>(HU AA Co)                 | Ex 4               | 3                   | -            | ---           | -               | -                | -             | -             | -             | -             | -             | -             | -             | 10           | 2015.07.02 |
| <b>Haplotype</b>                              |                    |                     |              |               |                 |                  |               |               |               |               |               |               |               |              |            |
| <b>Individual (Sample)</b>                    | <b>Extract no.</b> | <b>µl Ex in PCR</b> | <b>DYS19</b> | <b>DYS385</b> | <b>DYS389 I</b> | <b>DYS389 II</b> | <b>DYS390</b> | <b>DYS391</b> | <b>DYS392</b> | <b>DYS393</b> | <b>DYS437</b> | <b>DYS438</b> | <b>DYS439</b> | <b>PCR #</b> | <b>Run</b> |
| I/3 G 5. skeleton<br>(HU 3G Co)               | Ex 4               | 1                   | -            | 12--          | -               | -                | 23            | 10            | -             | -             | 14            | -             | 11            | 10a          | 2015.07.02 |
|                                               | Ex 4               | 3                   | ((15))       | ((12))--      | 14              | 30               | -             | 10            | -             | 12            | 14            | -             | -             | 10b          | 2015.07.02 |
|                                               | Ex 4               | 3                   | 15           | 12-17         | 14              | 30               | 23            | 10            | 13            | 12            | 14            | ((10))        | 11            | 11a          | 2015.07.08 |
|                                               | Ex 4               | 4                   | 15           | 12-17         | 14              | 30               | 23            | 10            | 13            | 12            | 14            | 10            | 11            | 11b          | 2015.07.08 |
| <b>Haplotype</b>                              |                    |                     | <b>15</b>    | <b>12-17</b>  | <b>14</b>       | <b>30</b>        | <b>23</b>     | <b>10</b>     | <b>13</b>     | <b>12</b>     | <b>14</b>     | <b>10</b>     | <b>11</b>     |              |            |
| <b>Individual (Sample)</b>                    | <b>Extract no.</b> | <b>µl Ex in PCR</b> | <b>DYS19</b> | <b>DYS385</b> | <b>DYS389 I</b> | <b>DYS389 II</b> | <b>DYS390</b> | <b>DYS391</b> | <b>DYS392</b> | <b>DYS393</b> | <b>DYS437</b> | <b>DYS438</b> | <b>DYS439</b> | <b>PCR #</b> | <b>Run</b> |
| I/4 H 6. skeleton<br>(HU 4H Mt)               | Ex 4               | 1                   | 14           | 11-16         | 13              | 29               | 24            | 10            | 13            | 13            | 15            | 12            | 11            | 10a          | 2015.07.02 |
|                                               | Ex 4               | 3                   | 14           | 11-16         | 13              | 29               | 24            | 10            | 13            | 13            | 15            | 12            | 11            | 10b          | 2015.07.02 |
|                                               | Ex 4               | 3                   | 14           | 11-16         | 13              | 29               | 24            | 10            | 13            | 13            | 15            | 12            | 11            | 11a          | 2015.07.08 |
|                                               | Ex 4               | 4                   | 14           | 11-16         | 13              | 29               | 24            | 10            | 13            | 13            | 15            | 12            | 11            | 11b          | 2015.07.08 |
| <b>Haplotype</b>                              |                    |                     | <b>14</b>    | <b>11-16</b>  | <b>13</b>       | <b>29</b>        | <b>24</b>     | <b>10</b>     | <b>13</b>     | <b>13</b>     | <b>15</b>     | <b>12</b>     | <b>11</b>     |              |            |
| <b>Individual (Sample)</b>                    | <b>Extract no.</b> | <b>µl Ex in PCR</b> | <b>DYS19</b> | <b>DYS385</b> | <b>DYS389 I</b> | <b>DYS389 II</b> | <b>DYS390</b> | <b>DYS391</b> | <b>DYS392</b> | <b>DYS393</b> | <b>DYS437</b> | <b>DYS438</b> | <b>DYS439</b> | <b>PCR #</b> | <b>Run</b> |
| II/52 (Unmarked)<br>3. skeleton (HU<br>52 Ta) | Ex 4               | 1                   | -            | -             | -               | -                | 25            | 11            | -             | -             | -             | 11            | -             | 10a          | 2015.07.02 |
|                                               | Ex 4               | 3                   | 16           | (11)-13       | 13              | -                | 25            | 11            | -             | 13            | 14            | -             | -             | 10b          | 2015.07.02 |
|                                               | Ex 4               | 3                   | 16           | 11-13         | 13              | -                | -             | 11            | 11            | 13            | 14            | 11            | 10            | 11a          | 2015.07.08 |
|                                               | Ex 4               | 4                   | 16           | 11-13         | 13              | 13-(14)          | 33            | 25            | 11            | 11            | 13            | 14            | 11            | 10           | 11b        |
| <b>Haplotype</b>                              |                    |                     | <b>16</b>    | <b>11-13</b>  | <b>13</b>       | <b>(33)</b>      | <b>25</b>     | <b>11</b>     | <b>11</b>     | <b>13</b>     | <b>14</b>     | <b>11</b>     | <b>10</b>     |              |            |

| Individual (Sample)            | Extract no. | µl Ex in PCR | DYS19     | DYS385       | DYS389 I  | DYS389 II | DYS390    | DYS391    | DYS392    | DYS393    | DYS437    | DYS438    | DYS439    | PCR # | Run        |
|--------------------------------|-------------|--------------|-----------|--------------|-----------|-----------|-----------|-----------|-----------|-----------|-----------|-----------|-----------|-------|------------|
| II/53 7. skeleton (HU 53 St)   | Ex 4        | 1            | -         | 19--         | -         | -         | -         | -         | -         | 13        | 14        | 10        | -         | 10a   | 2015.07.02 |
|                                | Ex 4        | 3            | 13        | ---          | 12-13     | 29-30     | 25        | 10-11     | 11        | 13        | 14        | -         | 10        | 10b   | 2015.07.02 |
|                                | Ex 4        | 3            | 15        | 11-(14)-(19) | 13        | 30        | 23        | 10-(11)   | 11        | 13        | 14-(15)   | 10-(11)   | 12        | 11a   | 2015.07.08 |
|                                | Ex 4        | 4            | 13        | 14-15-(19)   | 13        | 30        | 23-25     | 10-11     | 11        | 13        | 14        | 10-(11)   | 12-13     | 11b   | 2015.07.08 |
| <b>Haplotype</b>               |             |              |           |              |           |           |           |           |           |           |           |           |           |       |            |
| Individual (Sample)            | Extract no. | µl Ex in PCR | DYS19     | DYS385       | DYS389 I  | DYS389 II | DYS390    | DYS391    | DYS392    | DYS393    | DYS437    | DYS438    | DYS439    | PCR # | Run        |
| II/54 9. skeleton (HU 54 Co)   | Ex 4        | 1            | -         | ---          | 13        | 30        | -         | 10        | 11        | 13        | 14        | 11        | 10        | 10a   | 2015.07.02 |
|                                | Ex 4        | 3            | 16        | 11-14        | 13        | 30        | 25        | 10        | -         | -         | 14        | -         | 10        | 10b   | 2015.07.02 |
|                                | Ex 4        | 3            | 16        | 11-14        | 13        | 30        | 25        | 10        | 11        | 13        | 14        | 11        | 10        | 11a   | 2015.07.08 |
|                                | Ex 4        | 4            | 16        | 11-14        | 13        | 30        | 25        | 10        | 11        | 13        | 14        | 11        | 10        | 11b   | 2015.07.08 |
|                                |             |              | <b>16</b> | <b>11-14</b> | <b>13</b> | <b>30</b> | <b>25</b> | <b>10</b> | <b>11</b> | <b>13</b> | <b>14</b> | <b>11</b> | <b>10</b> |       |            |
| Individual (Sample)            | Extract no. | µl Ex in PCR | DYS19     | DYS385       | DYS389 I  | DYS389 II | DYS390    | DYS391    | DYS392    | DYS393    | DYS437    | DYS438    | DYS439    | PCR # | Run        |
| II/55 10. skeleton (HU 55 Co)  | Ex 6        | 1            | 14        | 11--         | 13        | 29        | 25        | 10        | (14)      | 13        | -         | 12        | -         | 10a   | 2015.07.02 |
|                                | Ex 6        | 3            | 14        | 11-14        | 13        | 29        | 25        | 10        | ((14))    | 13        | 16        | ((12))    | 13        | 10b   | 2015.07.02 |
|                                | Ex 6        | 3            | 14        | 11-14        | 13        | 29        | 25        | 10        | 14        | 13        | 16        | 12        | 13        | 11a   | 2015.07.08 |
|                                | Ex 6        | 4            | 14        | 11-14        | 13        | 29        | 25        | 10        | 14        | 13        | 16        | 12        | 13        | 11b   | 2015.07.08 |
| <b>Haplotype</b>               |             |              | <b>14</b> | <b>11-14</b> | <b>13</b> | <b>29</b> | <b>25</b> | <b>10</b> | <b>14</b> | <b>13</b> | <b>16</b> | <b>12</b> | <b>13</b> |       |            |
| Individual (Sample)            | Extract no. | µl Ex in PCR | DYS19     | DYS385       | DYS389 I  | DYS389 II | DYS390    | DYS391    | DYS392    | DYS393    | DYS437    | DYS438    | DYS439    | PCR # | Run        |
| II/109 8. skeleton (HU 109 Co) | Ex 4        | 3            | -         | ---          | -         | -         | -         | -         | -         | -         | -         | -         | -         | 10    | 2015.07.02 |
| <b>Haplotype</b>               |             |              |           |              |           |           |           |           |           |           |           |           |           |       |            |

Negative controls for the PCRs revealed no amplification.
