# Supplementary material for: DNA profiling of Hungarian King Béla III and other skeletal remains originating from the Royal Basilica of Székesfehérvár
Source: Springer Nature journal article supplement (doi:10.1007/s12520-018-0609-7), 2018-02-10
Supplement: 12520_2018_609_MOESM8_ESM.pdf [file 12520_2018_609_MOESM8_ESM.pdf]

**DNA profiling of Hungarian King Béla III and other skeletal remains originating from the Royal Basilica of Székesfehérvár**

Judit Olasz<sup>1a</sup>, Verena Seidenberg<sup>2</sup>, Susanne Hummel<sup>2</sup>, Zoltán Szentirmay<sup>1</sup>, György Szabados<sup>3</sup>, Béla Melegh<sup>4</sup>, Miklós Kásler<sup>1</sup>  
<sup>1</sup>National Institute of Oncology, <sup>a</sup>Department of Pathogenetics, Ráth Gy. u. 7-9, 1122 Budapest, Hungary; <sup>2</sup>Historic Anthropology and Human Ecology, Johann-Friederich Blumenbach-Institute of Zoology and Anthropology, University of Göttingen, Bürgerstr. 50, 37073 Göttingen, Germany; <sup>3</sup>King St. Stephen Museum, Fő u. 6, 8000 Székesfehérvár, Hungary; <sup>4</sup>Department of Medical Genetics, University of Pécs, Szigeti u. 12, 7624 Pécs, Hungary

Corresponding author: olasz@oncol.hu

**ESM 8 Consensus autosomal STR genotypes of the other investigated individuals and detailed data for each run**

| STR loci          | Consensus genotypes <sup>a</sup> |         |           |         |         |           |           |
|-------------------|----------------------------------|---------|-----------|---------|---------|-----------|-----------|
|                   | Fetus <sup>b</sup>               | I/3G    | I/4H      | II/53   | II/54   | II/55     | II/109    |
| <b>Amelogenin</b> | X/X                              | X/Y     | X/Y       | X/Y     | X/Y     | X/Y       | X/X       |
| <b>D1S1656</b>    | N/A                              | 13/17.3 | 11/17.3   | 15/(11) | 15/17   | 15.3/16   | 12/16     |
| <b>D2S441</b>     | N/A                              | 11/11   | 10/11     | 12/14   | 10/11   | 11/11     | 11/14     |
| <b>D2S1338</b>    | N/A                              | 24/25   | 18/18     | 20/21   | 21/23   | 17/24     | 18/19     |
| <b>D3S1358</b>    | N/A                              | 14/17   | 15/19     | 14/-    | 16/17   | 14/16     | 15/18     |
| <b>D5S818</b>     | 12/13                            | 11/12   | 10/12     | 12/-    | 9/11    | 11/12     | 11/11     |
| <b>D7S820</b>     | N/A                              | 8/12    | 11/12     | 10/12   | 11/12   | 9/10      | 8/10      |
| <b>D8S1179</b>    | N/A                              | 13/13   | 12/12     | 14/14   | 11/14   | 13/13     | 12/15     |
| <b>D9S1120</b>    | N/A                              | 16/16   | 16/16     | 16/16   | 15/16   | 15/16     | 15/16     |
| <b>D10S1248</b>   | N/A                              | 14/15   | 13/13     | 13/13   | 13/15   | 13/14     | 14/15     |
| <b>D12S391</b>    | N/A                              | 15/21   | 18/18     | -/-     | 19/23   | 17/22     | 17/23     |
| <b>D13S317</b>    | (10)/12                          | 8/13    | 8/13      | 12/12   | 11/13   | 11/13     | 9/11      |
| <b>D16S539</b>    | N/A                              | 11/11   | 12/14     | 12/13   | 11/12   | 12/13     | 10/13     |
| <b>D18S51</b>     | (17)/19                          | 19/23   | 14/14     | 14/15   | 14/17   | 12/16     | 14/15     |
| <b>D19S433</b>    | N/A                              | 13/14   | 14/16     | 13/14   | 13/14   | 13/14     | 13/13     |
| <b>D21S11</b>     | 30.2/-                           | 25/31.2 | 30/32.2   | 26/28   | 29/29   | 30/31     | 31/33.2   |
| <b>D22S1045</b>   | N/A                              | 15/16   | 15/16     | 14/15   | 14/15   | 12/15     | 15/16     |
| <b>CSF1PO</b>     | N/A                              | 11/12   | 11/12     | 10/10   | 12/12   | 11/13     | 10/13     |
| <b>FGA</b>        | 20/25                            | 19/20   | 19/25     | 20/22   | 21/23   | 22/23     | 22/22     |
| <b>SE33</b>       | N/A                              | 18/29.2 | 22.2/28.2 | -/-     | 18/28.2 | 26.2/34.2 | 19.2/29.2 |
| <b>TH01</b>       | 6/9.3                            | 7/9     | 6/7       | 8/10    | 6/9.3   | 6/9.3     | 8/9       |
| <b>vWA</b>        | N/A                              | 14/19   | 17/18     | 18/19   | 14/16   | 16/16     | 14/19     |

<sup>a</sup>Consensus profiles were defined from the consensus data of the Göttingen and Budapest laboratories; <sup>b</sup>only heptaplex STR reactions were performed because of the limited sample material; N/A: not applicable.

Consensus result in brackets means that the result occurred only once.

## Autosomal STR Results – Budapest

| Run              |           | Sample          | Amel       | D13S317     | D7S820       | D2S1338      | D21S11         | D16S539      | D18S51       | CSF1PO       | FGA          | vWA          | TH01       | D2S441         | D22S1045     | D12S391      | D10S1248     | D1S1656        | D3S1358 | D19S433 | D8S1179 |  |
|------------------|-----------|-----------------|------------|-------------|--------------|--------------|----------------|--------------|--------------|--------------|--------------|--------------|------------|----------------|--------------|--------------|--------------|----------------|---------|---------|---------|--|
|                  |           | <b>Béla III</b> |            |             |              |              |                |              |              |              |              |              |            |                |              |              |              |                |         |         |         |  |
| 18.11.2014       | Minifiler | BF1             | X/Y        | 9/13        | 10/11        | 17           | 32.2           | 11/12        | 13/16        | 11/12        | 21           |              |            |                |              |              |              |                |         |         |         |  |
| 18.11.2014       | Minifiler | BV1             | X          | 12/13       |              | 17           |                | 12           | 13           | (11)/12      | 21           |              |            |                |              |              |              |                |         |         |         |  |
| 28.11.2014       | Minifiler | BF2             | X/Y        | 9/13        | 10/11        | 17           | 31             | 11/12        | 12/13/16     | 11/12        | 21           |              |            |                |              |              |              |                |         |         |         |  |
| 28.11.2014       | Minifiler | BV2             |            | 13          | 11           |              |                |              | 13           |              | 21           |              |            |                |              |              |              |                |         |         |         |  |
| 11.12.2014       | Minifiler | BMT1            |            | 13          |              | 16           |                | 12           | 13           | 12           |              |              |            |                |              |              |              |                |         |         |         |  |
| 11.12.2014       | Minifiler | BMT2            | Y          | 9/13        | 8/10/11      | 17           |                | 11/12        | 13           | 11/12        |              |              |            |                |              |              |              |                |         |         |         |  |
| 17.03.2015       | Minifiler | BF3             | X/Y        | 9/13        | 10/11        | 17/19/23     | 31/32.2        | 11/13        | 13/16        | 11/12        | 21           |              |            |                |              |              |              |                |         |         |         |  |
| 17.03.2015       | Minifiler | BT1             | X/Y        | 9/13        | 10/11        | 17           | 31/32.2        | 11/12        | 13/16        | 11/12        | 21           |              |            |                |              |              |              |                |         |         |         |  |
| 12.06.2015       | Hexaplex  | BF3             | X/Y        |             |              |              |                |              |              |              |              |              | 7/9        | 11/11.3        | 16           |              |              |                |         |         |         |  |
| 12.06.2015       | Hexaplex  | BT1             | X/Y        |             |              |              |                |              |              |              |              |              | 7/9        | 11/11.3        | 15/16        | 18/19        | 13           | 13/17.3        |         |         |         |  |
| 07.07.2015       | Tetraplex | BT1             |            |             |              |              |                |              |              |              |              | 17           |            | 11/11.3        |              |              | 13           |                |         |         |         |  |
| 10.08.2015       | ESSplex   | BT1             | X/Y        |             |              | 17           | 32.2           | 11/12        | 13/16        |              | 21           | 17           | 7/9        | 11/11.3        | 15/16        | 18/19        | 13           | 13/17.3        | 15/17   | 15/16.2 | 13      |  |
| 10.08.2015       | ESSplex   | BT2             | X/Y        |             |              | 17           | 31             | 11/12        | 13/16        |              | 21           | 17           | 7/9        | 11/11.3        | 15/16        | 18/19        | 13           | 13/17.3        | 15/17   | 15/16.2 |         |  |
| <b>Consensus</b> |           |                 | <b>X/Y</b> | <b>9/13</b> | <b>10/11</b> | <b>17/17</b> | <b>31/32.2</b> | <b>11/12</b> | <b>13/16</b> | <b>11/12</b> | <b>21/21</b> | <b>17/17</b> | <b>7/9</b> | <b>11/11.3</b> | <b>15/16</b> | <b>18/19</b> | <b>13/13</b> | <b>13/17.3</b> | 15/17   | 15/16.2 | (13)/   |  |

| Run              |           | Sample              | Amel       | D13S317        | D7S820      | D2S1338      | D21S11         | D16S539        | D18S51       | CSF1PO       | FGA          | vWA          | TH01           | D2S441       | D22S1045         | D12S391      | D10S1248       | D1S1656    | D3S1358 | D19S433 | D8S1179 |  |
|------------------|-----------|---------------------|------------|----------------|-------------|--------------|----------------|----------------|--------------|--------------|--------------|--------------|----------------|--------------|------------------|--------------|----------------|------------|---------|---------|---------|--|
|                  |           | <b>Anna Antioch</b> |            |                |             |              |                |                |              |              |              |              |                |              |                  |              |                |            |         |         |         |  |
| 11.12.2014       | Minifiler | AAC1                | X          | 10/11          | 8/10        | 20/27        | 29/30          | 10/11          | 16/18        | 12           | 21/23        |              |                |              |                  |              |                |            |         |         |         |  |
| 11.12.2014       | Minifiler | AAC1                |            | (10)/11        | 10          |              | 30             |                | 16/18        | 12           | 23           |              |                |              |                  |              |                |            |         |         |         |  |
| 05.02.2015       | Minifiler | AAC2                | X          | 11             | 8           | 20/27        |                | 10             | 16/18        | 12           | 21/23        |              |                |              |                  |              |                |            |         |         |         |  |
| 05.02.2015       | Minifiler | AAC2                | X          | 11             | 10          |              | 30             | 10             | 14/16/18     |              |              |              |                |              |                  |              |                |            |         |         |         |  |
| 29.06.2015       | Hexaplex  | AAC3                | X          |                |             |              |                |                |              |              |              |              | 7/9.3          | 10/14        | 11               | 18           | 15             | 12         |         |         |         |  |
| 10.08.2015       | ESSplex   | AAC3                | X          |                |             |              |                |                |              |              |              | 14           | (7)/9.3        | 10           | 17               |              | 14/15          | 12         |         | 15      |         |  |
| <b>Consensus</b> |           |                     | <b>X/X</b> | <b>(10)/11</b> | <b>8/10</b> | <b>20/27</b> | <b>(29)/30</b> | <b>10/(11)</b> | <b>16/18</b> | <b>12/12</b> | <b>21/23</b> | <b>(14)/</b> | <b>(7)/9.3</b> | <b>10/14</b> | <b>(11)/(17)</b> | <b>(18)/</b> | <b>(14)/15</b> | <b>12/</b> |         | (15)/   |         |  |

| Run        |           | Sample      | Amel       | D13S317     | D7S820      | D2S1338      | D21S11         | D16S539      | D18S51       | CSF1PO       | FGA          | vWA                | TH01       | D2S441       | D22S1045     | D12S391        | D10S1248     | D1S1656        | D3S1358 | D19S433   | D8S1179 |  |
|------------|-----------|-------------|------------|-------------|-------------|--------------|----------------|--------------|--------------|--------------|--------------|--------------------|------------|--------------|--------------|----------------|--------------|----------------|---------|-----------|---------|--|
|            |           | <b>I3 G</b> |            |             |             |              |                |              |              |              |              |                    |            |              |              |                |              |                |         |           |         |  |
| 18.11.2014 | Minifiler | I3GC1       | X/Y        | 8           | 8/12        | 24           | 31.2           | 11           | 19/23        | 11/12        | 19/20        |                    |            |              |              |                |              |                |         |           |         |  |
| 28.11.2014 | Minifiler | I3GC1       | X          | 8/13        |             | 24           |                | 11/(13)      | 19/23        | 11           | 19/20        |                    |            |              |              |                |              |                |         |           |         |  |
| 28.11.2014 | Minifiler | I3GC2       | X/Y        | 8/13        | 8/12        | 24/25        | 25/31.2        | 11           | 19/23/24     | 11/12        | (19)/20      |                    |            |              |              |                |              |                |         |           |         |  |
| 11.12.2014 | Minifiler | I3GC3       | X/Y        | 8/13        | 8/12        | 24/25        | 25/31.2        | 11           | 19/23        | 11/12        | 19/20        |                    |            |              |              |                |              |                |         |           |         |  |
| 11.12.2014 | Tetraplex | I3GC3       |            |             |             |              |                |              |              |              |              | 14/19.2            | 7/9        | 11           |              |                | 14/15        |                |         |           |         |  |
| 29.06.2015 | Hexaplex  | I3GC4       | X/Y        |             |             |              |                |              |              |              |              |                    | 7/9        | 11           | 15/16        | 15/21          | 14           | 13/17.3        |         |           |         |  |
| 25.09.2015 | ESSplex   | I3GC4       | X/Y        |             |             |              | 31.2           | 11           | 19           |              |              |                    |            | 11           | 15           | 15             | 14           | 13/17.3        | (8)/17  | 13/14     | 13      |  |
| 25.09.2015 | ESSplex   | I3GC4       | X/Y        |             |             |              |                | 11           | 19/23        |              |              |                    | 7/9        | 11           | 16           | 15             | 14/15        | 17.3           |         |           | 13      |  |
|            |           | <b>Cons</b> | <b>X/Y</b> | <b>8/13</b> | <b>8/12</b> | <b>24/25</b> | <b>25/31.2</b> | <b>11/11</b> | <b>19/23</b> | <b>11/12</b> | <b>19/20</b> | <b>(14)/(19.2)</b> | <b>7/9</b> | <b>11/11</b> | <b>15/16</b> | <b>15/(21)</b> | <b>14/15</b> | <b>13/17.3</b> | (17)/   | (13)/(14) | (13)/   |  |

Minifiler: AmpFISTR Minifiler PCR Amplification Kit (Applied Biosystems); Hexaplex: Investigator Hexaplex ESS Kit (Qiagen); ESSplex: Investigator ESSplex Plus Kit (Qiagen).

Run result in brackets means that the peak height of the fragment did not reach the threshold of 20 RFU. Consensus result in brackets means that the result occurred only once.

| Run        |           | Sample      | Amel       | D13S317     | D7S820       | D2S1338      | D21S11         | D16S539      | D18S51       | CSF1PO       | FGA          | vWA          | TH01       | D2S441       | D22S1045     | D12S391      | D10S1248     | D1S1656        | D3S1358   | D19S433   | D8S1179 |
|------------|-----------|-------------|------------|-------------|--------------|--------------|----------------|--------------|--------------|--------------|--------------|--------------|------------|--------------|--------------|--------------|--------------|----------------|-----------|-----------|---------|
|            |           | <b>I4 H</b> |            |             |              |              |                |              |              |              |              |              |            |              |              |              |              |                |           |           |         |
| 18.11.2014 | Minifiler | I4HMT1      | X/Y        | 8/13        | 11/12        | 18           | 30/32.2        | 14           | 14           | 11/12        | 19           |              |            |              |              |              |              |                |           |           |         |
| 28.11.2014 | Minifiler | I4HMT1      | X/Y        | 8           | 11/12/14     | 18           | 30             | 12/14        | 14           | 11/12        | 19/25        |              |            |              |              |              |              |                |           |           |         |
| 28.11.2014 | Minifiler | I4HMT2      | X/Y        | 8/13        | 11           | 18           | 30/32.2        | 12/13/14     | 14           | 11/12        | 19/25        |              |            |              |              |              |              |                |           |           |         |
| 12.06.2015 | Hexaplex  | I4HT1       | X/Y        |             |              |              |                |              |              |              |              |              | 6/7        | 10/11        | 15/16        | 18           | 13           | 11/17.3        |           |           |         |
| 07.07.2015 | Tetraplex | I4HT1       |            |             |              |              |                |              |              |              |              | 17/18        | 6/7        | 10/11        |              |              | 13           |                |           |           |         |
| 25.09.2015 | ESSplex   | I4HT2       | X/Y        |             |              | 18           | 30/32.2        | 12/14        | 14           |              | 19/25        | 17/18        | 6/7        | 10/11        | 15/16        | 18           | 13           | 11/17.3        | 15/19     | 14/16     | 12      |
|            |           | <b>Cons</b> | <b>X/Y</b> | <b>8/13</b> | <b>11/12</b> | <b>18/18</b> | <b>30/32.2</b> | <b>12/14</b> | <b>14/14</b> | <b>11/12</b> | <b>19/25</b> | <b>17/18</b> | <b>6/7</b> | <b>10/11</b> | <b>15/16</b> | <b>18/18</b> | <b>13/13</b> | <b>11/17.3</b> | (15)/(19) | (14)/(16) | (12)    |

| Run        |           | Sample       | Amel       | D13S317     | D7S820     | D2S1338      | D21S11         | D16S539      | D18S51       | CSF1PO      | FGA          | vWA          | TH01         | D2S441       | D22S1045     | D12S391        | D10S1248     | D1S1656        | D3S1358 | D19S433 | D8S1179 |
|------------|-----------|--------------|------------|-------------|------------|--------------|----------------|--------------|--------------|-------------|--------------|--------------|--------------|--------------|--------------|----------------|--------------|----------------|---------|---------|---------|
|            |           | <b>I/52</b>  |            |             |            |              |                |              |              |             |              |              |              |              |              |                |              |                |         |         |         |
| 18.11.2014 | Minifiler | I/52C1       |            |             |            |              | 32.2           |              |              | 11          |              |              |              |              |              |                |              |                |         |         |         |
| 28.11.2014 | Minifiler | I/52C2       | X          |             |            |              |                | 11           | (18)         | 11          | (21)/22      |              |              |              |              |                |              |                |         |         |         |
| 05.02.2015 | Minifiler | I/52T1       | X          | 8/13        | 9          |              | 32.2           | 10/11        | 13/17        | 9/11        | 21           |              |              |              |              |                |              |                |         |         |         |
| 17.03.2015 | Minifiler | I/52T2       | X/Y        | 8/13        |            |              | 30/32.2        | 10/11        | 17           | 9/11/12     | 21/25        |              |              |              |              |                |              |                |         |         |         |
| 05.02.2015 | Minifiler | I/52C3       | Y          | 8           |            |              |                |              | 13           |             |              |              |              |              |              |                |              |                |         |         |         |
| 05.02.2015 | Minifiler | I/52C4       |            | 8/13        | 9          |              |                | 10/11        | 17           | 9           |              |              |              |              |              |                |              |                |         |         |         |
| 30.06.2015 | Minifiler | I/52T2       | X          | 8           | 8/9        | 20           | 30             | 11           |              | 9/11        |              |              |              |              |              |                |              |                |         |         |         |
| 30.06.2015 | Minifiler | I/52T3       | X/Y        | 8/13        | 8/9        | 20/25        | 32.2           | 10/11        | 13           | 9/11/12     | 25           |              |              |              |              |                |              |                |         |         |         |
| 30.06.2015 | Minifiler | I/52T3       | Y          | 8/13        | 9          | 20           | 30             | 8/10         | 13/17        | 9/11        | 21           |              |              |              |              |                |              |                |         |         |         |
| 12.06.2015 | Hexaplex  | I/52T2       | X/Y        |             |            |              |                |              |              |             |              |              | 9/9.3        | 10           |              | 17             | 13           | 17.3           |         |         |         |
| 12.06.2015 | Hexaplex  | I/52T2       | Y          |             |            |              |                |              |              |             |              |              | 9/9.3        | 10           | 17           |                |              | 17.3           |         |         |         |
| 12.06.2015 | Hexaplex  | I/52T3       | X/Y        |             |            |              |                |              |              |             |              |              | 9/9.3        | 10           | 15           | 17             | 13           | 12             |         |         |         |
| 12.06.2015 | Hexaplex  | I/52T3       | X/Y        |             |            |              |                |              |              |             |              |              | 8.3/9.3      | 10           | 15/17        |                | 13           | 12             |         |         |         |
| 29.06.2015 | Hexaplex  | I/52C4       | X/Y        |             |            |              |                |              |              |             |              |              | 9/9.3        | 10           | 15           |                | 13           |                |         |         |         |
| 29.06.2015 | Hexaplex  | I/52T5       | X/Y        |             |            |              |                |              |              |             |              |              | 9.3          | 10           | 15/16/17     | 18             |              | 12/17.3        |         |         |         |
| 10.08.2015 | ESSplex   | I/52T2       | X/Y        |             |            |              | 30             | 10/11        | 19           |             |              |              | 9/9.3        | 10           | 15/17        |                | 12/13        | 12             |         | 13      |         |
| 25.09.2015 | ESSplex   | I/52T5       | X/Y        |             |            |              |                | 10/11        | 13/17        |             |              | 16/17        | 9/9.3        | 10           | 15/17        |                | 13           | 12             | 14      | 13      |         |
| 25.09.2015 | ESSplex   | I/52T5       | X          |             |            |              |                | 10/11        | 13           |             | 21           |              | 9/9.3        | 10/14        | 15/17        |                | 13           |                | 14      | 13      |         |
| 07.07.2015 | Tetraplex | I/52T4       |            |             |            |              |                |              |              |             |              | 16/17        |              | 10           |              |                | 13           |                |         |         |         |
| 07.07.2015 | D2S441    | I/52T4       |            |             |            |              |                |              |              |             |              |              |              | 10           |              |                |              |                |         |         |         |
| 03.03.2016 | D3S1358   | I/52C2       |            |             |            |              |                |              |              |             |              |              |              |              |              |                |              |                | 14      |         |         |
| 03.03.2016 | D3S1358   | I/52C4       |            |             |            |              |                |              |              |             |              |              |              |              |              |                |              |                | 14      |         |         |
| 03.03.2016 | D3S1358   | I/52T2       |            |             |            |              |                |              |              |             |              |              |              |              |              |                |              |                | 14      |         |         |
|            |           | <b>Cons.</b> | <b>X/Y</b> | <b>8/13</b> | <b>8/9</b> | <b>20/25</b> | <b>30/32.2</b> | <b>10/11</b> | <b>13/17</b> | <b>9/11</b> | <b>21/25</b> | <b>16/17</b> | <b>9/9.3</b> | <b>10/10</b> | <b>15/17</b> | <b>17/(18)</b> | <b>13/13</b> | <b>12/17.3</b> | 14/14   | 13/13   |         |

Minifiler: AmpFISTR Minifiler PCR Amplification Kit (Applied Biosystems); Hexaplex: Investigator Hexaplex ESS Kit (Qiagen); ESSplex: Investigator ESSplex Plus Kit (Qiagen).

Run result in brackets means that the peak height of the fragment did not reach the threshold of 20 RFU. Consensus result in brackets means that the result occurred only once.

| Run         |           | Sample       | Amel       | D13S317      | D7S820       | D2S1338      | D21S11       | D16S539      | D18S51       | CSF1PO       | FGA          | vWA            | TH01        | D2S441       | D22S1045       | D12S391 | D10S1248 | D1S1656        | D3S1358 | D19S433 | D8S1179 |
|-------------|-----------|--------------|------------|--------------|--------------|--------------|--------------|--------------|--------------|--------------|--------------|----------------|-------------|--------------|----------------|---------|----------|----------------|---------|---------|---------|
|             |           | <b>II/53</b> |            |              |              |              |              |              |              |              |              |                |             |              |                |         |          |                |         |         |         |
| 18.11.2014  | Minifiler | II53C1       | X/Y        | 12           | 12           | 20           | 26/28        | 12/13        | 14/15        | 10/11        | (20)/22      |                |             |              |                |         |          |                |         |         |         |
| 28.11.2014. | Minifiler | II53C1       | <b>X/Y</b> |              | 12           | 20/21        | 26/28        | 12/13        | 14/15        | 10           | 20/22        |                |             |              |                |         |          |                |         |         |         |
| 28.11.2014  | Minifiler | II53C2       | <b>X/Y</b> | 12           | 10/12        | 20/21/25     | 28           | 12/13        | 14           | 10           | 20/22        |                |             |              |                |         |          |                |         |         |         |
| 17.03.2015  | Minifiler | II53C3       | X/Y        | 12           | 10/12        | 20/21        | 26/28        | 12/13        | 14/15        | 10           | 20/22        |                |             |              |                |         |          |                |         |         |         |
| 17.03.2015  | Minifiler | II53V1       | X/Y        | 12           | 10/12        | 20/21        | 26/28        | 12/13        | 14/15        | 10           | 20/22        |                |             |              |                |         |          |                |         |         |         |
| 07.07.2015  | Tetraplex | II53V1       |            |              |              |              |              |              |              |              |              | 18/19          | 10          | 12/14        |                |         |          | 11/13          |         |         |         |
| 15.09.25.   | ESSplex   | II53C4       | X/Y        |              |              |              |              | 12/13        |              |              |              |                | 10          | 14           |                |         |          | 13             |         |         | 14      |
| 15.09.25.   | ESSplex   | II53C4       | X/Y        |              |              |              | 26           | 13           | 14/15        |              |              | 18             | 8/10        | 12/14        | 14/15          |         |          | 13             |         | 9/14    |         |
| 15.09.25.   | ESSplex   | II53V2       | X/Y        |              |              |              |              | 12           | 14           |              | 22           |                | 8/10        | 12/14        | 14             |         |          | 13             |         | 14      |         |
|             |           | <b>Cons.</b> | <b>X/Y</b> | <b>12/12</b> | <b>10/12</b> | <b>20/21</b> | <b>26/28</b> | <b>12/13</b> | <b>14/15</b> | <b>10/10</b> | <b>20/22</b> | <b>18/(19)</b> | <b>8/10</b> | <b>12/14</b> | <b>14/(15)</b> |         |          | <b>(11)/13</b> |         | (9)/14  | (14)/   |

| Run         |           | Sample       | Amel       | D13S317      | D7S820       | D2S1338      | D21S11       | D16S539      | D18S51       | CSF1PO       | FGA          | vWA          | TH01         | D2S441       | D22S1045     | D12S391      | D10S1248     | D1S1656      | D3S1358 | D19S433 | D8S1179 |
|-------------|-----------|--------------|------------|--------------|--------------|--------------|--------------|--------------|--------------|--------------|--------------|--------------|--------------|--------------|--------------|--------------|--------------|--------------|---------|---------|---------|
|             |           | <b>II/54</b> |            |              |              |              |              |              |              |              |              |              |              |              |              |              |              |              |         |         |         |
| 11.12.2014. | Minifiler | II54C1       | X/Y        | 11/13        | 11/12        | 21/23        | 29           | 11/12        | 14/17        | 12           | 21/23        |              |              |              |              |              |              |              |         |         |         |
| 17.03.2015  | Minifiler | II54C2       | X/Y        | 11/13        | 11/12        | 21/23        | 29           | 11/12        | 14/17        | 12           | 21/23        |              |              |              |              |              |              |              |         |         |         |
| 10.08.2015  | ESSplex   | II54C2       | X/Y        |              |              | 21/23        |              | 11/12        | 14/17        |              | 21/23        | 14/16        | 6/9.3        | 10/11        | 14/15        | 19/23        | 13/15        | 15/17        | 16/17   | 13/14   | 11/14   |
| 10.08.2015  | ESSplex   | II54C3       | X/Y        |              |              | 21/23        | 29           | 11/12        | 14/17        |              |              | 14/16        | 6/9.3        | 10/11        | 14/15        | 19/23        | 13/15        | 15/17        | 16/17   | 13/14   | 11/14   |
|             |           | <b>Cons.</b> | <b>X/Y</b> | <b>11/13</b> | <b>11/12</b> | <b>21/23</b> | <b>29/29</b> | <b>11/12</b> | <b>14/17</b> | <b>12/12</b> | <b>21/23</b> | <b>14/16</b> | <b>6/9.3</b> | <b>10/11</b> | <b>14/15</b> | <b>19/23</b> | <b>13/15</b> | <b>15/17</b> | 16/17   | 13/14   | 11/14   |

| Run         |           | Sample       | Amel       | D13S317      | D7S820      | D2S1338      | D21S11       | D16S539      | D18S51       | CSF1PO       | FGA          | vWA            | TH01         | D2S441       | D22S1045       | D12S391      | D10S1248     | D1S1656        | D3S1358 | D19S433 | D8S1179 |
|-------------|-----------|--------------|------------|--------------|-------------|--------------|--------------|--------------|--------------|--------------|--------------|----------------|--------------|--------------|----------------|--------------|--------------|----------------|---------|---------|---------|
|             |           | <b>II/55</b> |            |              |             |              |              |              |              |              |              |                |              |              |                |              |              |                |         |         |         |
| 11.12.2014  | Minifiler | II55C1       | X/Y        | 11/13        | 9/10        | 17/24        | 30/31        | 12/13        | 12/16        | 11/13        | 22/23        |                |              |              |                |              |              |                |         |         |         |
| 05.02..2015 | Minifiler | II55C2       | X/Y        | 11/13        | 9/10        | 17/23/24     | 30/31        | 12/13        | 12/16        | 11/13        | 22/23        |                |              |              |                |              |              |                |         |         |         |
| 17.03.2015  | Minifiler | II55C3       | <b>X/Y</b> |              |             | 24           | 30/31        | 12           | 16           |              | 22           |                |              |              |                |              |              |                |         |         |         |
| 07.07.2015  | Tetraplex | II55C2       |            |              |             |              |              |              |              |              |              | 16             | 6/9.3        | 11           |                |              |              | 13/14          |         |         |         |
| 10.08.2015  | ESSplex   | II55C2       | X/Y        |              |             | 17           | 31           | 12/13        | 12/16        |              | 23           | 14/16          | 6/9.3        | 11           | 15             | 17/22        | 13/14        | 16             | 14/16   | 13      |         |
| 10.08.2015  | ESSplex   | II55C3       | X/Y        |              |             |              |              | 12/13        | 12/16        |              | 22/23        | 16             | 6/9.3        | 11           | 12/15          | 17/22        | 13/14        | 16/18          | 14/16   | 13/14   |         |
|             |           | <b>Cons.</b> | <b>X/Y</b> | <b>11/13</b> | <b>9/10</b> | <b>17/24</b> | <b>30/31</b> | <b>12/13</b> | <b>12/16</b> | <b>11/13</b> | <b>22/23</b> | <b>(14)/16</b> | <b>6/9.3</b> | <b>11/11</b> | <b>(12)/15</b> | <b>17/22</b> | <b>13/14</b> | <b>16/(18)</b> | 14/16   | 13/(14) |         |

| Run         |           | Sample        | Amel       | D13S317     | D7S820      | D2S1338      | D21S11         | D16S539      | D18S51       | CSF1PO       | FGA          | vWA | TH01        | D2S441           | D22S1045       | D12S391          | D10S1248         | D1S1656      | D3S1358      | D19S433 | D8S1179 |
|-------------|-----------|---------------|------------|-------------|-------------|--------------|----------------|--------------|--------------|--------------|--------------|-----|-------------|------------------|----------------|------------------|------------------|--------------|--------------|---------|---------|
|             |           | <b>II/109</b> |            |             |             |              |                |              |              |              |              |     |             |                  |                |                  |                  |              |              |         |         |
| 11.12.2014  | Minifiler | II109C1       | X          | 9/11        | 8/10        | 18/19        | 31/33.2        | 10/13        | 14           | 10/13        | 22           |     |             |                  |                |                  |                  |              |              |         |         |
| 11.12.2014  | Minifiler | II109C1       | X          | 11          | 8/10        | 18           | 31/33.2        | 10/13        | 14/15        | 10/13        | 22           |     |             |                  |                |                  |                  |              |              |         |         |
| 17.03.2015  | Minifiler | II109C2       | X          | 9/11        | 8           | 18/19        | 33.2           | 10/13        | 14/15        | 10/13        | 22           |     |             |                  |                |                  |                  |              |              |         |         |
| 10.08.2015. | ESSplex   | II109C2       | X          |             |             | 18           |                | 10/13        |              |              |              |     | 9           | 11/14            | 15/16          | 17/23            | 14/15            | 16           | 15           |         |         |
|             |           | <b>Cons.</b>  | <b>X/X</b> | <b>9/11</b> | <b>8/10</b> | <b>18/19</b> | <b>31/33.2</b> | <b>10/13</b> | <b>14/15</b> | <b>10/13</b> | <b>22/22</b> |     | <b>(9)/</b> | <b>(11)/(14)</b> | <b>(15)/16</b> | <b>(17)/(23)</b> | <b>(14)/(15)</b> | <b>(16)/</b> | <b>(15)/</b> |         |         |

Minifiler: AmpFISTR Minifiler PCR Amplification Kit (Applied Biosystems); Hexaplex: Investigator Hexaplex ESS Kit (Qiagen); ESSplex: Investigator ESSplex Plus Kit (Qiagen).

Run result in brackets means that the peak height of the fragment did not reach the threshold of 20 RFU. Consensus result in brackets means that the result occurred only once.

The following mock extractions were used for the autosomal STR amplification reactions

|            |           | Sample      | Amel | D13S317 | D7S820 | D2S1338 | D21S11 | D16S539 | D18S51 | CSF1PO | FGA | vWA | TH01 | D2S441 | D22S1045 | D12S391 | D10S1248 | D1S1656 | D3S1358 | D19S433 | D8S1179 |  |
|------------|-----------|-------------|------|---------|--------|---------|--------|---------|--------|--------|-----|-----|------|--------|----------|---------|----------|---------|---------|---------|---------|--|
| <b>Run</b> |           | <b>Mock</b> |      |         |        |         |        |         |        |        |     |     |      |        |          |         |          |         |         |         |         |  |
| 18.11.2014 | Minifiler | Mock1       |      |         |        |         |        |         |        |        |     |     |      |        |          |         |          |         |         |         |         |  |
| 28.11.2014 | Minifiler | Mock2       |      |         |        |         |        |         |        |        |     |     |      |        |          |         |          |         |         |         |         |  |
| 11.12.2014 | Minifiler | Mock3       |      |         |        |         |        |         |        |        |     |     |      |        |          |         |          |         |         |         |         |  |
| 05.02.2015 | Minifiler | Mock4       |      |         |        |         |        |         |        |        |     |     |      |        |          |         |          |         |         |         |         |  |
| 17.03.2015 | Minifiler | Mock5       |      |         |        |         |        |         |        |        |     |     |      |        |          |         |          |         |         |         |         |  |
| 30.06.2015 | Minifiler | Mock6       |      |         |        |         |        |         |        |        |     |     |      |        |          |         |          |         |         |         |         |  |
| 30.06.2015 | Minifiler | Mock7       |      |         |        |         |        |         |        |        |     |     |      |        |          |         |          |         |         |         |         |  |
| 12.06.2015 | Hexaplex  | Mock6       |      |         |        |         |        |         |        |        |     |     |      |        |          |         |          |         |         |         |         |  |
| 29.06.2015 | Hexaplex  | Mock7       |      |         |        |         |        |         |        |        |     |     |      |        |          |         |          |         |         |         |         |  |
| 07.07.2015 | Tetraplex | Mock4       |      |         |        |         |        |         |        |        |     |     |      |        |          |         |          |         |         |         |         |  |
| 07.07.2015 | Tetraplex | Mock6       |      |         |        |         |        |         |        |        |     |     |      |        |          |         |          |         |         |         |         |  |
| 10.08.2015 | ESSplex   | Mock5       |      |         |        |         |        |         |        |        |     |     |      |        |          |         |          |         |         |         |         |  |
| 25.09.2015 | ESSplex   | Mock6       |      |         |        |         |        |         |        |        |     |     |      |        |          |         |          |         |         |         |         |  |
| 25.09.2015 | ESSplex   | Mock7       |      |         |        |         |        |         |        |        |     |     |      |        |          |         |          |         |         |         |         |  |
| 03.03.2016 | D3S1358   | Mock5       |      |         |        |         |        |         |        |        |     |     |      |        |          |         |          |         |         |         |         |  |
|            |           |             |      |         |        |         |        |         |        |        |     |     |      |        |          |         |          |         |         |         |         |  |

Minifiler: AmpFISTR Minifiler PCR Amplification Kit (Applied Biosystems); Hexaplex: Investigator Hexaplex ESS Kit (Qiagen); ESSplex: Investigator ESSplex Plus Kit (Qiagen).

All the mock extractions and No Template Control (NTC) reactions for each batch revealed no successful amplification.

Autosomal STR amplification results for Bela III. – Göttingen

| Individual (Sample)     | Extract no. | µl Ex in PCR | Amelo | D13S317    | D21S11  | D18S51 | TH01  | D5S818 | FGA   | D16S539 | D22S1045 | D2S441     | D3S1358 | VWA     | D1S1656 | D19S433 | SE33    | D10S1248 | D12S391 | D8S1179 | D2S1338 | D7S820 | D9S1120 | PCR # | Run        |            |            |
|-------------------------|-------------|--------------|-------|------------|---------|--------|-------|--------|-------|---------|----------|------------|---------|---------|---------|---------|---------|----------|---------|---------|---------|--------|---------|-------|------------|------------|------------|
| Bela III.<br>(HU 3B Mt) | Ex 1        | 1            | -/-   | -/-        | -/-     | -/-    | 9/-   | -/-    | -/-   |         |          |            |         |         |         |         |         |          |         |         |         |        |         | 3a    | 2014.07.01 |            |            |
|                         | Ex 1        | 5            | -/-   | -/-        | -/-     | -/-    | 7/-   | -/-    | -/-   |         |          |            |         |         |         |         |         |          |         |         |         |        |         |       | 3b         | 2014.07.01 |            |
|                         | Ex 2        | 1            | -/-   | -/-        | -/-     | -/-    | -/-   | -/-    | -/-   |         |          |            |         |         |         |         |         |          |         |         |         |        |         |       | 3a         | 2014.07.01 |            |
|                         | Ex 2        | 5            | -/-   | -/-        | -/-     | -/-    | -/-   | -/-    | -/-   |         |          |            |         |         |         |         |         |          |         |         |         |        |         |       | 3b         | 2014.07.01 |            |
|                         | Ex 1        | 0.1          | -/-   | -/-        | -/-     | -/-    | -/-   | -/-    | -/-   |         |          |            |         |         |         |         |         |          |         |         |         |        |         |       | 4a         | 2014.09.29 |            |
|                         | Ex 1        | 0.5          | -/-   | -/-        | -/-     | -/-    | -/-   | -/-    | -/-   |         |          |            |         |         |         |         |         |          |         |         |         |        |         |       | 4b         | 2014.09.29 |            |
|                         | Ex 1        | 1            | Y/-   | 9/-        | -/-     | -/-    | -/-   | -/-    | -/-   |         |          |            |         |         |         |         |         |          |         |         |         |        |         |       | 4c         | 2014.09.29 |            |
|                         | Ex 2        | 0.1          | -/-   | -/-        | -/-     | -/-    | 6/-   | -/-    | -/-   |         |          |            |         |         |         |         |         |          |         |         |         |        |         |       | 4a         | 2014.09.29 |            |
|                         | Ex 2        | 0.5          | -/-   | -/-        | -/-     | -/-    | -/-   | -/-    | -/-   |         |          |            |         |         |         |         |         |          |         |         |         |        |         |       | 4b         | 2014.09.29 |            |
|                         | Ex 2        | 1            | -/-   | -/-        | -/-     | -/-    | -/-   | -/-    | -/-   |         |          |            |         |         |         |         |         |          |         |         |         |        |         |       | 4c         | 2014.09.29 |            |
|                         | Ex 1        | 1*           | -/-   | -/-        | -/-     | -/-    | -/-   | -/-    | -/-   |         |          |            |         |         |         |         |         |          |         |         |         |        |         |       | 5a         | 2014.09.29 |            |
|                         | Ex 1        | 1*           | -/-   | -/-        | -/-     | -/-    | -/-   | -/-    | -/-   |         |          |            |         |         |         |         |         |          |         |         |         |        |         |       | 5b         | 2014.09.29 |            |
|                         | Ex 1        | 1*           | Y/-   | -/-        | -/-     | -/-    | -/-   | -/-    | -/-   |         |          |            |         |         |         |         |         |          |         |         |         |        |         |       | 5c         | 2014.09.29 |            |
|                         | Ex 2        | 1*           | -/-   | -/-        | -/-     | -/-    | -/-   | -/-    | -/-   |         |          |            |         |         |         |         |         |          |         |         |         |        |         |       | 5a         | 2014.09.29 |            |
|                         | Ex 2        | 1*           | -/-   | -/-        | -/-     | -/-    | -/-   | -/-    | -/-   |         |          |            |         |         |         |         |         |          |         |         |         |        |         |       | 5b         | 2014.09.29 |            |
|                         | Ex 2        | 1*           | X/-   | -/-        | -/-     | -/-    | -/-   | -/-    | -/-   |         |          |            |         |         |         |         |         |          |         |         |         |        |         |       | 5c         | 2014.09.29 |            |
|                         | Ex 1        | 0.1          | -/-   |            | -/-     | -/-    | -/-   | -/-    | -/-   | -/-     | -/-      | -/-        | -/-     | -/-     | -/-     | -/-     | -/-     | -/-      | -/-     | -/-     | -/-     | -/-    | -/-     | -/-   | -/-        | 6a         | 2014.09.29 |
|                         | Ex 1        | 0.5          | -/-   |            | -/-     | 19/-   | -/-   | -/-    | -/-   | -/-     | -/-      | -/-        | -/-     | -/-     | -/-     | -/-     | -/-     | -/-      | -/-     | -/-     | -/-     | -/-    | -/-     | -/-   | -/-        | 6b         | 2014.09.29 |
|                         | Ex 1        | 1            | -/-   |            | 30/-    | -/-    | -/-   | -/-    | -/-   | -/-     | -/-      | -/-        | -/-     | -/-     | -/-     | -/-     | -/-     | -/-      | -/-     | -/-     | -/-     | -/-    | -/-     | -/-   | -/-        | 6c         | 2014.09.29 |
|                         | Ex 1        | 2            | X/Y   |            | -/-     | 13/15  | -/-   | -/-    | 24/-  | 11/12   | -/-      | 10/11/11.3 | -/-     | -/-     | 11/17   | -/-     | -/-     | -/-      | -/-     | -/-     | 12/-    | -/-    |         |       | 14         | 2015.08.15 |            |
|                         | Ex 3        | 1            | -/-   | -/-        | -/-     | -/-    | -/-   | -/-    | 21/-  |         |          |            |         |         |         |         |         |          |         |         |         |        |         |       |            | 7a         | 2014.09.29 |
|                         | Ex 3        | 5            | X/-   | -/-        | -/-     | 19/-   | 7/-   | 12/-   | -/-   |         |          |            |         |         |         |         |         |          |         |         |         |        |         |       |            | 7b         | 2014.09.29 |
|                         | Ex 4        | 1            | -/-   | -/-        | -/-     | -/-    | 10/-  | -/-    | -/-   |         |          |            |         |         |         |         |         |          |         |         |         |        |         |       |            | 7a         | 2014.09.29 |
|                         | Ex 4        | 5            | Y/-   | 10/-       | -/-     | -/-    | 7/8   | -/-    | -/-   |         |          |            |         |         |         |         |         |          |         |         |         |        |         |       |            | 7b         | 2014.09.29 |
| Ex 5                    | 1           | X/Y          | 9/13  | 31/32.2    | 13/16   | 7/9    | 10/12 | 21/-   |       |         |          |            |         |         |         |         |         |          |         |         |         |        |         |       | 8a         | 2014.12.01 |            |
| Ex 5                    | 3           | X/Y          | 9/13  | 30/31/32.2 | 13/16   | 7/9    | 10/12 | 21/-   |       |         |          |            |         |         |         |         |         |          |         |         |         |        |         |       | 8b         | 2014.12.01 |            |
| Ex 6                    | 1           | X/Y          | 9/13  | 29/30      | 13/16   | 7/9    | 10/12 | 21/-   |       |         |          |            |         |         |         |         |         |          |         |         |         |        |         |       | 8a         | 2014.12.01 |            |
| Ex 6                    | 3           | X/Y          | 9/13  | 31/32.2    | 13/16   | 7/9    | 10/12 | 21/-   |       |         |          |            |         |         |         |         |         |          |         |         |         |        |         |       | 8b         | 2014.12.01 |            |
| Bela III.<br>(HU 3B Ta) | Ex 7        | 1            | X/Y   | 9/13       | 32.2/-  | 13/16  | 7/9   | 10/12  | 21/-  |         |          |            |         |         |         |         |         |          |         |         |         |        |         |       | 13a        | 2015.08.10 |            |
|                         | Ex 7        | 3            | X/Y   | 9/13       | 31/32.2 | 13/16  | 7/9   | 10/12  | 21/-  |         |          |            |         |         |         |         |         |          |         |         |         |        |         |       |            | 13b        | 2015.08.10 |
|                         | Ex 7        | 3            | X/Y   |            | -/-     | 13/16  | 7/9   |        | 21/-  | 11/12   | 15/16    | 11/11.3    | 15/17   | 17/-    | 13/17.3 | 15/-    | 20/27.2 | 13/-     | 18/(19) | 14/-    | -/-     |        |         |       | 15a***     | 2015.08.20 |            |
|                         | Ex 7        | 5            | X/Y   |            | 31/32.2 | 13/16  | 7/9   |        | 21/-  | 11/12   | 15/16    | 11/11.3    | 15/17   | 17/-    | 13/17.3 | 16.2/-  | 20/-    | 13/-     | 18/19   | -/-     | 21/-    |        |         |       | 15b***     | 2015.08.20 |            |
|                         | Ex 7        | 3            | X/Y   |            | 31/-    | 13/16  | 7/9   |        | 21/-  | 11/12   | 15/16    | 11/11.3    | 15/17   | 17/-    | 13/17.3 | 15/16.2 | 20/-    | 13/-     | 18/19   | 13/14   | -/-     |        |         |       | 16a        | 2015.08.29 |            |
|                         | Ex 7        | 5            | X/Y   |            | -/-     | 13/16  | 7/9   |        | 21/-  | 11/12   | 15/16    | 11/11.3    | 15/17   | 17/-    | 13/17.3 | 15/16.2 | 20/27.2 | 13/-     | 18/19   | 13/-    | -/-     |        |         |       | 16b        | 2015.08.29 |            |
|                         | Ex 7        | 3            | X/Y   |            | 31/32.2 |        |       |        |       | 11/12   |          |            | 15/17   | 17/-    |         | 15/16.2 |         |          |         | 13/14   | 17/-    | 10/11  | 15/16   | 17a   | 2015.10.21 |            |            |
|                         | Ex 7        | 5            | X/Y   |            | 31/32.2 |        |       |        |       | 11/12   |          |            | 15/17   | 17/-    |         | 15/16.2 |         |          |         | 13/14   | 17/-    | 10/11  | 15/16   | 17b   | 2015.10.21 |            |            |
|                         | Ex 7        | 0.5          | X/Y   |            | 31/32.2 |        |       |        |       | 11/12   |          |            | 15/17   | 17/-    |         | 15/16.2 |         |          |         | 13/14   | 17/-    | 10/11  | 15/16   | 18a   | 2015.11.30 |            |            |
|                         | Ex 7        | 1            | X/Y   |            | 31/-    |        |       |        |       | 11/12   |          |            | 15/17   | 17/-    |         | 15/16.2 |         |          |         | 13/14   | 17/-    | 10/11  | 15/16   | 18b   | 2015.11.30 |            |            |
|                         | Ex 7        | 0.5          | X/Y   |            | -/-     | 16/-   | 7/9   |        | 21/-  | 11/12   | 15/16    | 11/11.3    | 17/-    | -/-     | 13/17.3 | 15/-    | -/-     | 13/-     | 18/-    | -/-     | -/-     |        |         |       | 19a        | 2015.11.30 |            |
| Ex 7                    | 1           | X/Y          |       | -/-        | 13/16   | 7/9    |       | -/-    | 11/12 | 15/16   | 11/11.3  | 15/17      | 17/-    | 13/17.3 | 15/16.2 | 20/-    | 13/-    | 18/19    | 14/-    | -/-     |         |        |         | 19b   | 2015.11.30 |            |            |
| Fingerprint             |             |              | X/Y   | 9/13       | 31/32.2 | 13/16  | 7/9   | 10/12  | 21/21 | 11/12   | 15/16    | 11/11.3    | 15/17   | 17/17   | 13/17.3 | 15/16.2 | 20/27.2 | 13/13    | 18/19   | 13/14   | 17/-    | 10/11  | 15/16   |       |            |            |            |

## Autosomal STR amplification results for Anna of Antioch– Göttingen

| Individual (Sample)            | Extr act no.               | µl Ex in PCR | Amelo | D13S317 | D21S11  | D18S51 | TH01  | D5S818 | FGA  | D16S539 | D22S1045 | D2S441 | D3S1358 | VWA   | D1S1656 | D19S433 | SE33   | D10S1248 | D12S391 | D8S1179 | D2S1338 | D7S820 | D9S1120 | PCR # | Run        |            |
|--------------------------------|----------------------------|--------------|-------|---------|---------|--------|-------|--------|------|---------|----------|--------|---------|-------|---------|---------|--------|----------|---------|---------|---------|--------|---------|-------|------------|------------|
| Anna of Antioch (HU AA Co)     | Ex 1                       | 1            | -/-   | -/-     | -/-     | -/-    | -/-   | 14/-   | -/-  |         |          |        |         |       |         |         |        |          |         |         |         |        |         | 3a    | 2014.07.01 |            |
|                                | Ex 1                       | 5            | X/-   | 11/-    | -/-     | -/-    | 7/9.3 | -/-    | -/-  |         |          |        |         |       |         |         |        |          |         |         |         |        |         |       | 3b         | 2014.07.01 |
|                                | Ex 2                       | 1            | -/-   | -/-     | -/-     | -/-    | -/-   | -/-    | -/-  |         |          |        |         |       |         |         |        |          |         |         |         |        |         |       | 3a         | 2014.07.01 |
|                                | Ex 2                       | 5            | X/-   | -/-     | -/-     | -/-    | -/-   | -/-    | -/-  |         |          |        |         |       |         |         |        |          |         |         |         |        |         |       | 3b         | 2014.07.01 |
|                                | Ex 1                       | 0.1          | -/-   | -/-     | -/-     | -/-    | -/-   | -/-    | -/-  |         |          |        |         |       |         |         |        |          |         |         |         |        |         |       | 4a         | 2014.09.29 |
|                                | Ex 1                       | 0.5          | X/-   | -/-     | -/-     | -/-    | 9.3/- | 12/14  | -/-  |         |          |        |         |       |         |         |        |          |         |         |         |        |         |       | 4b         | 2014.09.29 |
|                                | Ex 1                       | 1            | -/-   | 11/-    | 33/-    | -/-    | 7/9.3 | 8/11   | -/-  |         |          |        |         |       |         |         |        |          |         |         |         |        |         |       | 4c         | 2014.09.29 |
|                                | Ex 2                       | 0.1          | -/-   | -/-     | -/-     | -/-    | -/-   | -/-    | -/-  |         |          |        |         |       |         |         |        |          |         |         |         |        |         |       | 4a         | 2014.09.29 |
|                                | Ex 2                       | 0.5          | -/-   | -/-     | -/-     | -/-    | -/-   | -/-    | -/-  |         |          |        |         |       |         |         |        |          |         |         |         |        |         |       | 4b         | 2014.09.29 |
|                                | Ex 2                       | 1            | -/-   | -/-     | -/-     | -/-    | -/-   | -/-    | -/-  |         |          |        |         |       |         |         |        |          |         |         |         |        |         |       | 4c         | 2014.09.29 |
|                                | Ex 1                       | 1*           | -/-   | -/-     | -/-     | -/-    | -/-   | -/-    | -/-  |         |          |        |         |       |         |         |        |          |         |         |         |        |         |       | 5a         | 2014.09.29 |
|                                | Ex 1                       | 1*           | X/-   | 10/12   | -/-     | -/-    | 9.3/- | -/-    | -/-  |         |          |        |         |       |         |         |        |          |         |         |         |        |         |       | 5b         | 2014.09.29 |
|                                | Ex 1                       | 1*           | -/-   | -/-     | -/-     | -/-    | 7/9.3 | -/-    | -/-  |         |          |        |         |       |         |         |        |          |         |         |         |        |         |       | 5c         | 2014.09.29 |
|                                | Ex 2                       | 1*           | -/-   | -/-     | -/-     | -/-    | -/-   | -/-    | -/-  |         |          |        |         |       |         |         |        |          |         |         |         |        |         |       | 5a         | 2014.09.29 |
|                                | Ex 2                       | 1*           | -/-   | -/-     | -/-     | -/-    | -/-   | -/-    | -/-  |         |          |        |         |       |         |         |        |          |         |         |         |        |         |       | 5b         | 2014.09.29 |
|                                | Ex 2                       | 1*           | -/-   | -/-     | -/-     | -/-    | -/-   | -/-    | -/-  |         |          |        |         |       |         |         |        |          |         |         |         |        |         |       | 5c         | 2014.09.29 |
|                                | Ex 1                       | 0.1          | -/-   |         | -/-     | -/-    | -/-   | -/-    | -/-  | -/-     | -/-      | 11/-   | -/-     | -/-   | -/-     | -/-     | -/-    | -/-      | -/-     | -/-     | -/-     | -/-    | -/-     | -/-   | 6a         | 2014.09.29 |
|                                | Ex 1                       | 0.5          | -/-   |         | -/-     | 26/-   | -/-   | -/-    | -/-  | -/-     | -/-      | 14/-   | 13.3/-  | -/-   | -/-     | -/-     | -/-    | -/-      | -/-     | -/-     | -/-     | -/-    | -/-     | -/-   | 6b         | 2014.09.29 |
|                                | Ex 1                       | 1            | -/-   |         | -/-     | -/-    | -/-   | -/-    | -/-  | -/-     | 10/11    | 11/-   | 14/-    | -/-   | -/-     | -/-     | -/-    | -/-      | -/-     | -/-     | -/-     | -/-    | -/-     | -/-   | 6c         | 2014.09.29 |
|                                | Ex 1                       | 2            | X/-   |         | -/-     | 18/-   | 7/-   |        | -/-  | 9/10/11 | -/-      | -/-    | -/-     | -/-   | -/-     | -/-     | 21.2/- | 14/-     | -/-     | 13/-    | 27/-    |        |         |       | 14         | 2015.08.15 |
|                                | Ex 3                       | 1            | -/-   | 11/-    | -/-     | 16/-   | -/-   | -/-    | -/-  |         |          |        |         |       |         |         |        |          |         |         |         |        |         |       | 7a         | 2014.09.29 |
|                                | Ex 3                       | 5            | -/-   | -/-     | -/-     | -/-    | -/-   | -/-    | -/-  |         |          |        |         |       |         |         |        |          |         |         |         |        |         |       | 7b         | 2014.09.29 |
|                                | Ex 4                       | 1            | -/-   | -/-     | -/-     | -/-    | -/-   | 14/-   | 21/- |         |          |        |         |       |         |         |        |          |         |         |         |        |         |       | 7a         | 2014.09.29 |
|                                | Ex 4                       | 5            | X/-   | 11/-    | 30/33   | 18/-   | 7/9.3 | -/-    | 23/- |         |          |        |         |       |         |         |        |          |         |         |         |        |         |       | 7b         | 2014.09.29 |
|                                | Ex 5                       | 1            | -/-   | -/-     | 33/-    | -/-    | 9.3/- | 11/-   | -/-  |         |          |        |         |       |         |         |        |          |         |         |         |        |         |       | 8a         | 2014.12.01 |
|                                | Ex 5                       | 3            | X/-   | 11/-    | -/-     | -/-    | 9.3/- | 14/-   | -/-  |         |          |        |         |       |         |         |        |          |         |         |         |        |         |       | 8b         | 2014.12.01 |
|                                | Ex 5                       | 2            | -/-   |         | -/-     | -/-    | -/-   | -/-    | -/-  | -/-     | -/-      | -/-    | -/-     | -/-   | -/-     | -/-     | -/-    | -/-      | -/-     | -/-     | -/-     | -/-    | -/-     | -/-   | 14         | 2015.08.15 |
|                                | Anna of Antioch (HU AA Ve) | Ex 6         | 1     | -/-     | 8/9     | 28/-   | -/-   | 8/-    | 11/- | -/-     |          |        |         |       |         |         |        |          |         |         |         |        |         |       | 9a         | 2014.12.14 |
| Ex 6                           |                            | 3            | -/-   | -/-     | -/-     | -/-    | -/-   | -/-    | -/-  |         |          |        |         |       |         |         |        |          |         |         |         |        |         |       | 9b         | 2014.12.14 |
| Anna of Antioch (HU AA Fe)**** | Ex 8                       | 1            | -/-   | -/-     | -/-     | -/-    | 9.3/- | -/-    | -/-  |         |          |        |         |       |         |         |        |          |         |         |         |        |         | 13a   | 2015.08.10 |            |
|                                | Ex 8                       | 3            | -/-   | 11/12   | 29/32.2 | 19/-   | 9.3/- | 12/-   | -/-  |         |          |        |         |       |         |         |        |          |         |         |         |        |         | 13b   | 2015.08.10 |            |
|                                | Ex 8                       | 5            | X/-   |         | -/-     | 12/-   | 6/9.3 |        | -/-  | 9/12    | 12/15    | 11/14  | 17/-    | 18/-  | -/-     | -/-     | -/-    | 13/14    | 18/-    | -/-     | -/-     |        |         | 15*** | 2015.08.20 |            |
|                                | Ex 8                       | 5            | X/Y   |         | -/-     | 19/-   | 8/9.3 |        | 19/- | 9/11/12 | 13/15/16 | 11/15  | -/-     | -/-   | 16/-    | -/-     | -/-    | 16/-     | 23/-    | -/-     | 19/-    |        |         | 16    | 2015.08.29 |            |
|                                | Ex 8                       | 3            | X/Y   |         | -/-     |        |       |        |      | 11/12   |          |        | 14/16   | -/-   |         | 14/16   |        |          | 13/-    | 17/19   | 9/-     | 15/16  |         | 17a   | 2015.10.21 |            |
|                                | Ex 8                       | 5            | X/-   |         | 28/-    |        |       |        |      | 11/12   |          |        | -/-     | 14/17 |         | -/-     |        | 12/-     | -/-     | -/-     | -/-     |        |         | 17b   | 2015.10.21 |            |
|                                | Ex 8                       | 0.5          | -/-   |         | -/-     |        |       |        |      | 11/-    |          |        | -/-     | -/-   |         | -/-     |        | 11/-     | -/-     | -/-     | -/-     |        |         | 18a   | 2015.11.30 |            |
|                                | Ex 8                       | 1            | X/-   |         | -/-     |        |       |        |      | -/-     |          |        | 16/-    | -/-   |         | 13/-    |        |          | 14/-    | -/-     | -/-     | -/-    |         | 18b   | 2015.11.30 |            |
|                                | Ex 8                       | 0.5          | -/-   |         | -/-     | -/-    | -/-   | -/-    | -/-  | 12/-    | -/-      | -/-    | -/-     | -/-   | -/-     | -/-     | -/-    | -/-      | -/-     | -/-     | -/-     | -/-    | -/-     | -/-   | 19a        | 2015.11.30 |
|                                | Ex 8                       | 1            | -/-   |         | -/-     | -/-    | 6/-   | -/-    | -/-  | -/-     | -/-      | -/-    | -/-     | -/-   | -/-     | -/-     | -/-    | -/-      | -/-     | -/-     | -/-     | -/-    | -/-     | -/-   | 19b        | 2015.11.30 |
| Fingerprint Costa only         |                            |              | X/-   | 11/-    | 33/-    | 18/-   | 7/9.3 | 14/-   | -/-  | 10/11   | 11/-     | -/-    | -/-     | -/-   | -/-     | -/-     | -/-    | -/-      | -/-     | -/-     | -/-     | -/-    | -/-     |       |            |            |

\* PCR with products from PCR 4; \*\*\* Amplification with the Investigator ESSplex SE QS kit. Partly revealed some additional unspecific products; \*\*\*\* The genotype of the femur is different from the genotype of the costa. It is either deeply contaminated (decontamination with bleach as for all other bones) or it is a sample from another (male) individual. Negative controls for the PCRs revealed no amplification.

Autosomal STR amplification results for the Foetus- Göttingen

| Individual (Sample) | Extract no. | µl Ex in PCR | Amelo      | D13S317     | D21S11        | D18S51      | TH01         | D5S818       | FGA          | D16S539 | D22S1045 | D2S441 | D3S1358 | VWA | D1S1656 | D19S433 | SE33 | D10S1248 | D12S391 | D8S1179 | D2S1338 | D7S820 | D9S1120 | PCR # | Run |            |            |            |            |            |
|---------------------|-------------|--------------|------------|-------------|---------------|-------------|--------------|--------------|--------------|---------|----------|--------|---------|-----|---------|---------|------|----------|---------|---------|---------|--------|---------|-------|-----|------------|------------|------------|------------|------------|
| Foetus (HU FS Ve)   | Ex 1        | 1            | X/Y        | 12/-        | 30.2/-        | 17/19       | 6/9.3        | 12/-         | 20/25        |         |          |        |         |     |         |         |      |          |         |         |         |        |         |       | 3a  | 2014.07.01 |            |            |            |            |
|                     | Ex 1        | 5            | X/-        | -/-         | -/-           | -/-         | 6/9.3        | -/-          | -/-          |         |          |        |         |     |         |         |      |          |         |         |         |        |         |       |     | 3b         | 2014.07.01 |            |            |            |
|                     | Ex 1        | 0.1          | X/-        | -/-         | -/-           | -/-         | 6/-          | -/-          | -/-          |         |          |        |         |     |         |         |      |          |         |         |         |        |         |       |     |            | 4a         | 2014.09.29 |            |            |
|                     | Ex 1        | 0.5          | X/-        | 12/-        | -/-           | -/-         | 6/9.3        | 12/13        | 25/-         |         |          |        |         |     |         |         |      |          |         |         |         |        |         |       |     |            | 4b         | 2014.09.29 |            |            |
|                     | Ex 1        | 1            | -/-        | 12/-        | 30.2/-        | 19/-        | 6/9.3        | 13/-         | 20/25        |         |          |        |         |     |         |         |      |          |         |         |         |        |         |       |     |            |            | 4c         | 2014.09.29 |            |
|                     | Ex 1        | 1*           | -/-        | -/-         | -/-           | -/-         | -/-          | -/-          | -/-          | -/-     |          |        |         |     |         |         |      |          |         |         |         |        |         |       |     |            |            |            | 5a         | 2014.09.29 |
|                     | Ex 1        | 1*           | X/-        | -/-         | -/-           | -/-         | 6/9.3        | 12/13        | -/-          |         |          |        |         |     |         |         |      |          |         |         |         |        |         |       |     |            |            |            | 5b         | 2014.09.29 |
|                     | Ex 1        | 1*           | -/-        | 10/-        | -/-           | -/-         | 6/9.3        | 13/-         | 20/-         |         |          |        |         |     |         |         |      |          |         |         |         |        |         |       |     |            |            |            |            | 5c         |
| <b>Fingerprint</b>  |             |              | <b>X/-</b> | <b>12/-</b> | <b>30.2/-</b> | <b>19/-</b> | <b>6/9.3</b> | <b>12/13</b> | <b>20/25</b> |         |          |        |         |     |         |         |      |          |         |         |         |        |         |       |     |            |            |            |            |            |

Negative controls for the PCRs revealed no amplification.

## Autosomal STR amplification results for I/3 G 5. skeleton – Göttingen

| Individual (Sample)          | Extract no. | µl Ex in PCR | Amelo | D13S317 | D21S11         | D18S51     | TH01 | D5S818 | FGA        | D16S539 | D22S1045 | D2S441 | D3S1358 | VWA   | D1S1656 | D19S433 | SE33    | D10S1248 | D12S391 | D8S1179 | D2S1338  | D7S820 | D9S1120 | PCR #  | Run        |
|------------------------------|-------------|--------------|-------|---------|----------------|------------|------|--------|------------|---------|----------|--------|---------|-------|---------|---------|---------|----------|---------|---------|----------|--------|---------|--------|------------|
| I/3 G 5. skeleton (HU 3G Ta) | Ex 1        | 1            | X/Y   | 8/13    | 25/30.2/31.2   | 19/-       | 7/9  | 11/12  | 19/20      |         |          |        |         |       |         |         |         |          |         |         |          |        |         | 2      | 2014.06.30 |
|                              | Ex 1        | 5            | X/Y   | 8/13    | 25/(30.2)/31.2 | 19/-       | 7/9  | 11/12  | 19/20      |         |          |        |         |       |         |         |         |          |         |         |          |        |         | 1      | 2014.06.06 |
|                              | Ex 2        | 1            | X/-   | 8/13    | 30.2/31.2      | 19/-       | 7/9  | 11/12  | 19/20      |         |          |        |         |       |         |         |         |          |         |         |          |        |         | 2a     | 2014.06.30 |
|                              | Ex 2        | 5            | X/Y   | 8/13    | 25/30.2/31.2   | 19/-       | 7/9  | 11/12  | 19/20      |         |          |        |         |       |         |         |         |          |         |         |          |        |         | 2b     | 2014.06.30 |
|                              | Ex 1        | 2            | X/Y   |         | 25/31.2        | 19/23      | 7/9  |        | 19/20      | 11/-    | 15/16    | 11/-   | 14/17   | 14/19 | 13/17.3 | 13/14   | 18/29.2 | 14/15    | 15/21   | 13/-    | 19/24/25 |        |         | 14     | 2015.08.15 |
|                              | Ex 3        | 1            | X/Y   | 8/13    | 25/31.2        | 19/23      | 7/9  | 11/12  | 19/20      |         |          |        |         |       |         |         |         |          |         |         |          |        |         | 8a     | 2014.12.01 |
|                              | Ex 3        | 3            | X/Y   | 8/13    | 25/31.2        | 19/-       | 7/9  | 11/12  | 19/20      |         |          |        |         |       |         |         |         |          |         |         |          |        |         | 8b     | 2014.12.01 |
|                              | Ex 3        | 2            | X/Y   |         | 25/-           | 19/23/(24) | 7/9  |        | 19/20/(24) | 11/-    | 15/16    | 11/-   | 14/17   | -/-   | 13/-    | 13/14   | 18/-    | 14/15    | 15/21   | 13/-    | -/-      |        |         | 14     | 2015.08.15 |
| I/3 G 5. skeleton (HU 3G Co) | Ex 4        | 1            | X/Y   | 8/-     | 25/31.2        | 19/23      | 7/9  | 11/12  | 20/-       |         |          |        |         |       |         |         |         |          |         |         |          |        |         | 8a     | 2014.12.01 |
|                              | Ex 4        | 3            | X/Y   | 8/13    | 25/31.2        | 19/23      | 7/9  | 11/12  | 19/20      |         |          |        |         |       |         |         |         |          |         |         |          |        |         | 8b     | 2014.12.01 |
| I/3 G 5. skeleton (HU 3G Fe) | Ex 5        | 1            | Y/-   | 8/13    | -/-            | 19/23      | 7/9  | 11/12  | 19/20      |         |          |        |         |       |         |         |         |          |         |         |          |        |         | 13a    | 2015.08.10 |
|                              | Ex 5        | 3            | X/Y   | 8/13    | 25/31.2        | 19/23      | 7/9  | 11/12  | 19/20      |         |          |        |         |       |         |         |         |          |         |         |          |        |         | 13b    | 2015.08.10 |
|                              | Ex 5        | 3            | X/Y   |         | 25/-           | 19/23      | 7/9  |        | 19/20      | 11/-    | 15/16    | 11/-   | 14/17   | 19/-  | 17.3/-  | 13/-    | 18/-    | 14/15    | -/-     | (10)/13 | 20/24    |        |         | 15a*** | 2015.08.20 |
|                              | Ex 5        | 5            | X/Y   |         | 25/31.2        | 19/23      | 7/9  |        | 19/20      | 11/-    | 15/16    | 11/-   | 14/17   | 19/-  | 13/-    | 13/14   | 18/29.2 | 14/15    | 15/21   | (10)/13 | 24/-     |        |         | 15b*** | 2015.08.20 |
|                              | Ex 5        | 3            | X/Y   |         | 25/-           | 19/23      | 7/9  |        | 20/-       | 11/-    | 15/16    | 11/-   | 14/17   | 14/19 | 13/17.3 | 13/-    | 18/-    | 14/15    | 15/21   | 13/-    | (25)/-   |        |         | 16a    | 2015.08.29 |
|                              | Ex 5        | 5            | X/Y   |         | 25/-           | 19/23      | 7/9  |        | 19/20      | 11/-    | 15/16    | 11/-   | 14/17   | 14/19 | 13/17.3 | 13/14   | 18/29.2 | 14/15    | 15/21   | 13/-    | 24/-     |        |         | 16b    | 2015.08.29 |
|                              | Ex 5        | 3            | X/Y   |         | 25/31.2        |            |      |        |            | 11/-    |          |        | 14/17   | 14/19 |         | 13/14   |         |          |         | 13/-    | 24/25    | 8/12   | 16/-    | 17a    | 2015.10.21 |
|                              | Ex 5        | 5            | X/Y   |         | 25/31.2        |            |      |        |            | 11/-    |          |        | 14/17   | 14/19 |         | 13/14   |         |          |         | 13/-    | 24/25    | 8/12   | 16/-    | 17b    | 2015.10.21 |
| Fingerprint                  |             |              | X/Y   | 8/13    | 25/31.2        | 19/23      | 7/9  | 11/12  | 19/20      | 11/11   | 15/16    | 11/11  | 14/17   | 14/19 | 13/17.3 | 13/14   | 18/29.2 | 14/15    | 15/21   | 13/13   | 24/25    | 8/12   | 16/16   |        |            |

\*\*\* Amplification with the Investigator ESSplex SE QS kit. Partly revealed some additional unspecific products.  
Negative controls for the PCRs revealed no amplification.

## Autosomal STR amplification results for I/4 H 6. skeleton – Göttingen

| Individual (Sample)          | Extract no. | µl Ex in PCR | Amelo | D13S317 | D21S11  | D18S51 | TH01  | D5S818 | FGA   | D16S539  | D22S1045 | D2S441 | D3S1358 | VWA        | D1S1656    | D19S433   | SE33           | D10S1248 | D12S391 | D8S1179 | D2S1338 | D7S820 | D9S1120 | PCR # | Run        |            |            |
|------------------------------|-------------|--------------|-------|---------|---------|--------|-------|--------|-------|----------|----------|--------|---------|------------|------------|-----------|----------------|----------|---------|---------|---------|--------|---------|-------|------------|------------|------------|
| I/4 H 6. skeleton (HU 4H Mt) | Ex 1        | 1            | X/Y   | 8/13    | 30/32.2 | 14/-   | 6/7   | 10/12  | 19/25 |          |          |        |         |            |            |           |                |          |         |         |         |        |         | 2     | 2014.06.30 |            |            |
|                              | Ex 1        | 5            | X/Y   | 8/-     | -/-     | -/-    | 6/7   | -/-    | -/-   |          |          |        |         |            |            |           |                |          |         |         |         |        |         | 1     | 2014.06.06 |            |            |
|                              | Ex 2        | 1            | X/Y   | 8/13    | 30/32.2 | 14/-   | -/-   | 10/12  | 19/25 |          |          |        |         |            |            |           |                |          |         |         |         |        |         |       | 2a         | 2014.06.30 |            |
|                              | Ex 2        | 5            | X/Y   | 8/13    | 30/32.2 | 14/-   | 6/7   | 10/12  | 19/25 |          |          |        |         |            |            |           |                |          |         |         |         |        |         |       | 2b         | 2014.06.30 |            |
|                              | Ex 1        | 0.1          | X/Y   | 13/-    | -/-     | 14/-   | 6/7   | 12/-   | 19/-  |          |          |        |         |            |            |           |                |          |         |         |         |        |         |       | 4a         | 2014.09.29 |            |
|                              | Ex 1        | 0.5          | X/Y   | 8/13    | 30/32.2 | 14/-   | 6/7   | 10/12  | 19/25 |          |          |        |         |            |            |           |                |          |         |         |         |        |         |       |            | 4b         | 2014.09.29 |
|                              | Ex 1        | 1            | X/Y   | 8/13    | 30/-    | 14/-   | 6/7   | 10/12  | 19/25 |          |          |        |         |            |            |           |                |          |         |         |         |        |         |       |            | 4c         | 2014.09.29 |
|                              | Ex 2        | 0.1          | X/-   | -/-     | 28/-    | 14/-   | -/-   | -/-    | 25/-  |          |          |        |         |            |            |           |                |          |         |         |         |        |         |       |            | 4a         | 2014.09.29 |
|                              | Ex 2        | 0.5          | X/Y   | 8/13    | 32.2/-  | 14/-   | -/-   | 12/-   | 19/25 |          |          |        |         |            |            |           |                |          |         |         |         |        |         |       |            | 4b         | 2014.09.29 |
|                              | Ex 2        | 1            | Y/-   | 13/-    | -/-     | 14/-   | 6/7   | 10/12  | 19/25 |          |          |        |         |            |            |           |                |          |         |         |         |        |         |       |            | 4c         | 2014.09.29 |
|                              | Ex 1        | 1*           | X/Y   | -/-     | -/-     | -/-    | 6/7   | 8/12   | -/-   |          |          |        |         |            |            |           |                |          |         |         |         |        |         |       |            | 5a         | 2014.09.29 |
|                              | Ex 1        | 1*           | X/Y   | -/-     | 30/-    | -/-    | 6/7   | 10/12  | 19/25 |          |          |        |         |            |            |           |                |          |         |         |         |        |         |       |            | 5b         | 2014.09.29 |
|                              | Ex 1        | 1*           | X/Y   | 8/13    | 30/-    | 14/-   | 6/7   | 12/-   | 19/25 |          |          |        |         |            |            |           |                |          |         |         |         |        |         |       |            | 5c         | 2014.09.29 |
|                              | Ex 2        | 1*           | X/-   | -/-     | 28/-    | -/-    | -/-   | -/-    | -/-   |          |          |        |         |            |            |           |                |          |         |         |         |        |         |       |            | 5a         | 2014.09.29 |
|                              | Ex 2        | 1*           | X/Y   | 10/-    | 32.2/-  | -/-    | -/-   | -/-    | -/-   |          |          |        |         |            |            |           |                |          |         |         |         |        |         |       |            | 5b         | 2014.09.29 |
|                              | Ex 2        | 1*           | Y/-   | -/-     | -/-     | 14/-   | 6/7   | 10/12  | 19/25 |          |          |        |         |            |            |           |                |          |         |         |         |        |         |       |            | 5c         | 2014.09.29 |
|                              | Ex 1        | 0.1          | Y/-   |         | -/-     | 14/-   | 6/7   |        | -/-   | 11/12/14 | -/-      | 10/11  | 15/19   | 18/-       | 17.3/-     | -/-       | -/-            | 12/13    | 18/-    | -/-     | -/-     |        |         |       |            | 6a         | 2014.09.29 |
|                              | Ex 1        | 0.5          | X/Y   |         | -/-     | 14/-   | 6/7   |        | 19/25 | 12/14    | 15/16    | 10/11  | 15/19   | 18/-       | 11/17.3    | 16/-      | 22.2           | 13/-     | 18/-    | 12/-    | 18/-    |        |         |       |            | 6b         | 2014.09.29 |
|                              | Ex 1        | 1            | X/Y   |         | 32.2/-  | 14/-   | 6/7   |        | 19/25 | 12/14    | 15/16    | 10/11  | 15/19   | 17/18      | 11/17.3    | 14/16     | 22.2/28.2      | 13/-     | 18/-    | 12/-    | 18/-    |        |         |       |            | 6c         | 2014.09.29 |
|                              | Ex 1        | 2            | X/Y   |         | 30/32.2 | 14/-   | 6/7   |        | 19/25 | 12/14    | 15/16    | 10/11  | 15/19   | 16/17/(18) | 11/17.3    | 14/16     | 21.2/22.2/28.2 | 13/-     | 18/-    | 12/-    | -/-     |        |         |       |            | 14         | 2015.08.15 |
| Ex 3                         | 1           | X/Y          | 8/13  | 30/32.2 | 14/-    | 6/7    | 10/12 | 19/25  |       |          |          |        |         |            |            |           |                |          |         |         |         |        |         |       | 8a         | 2014.12.01 |            |
| Ex 3                         | 3           | X/Y          | 8/13  | 30/32.2 | 14/-    | 6/7    | 10/12 | 19/25  |       |          |          |        |         |            |            |           |                |          |         |         |         |        |         |       | 8b         | 2014.12.01 |            |
| Ex 4                         | 1           | X/Y          | 8/13  | 30/32.2 | 14/-    | 6/7    | 10/12 | 19/25  |       |          |          |        |         |            |            |           |                |          |         |         |         |        |         |       | 8a         | 2014.12.01 |            |
| Ex 4                         | 3           | X/Y          | 8/13  | 30/32.2 | 14/-    | 6/7    | 10/12 | 19/25  |       |          |          |        |         |            |            |           |                |          |         |         |         |        |         |       | 8b         | 2014.12.01 |            |
| Ex 3                         | 2           | X/Y          |       | 30/32.2 | 14/-    | 6/7    |       | 19/25  | 12/14 | 15/16    | 10/11    | -/-    | 17/-    | 11/17.3    | 14/16/(17) | 28.2/29.2 | 13/-           | 18/-     | -/-     | 16/-    |         |        |         |       | 14         | 2015.08.15 |            |
| I/4 H 6. skeleton (HU 4H Ta) | Ex 5        | 1            | X/Y   | 8/13    | 30/32.2 | 14/-   | 6/7   | 10/12  | 19/25 |          |          |        |         |            |            |           |                |          |         |         |         |        |         |       | 13a        | 2015.08.10 |            |
|                              | Ex 5        | 3            | X/Y   | 8/13    | 30/32.2 | 14/-   | 6/7   | 10/12  | 19/25 |          |          |        |         |            |            |           |                |          |         |         |         |        |         |       |            | 13b        | 2015.08.10 |
|                              | Ex 5        | 1            | X/Y   |         | 30/32.2 | 14/-   | 6/7   |        | 19/25 | 12/14    | 15/16    | 10/11  | 15/19   | 17/18      | 11/17.3    | 14/16     | 22.2/28.2      | 13/-     | 18/-    | 12/(13) | 18/-    |        |         |       |            | 15a***     | 2015.08.20 |
|                              | Ex 5        | 3            | X/Y   |         | 30/32.2 | 14/-   | 6/7   |        | 19/25 | 12/14    | 15/16    | 10/11  | 15/19   | 17/18      | 11/17.3    | 14/16     | 22.2/28.2      | 13/-     | 18/-    | 12/(13) | 18/-    |        |         |       |            | 15b***     | 2015.08.20 |
|                              | Ex 5        | 1            | X/Y   |         | 30/32.2 | 14/-   | 6/7   |        | 19/25 | 12/14    | 15/16    | 10/11  | 15/19   | 17/18      | 11/17.3    | 14/16     | 22.2/28.2      | 13/-     | 18/-    | 12/-    | 18/-    |        |         |       |            | 16a        | 2015.08.29 |
|                              | Ex 5        | 3            | X/Y   |         | 30/32.2 | 14/-   | 6/7   |        | 19/25 | 12/14    | 15/16    | 10/11  | 15/19   | 17/18      | 11/17.3    | 14/16     | 22.2/28.2      | 13/-     | 18/-    | 12/-    | 18/-    |        |         |       |            | 16b        | 2015.08.29 |
|                              | Ex 5        | 1            | X/Y   |         | 30/32.2 |        |       |        |       | 12/14    |          |        | 15/19   | 17/18      |            | 14/16     |                |          |         | 12/-    | 18/-    | 11/12  | 16/-    |       |            | 17a        | 2015.10.21 |
|                              | Ex 5        | 3            | X/Y   |         | 30/32.2 |        |       |        |       | 12/14    |          |        | 15/19   | 17/18      |            | 14/16     |                |          |         | 12/-    | 18/-    | 11/12  | 16/-    |       |            | 17b        | 2015.10.21 |
| Fingerprint                  |             |              | X/Y   | 8/13    | 30/32.2 | 14/14  | 6/7   | 10/12  | 19/25 | 12/14    | 15/16    | 10/11  | 15/19   | 17/18      | 11/17.3    | 14/16     | 22.2/28.2      | 13/13    | 18/18   | 12/12   | 18/18   | 11/12  | 16/16   |       |            |            |            |

\* PCR with products from PCR 4; \*\*\* Amplification with the Investigator ESSplex SE QS kit. Partly revealed some additional unspecific products  
 Negative controls for the PCRs revealed no amplification..

## Autosomal STR amplification results for II/52 3. skeleton – Göttingen

| Individual (Sample)                               | Extract no. | µl Ex in PCR | Amelo      | D13S317     | D21S11         | D18S51       | TH01         | D5S818       | FGA          | D16S539      | D22S1045   | D2S441     | D3S1358     | VWA        | D1S1656    | D19S433     | SE33       | D10S1248    | D12S391    | D8S1179      | D2S1338    | D7S820     | D9S1120      | PCR # | Run        |            |            |
|---------------------------------------------------|-------------|--------------|------------|-------------|----------------|--------------|--------------|--------------|--------------|--------------|------------|------------|-------------|------------|------------|-------------|------------|-------------|------------|--------------|------------|------------|--------------|-------|------------|------------|------------|
| II/52<br>(Unmarked)<br>3. skeleton<br>(HU 52 Ta)  | Ex 1        | 1            | X/Y        | 12/13       | 30/32.2        | 13/-         | 9/9.3        | 12/-         | -/-          |              |            |            |             |            |            |             |            |             |            |              |            |            |              | 3a    | 2014.07.01 |            |            |
|                                                   | Ex 1        | 5            | X/Y        | 8/13        | 30/-           | 13/17        | 9/9.3        | 10/12        | 21/-         |              |            |            |             |            |            |             |            |             |            |              |            |            |              |       | 3b         | 2014.07.01 |            |
|                                                   | Ex 2        | 1            | X/Y        | -/-         | -/-            | -/-          | 9/-          | 14/-         | -/-          |              |            |            |             |            |            |             |            |             |            |              |            |            |              |       |            | 3a         | 2014.07.01 |
|                                                   | Ex 2        | 5            | X/Y        | 8/13        | 30/32.2        | 13/-         | 9/9.3        | 10/-         | 21/25        |              |            |            |             |            |            |             |            |             |            |              |            |            |              |       |            | 3b         | 2014.07.01 |
|                                                   | Ex 1        | 2            | X/Y        |             | 30/32.2        | -/-          | 9/9.3        |              | 20/21        | 10/11        | 15/17      | 9/-        | 14/-        | -/-        | 12/17.3    | 13/-        | -/-        | 13/-        | 17/18      | 14/-         | -/-        |            |              |       | 14         | 2015.08.15 |            |
|                                                   | Ex 3        | 1            | Y/-        | 8/13        | 32.2/-         | 13/17        | 9/9.3        | 12/-         | 25/-         |              |            |            |             |            |            |             |            |             |            |              |            |            |              |       |            | 8a         | 2014.12.01 |
|                                                   | Ex 3        | 3            | X/Y        | 8/-         | 32.2/-         | 13/-         | 9/9.3        | 10/12        | -/-          |              |            |            |             |            |            |             |            |             |            |              |            |            |              |       |            | 8b         | 2014.12.01 |
|                                                   | Ex 4        | 1            | X/Y        | 8/13        | 30/-           | 13/17        | 9/9.3        | 12/-         | 21/25        |              |            |            |             |            |            |             |            |             |            |              |            |            |              |       |            | 8a         | 2014.12.01 |
|                                                   | Ex 4        | 3            | X/Y        | 8/10/13     | 30/32.2        | 13/17        | 9/9.3        | 10/12        | 21/25        |              |            |            |             |            |            |             |            |             |            |              |            |            |              |       |            | 8b         | 2014.12.01 |
| Ex 3                                              | 2           | -/-          |            | -/-         | -/-            | -/-          |              | -/-          | -/-          | -/-          | -/-        | -/-        | -/-         | -/-        | -/-        | -/-         | -/-        | -/-         | -/-        | -/-          | -/-        | -/-        | -/-          | -/-   | 14         | 2015.08.15 |            |
| II/52<br>(Unmarked)<br>3. skeleton<br>(HU 52 Fe)  | Ex 5        | 1            | -/-        | 8/-         | -/-            | -/-          | 9/-          | 12/-         | 21/-         |              |            |            |             |            |            |             |            |             |            |              |            |            |              |       | 13a        | 2015.08.10 |            |
|                                                   | Ex 5        | 3            | X/-        | -/-         | -/-            | -/-          | 9/9.3/10     | -/-          | 22/-         |              |            |            |             |            |            |             |            |             |            |              |            |            |              |       |            | 13b        | 2015.08.10 |
|                                                   | Ex 5        | 4            | X/-        |             | -/-            | -/-          | 9/-          |              | -/-          | (12)/-       | 16/-       | -/-        | 18/-        | -/-        | -/-        | -/-         | (23.2)/-   | (13)/-      | -/-        | -/-          | -/-        |            |              |       |            | 15a***     | 2015.08.20 |
|                                                   | Ex 5        | 5            | X/Y        |             | -/-            | -/-          | -/-          |              | -/-          | -/-          | -/-        | 11/14      | 18/-        | (21)/-     | -/-        | -/-         | 23.2/-     | -/-         | 18/-       | -/-          | -/-        |            |              |       |            | 15b***     | 2015.08.20 |
|                                                   | Ex 5        | 3            | X/-        |             | -/-            | 15/-         | 9.3/-        |              | -/-          | 12/-         | 12/-       | 11/-       | -/-         | -/-        | -/-        | -/-         | -/-        | 13/-        | -/-        | -/-          | -/-        |            |              |       |            | 16a        | 2015.08.29 |
|                                                   | Ex 5        | 5            | X/Y        |             | -/-            | -/-          | 8/9/10       |              | -/-          | -/-          | -/-        | 9/11       | 15/18       | 16/-       | -/-        | -/-         | -/-        | 13/-        | 18/-       | -/-          | -/-        |            |              |       |            | 16b        | 2015.08.29 |
| II/52<br>(Unmarked)<br>3. skeleton<br>(HU 52 Ta2) | Ex 6        | 3            | X/Y        |             | 30/32.2        |              |              |              |              | 11/-         |            |            | 14/-        | -/-        |            | 13/14       |            |             |            | 14/-         | 25/-       | 8/9        | 15/16        | 17a   | 2015.10.21 |            |            |
|                                                   | Ex 6        | 5            | Y/-        |             | -/-            |              |              |              |              | -/-          |            |            | -/-         | -/-        |            | -/-         |            |             |            | -/-          | -/-        | -/-        | -/-          | 17b   | 2015.10.21 |            |            |
|                                                   | Ex 6        | 0.5          | Y/-        |             | 32.2/-         |              |              |              |              | 11/-         |            |            | 14/-        | -/-        |            | -/-         |            |             |            | -/-          | -/-        | -/-        | 15/-         | 18a   | 2015.11.30 |            |            |
|                                                   | Ex 6        | 1            | -/-        |             | -/-            |              |              |              |              | 10/11        |            |            | 14/-        | -/-        |            | 13/-        |            |             |            | 12/-         | -/-        | 9/-        | 15/16        | 18b   | 2015.11.30 |            |            |
|                                                   | Ex 6        | 0.5          | Y/-        |             | -/-            | 13/-         | 9/9.3        |              | -/-          | 11/-         | -/-        | -/-        | 14/-        | -/-        | -/-        | -/-         | -/-        | -/-         | -/-        | -/-          | -/-        | -/-        |              |       | 19a        | 2015.11.30 |            |
|                                                   | Ex 6        | 1            | -/-        |             | -/-            | -/-          | 9/-          |              | 25/-         | 11/-         | -/-        | 10/-       | -/-         | -/-        | -/-        | (12)/13     | -/-        | 13/-        | -/-        | 12/-         | -/-        |            |              |       | 19b        | 2015.11.30 |            |
| <b>Fingerprint Tarsalia only</b>                  |             |              | <b>X/Y</b> | <b>8/13</b> | <b>30/32.2</b> | <b>13/17</b> | <b>9/9.3</b> | <b>10/12</b> | <b>21/25</b> | <b>10/11</b> | <b>-/-</b> | <b>-/-</b> | <b>14/-</b> | <b>-/-</b> | <b>-/-</b> | <b>13/-</b> | <b>-/-</b> | <b>13/-</b> | <b>-/-</b> | <b>12/14</b> | <b>-/-</b> | <b>9/-</b> | <b>15/16</b> |       |            |            |            |

\* The genotype of the femur is different from the genotype of the two tarsalia. It is either deeply contaminated (decontamination with bleach as for all other bones) or it is a sample from another individual.

\*\*\* Amplification with the Investigator ESSplex SE QS kit. Partly revealed some additional unspecific products.

Negative controls for the PCRs revealed no amplification.

**Autosomal STR amplification results for II/53 7. skeleton – Göttingen**

| Individual (Sample)          | Extract no. | µl Ex in PCR | Amelo      | D13S317     | D21S11         | D18S51            | TH01        | D5S818      | FGA             | D16S539      | D22S1045    | D2S441       | D3S1358     | VWA         | D1S1656     | D19S433            | SE33       | D10S1248     | D12S391    | D8S1179     | D2S1338    | D7S820         | D9S1120     | PCR # | Run        |            |
|------------------------------|-------------|--------------|------------|-------------|----------------|-------------------|-------------|-------------|-----------------|--------------|-------------|--------------|-------------|-------------|-------------|--------------------|------------|--------------|------------|-------------|------------|----------------|-------------|-------|------------|------------|
| II/53 7. skeleton (HU 53 St) | Ex 1        | 1            | X/Y        | 12/13       | 29.2/-         | 14/15/19          | 7/10        | 12/-        | 22/-            |              |             |              |             |             |             |                    |            |              |            |             |            |                |             | 2     | 2014.06.30 |            |
|                              | Ex 1        | 5            | X/Y        | 12/-        | (26)/(28)      | (12)/(14)/15      | 6/8/9/10    | 11/12       | 20/22/(24)      |              |             |              |             |             |             |                    |            |              |            |             |            |                |             | 1     | 2014.06.06 |            |
|                              | Ex 2        | 1            | -/-        | -/-         | 27/-           | -/-               | -/-         | -/-         | -/-             |              |             |              |             |             |             |                    |            |              |            |             |            |                |             | 2a    | 2014.06.30 |            |
|                              | Ex 2        | 5            | -/-        | 12/-        | -/-            | 14/-              | 10/-        | 11/-        | -/-             |              |             |              |             |             |             |                    |            |              |            |             |            |                |             | 2b    | 2014.06.30 |            |
|                              | Ex 1        | 2            | X/Y        |             | -/-            | 14/15             | 8/10        |             | -/-             | 11/13        | 12/14       | 11/12/14     | -/-         | -/-         | 15/-        | 13/-               | -/-        | 13/-         | -/-        | 14/-        | -/-        |                |             | 14    | 2015.08.15 |            |
|                              | Ex 3        | 1            | X/Y        | 12/-        | 28/-           | 15/-              | -/-         | 12/13       | 20/22/24        |              |             |              |             |             |             |                    |            |              |            |             |            |                |             |       | 8a         | 2014.12.01 |
|                              | Ex 3        | 3            | X/Y        | 12/-        | 26/28          | 14/19             | 8/10        | 12/-        | 20/22/24        |              |             |              |             |             |             |                    |            |              |            |             |            |                |             |       | 8b         | 2014.12.01 |
|                              | Ex 4        | 1            | X/Y        | 12/-        | 26/-           | 14/15             | 8/9/9.3/10  | 12/-        | 20/22/24        |              |             |              |             |             |             |                    |            |              |            |             |            |                |             |       | 8a         | 2014.12.01 |
|                              | Ex 4        | 3            | X/Y        | 8/12        | 28/-           | 14/15             | 8/10        | 11/12/13    | 20/22/24        |              |             |              |             |             |             |                    |            |              |            |             |            |                |             |       | 8b         | 2014.12.01 |
| Ex 4                         | 2           | Y/-          |            | -/-         | -/-            | -/-               |             | -/-         | -/-             | -/-          | 12/14       | -/-          | -/-         | -/-         | -/-         | -/-                | -/-        | 13/-         | -/-        | -/-         | -/-        |                |             | 14    | 2015.08.15 |            |
| II/53 7. skeleton (HU 53 Co) | Ex 5        | 1            | Y/-        | 12/-        | -/-            | -/-               | 10/-        | 12/-        | -/-             |              |             |              |             |             |             |                    |            |              |            |             |            |                |             | 13a   | 2015.08.10 |            |
|                              | Ex 5        | 3            | X/Y        | 12/-        | 26/-           | -/-               | 8/10        | -/-         | -/-             |              |             |              |             |             |             |                    |            |              |            |             |            |                |             |       | 13b        | 2015.08.10 |
|                              | Ex 5        | 3            | X/Y        |             | -/-            | 15/-              | 8/9.3/10    |             | -/-             | -/-          | 15/-        | 12/(14)      | -/-         | (16.2)/(17) | -/-         | -/-                | -/-        | (13)/-       | -/-        | -/-         | -/-        |                |             |       | 15a***     | 2015.08.20 |
|                              | Ex 5        | 5            | X/Y        |             | 32.2           | 14/19             | 10/-        |             | -/-             | 12/13        | 14/-        | 12/14        | -/-         | -/-         | 11/-        | 13/-               | -/-        | 13/-         | 18/(25)    | 13/-        | -/-        |                |             |       | 15b***     | 2015.08.20 |
|                              | Ex 5        | 3            | X/Y        |             | -/-            | -/-               | 8/10        |             | -/-             | 12/13        | 14/-        | 12/14        | -/-         | -/-         | 15/-        | -/-                | -/-        | 13/-         | -/-        | -/-         | -/-        |                |             |       | 16a        | 2015.08.29 |
|                              | Ex 5        | 5            | X/Y        |             | 31/-           | 11/-              | 8/10        |             | -/-             | 12/13        | 14/15       | 12/14        | 16/-        | -/-         | -/-         | -/-                | -/-        | 13/-         | -/-        | -/-         | -/-        |                |             |       | 16b        | 2015.08.29 |
|                              | Ex 5        | 3            | X/Y        |             | 26/-           |                   |             |             |                 | (9)/12/(13)  |             |              | 14/16       | 17/18/19    |             | 13/14/17.2         |            |              |            | 14/-        | 18/-       | 10/(12)        | 16/-        |       | 17a        | 2015.10.21 |
|                              | Ex 5        | 5            | X/Y        |             | -/-            |                   |             |             |                 | (9)/12/(13)  |             |              | 14/16/17/18 | (25)/-      |             | 13/14/17.2         |            |              |            | 14/-        | -/-        | 10/12          | 16/-        |       | 17b        | 2015.10.21 |
|                              | Ex 5        | 0.5          | X/Y        |             | -/-            |                   |             |             |                 | -/-          |             |              | 14/-        | 19/-        |             | 13/17.2            |            |              |            | -/-         | -/-        | -/-            | -/-         |       | 18a        | 2015.11.30 |
|                              | Ex 5        | 1            | X/Y        |             | -/-            |                   |             |             |                 | 12/-         |             |              | 14/-        | -/-         |             | 14/17.2            |            |              |            | -/-         | -/-        | 10/-           | 16/-        |       | 18b        | 2015.11.30 |
|                              | Ex 5        | 0.5          | Y/-        |             | -/-            | 14/-              | 8/10        |             | -/-             | 12/-         | -/-         | 14/-         | -/-         | -/-         | -/-         | -/-                | -/-        | 13/-         | -/-        | -/-         | -/-        |                |             |       | 19a        | 2015.11.30 |
| Ex 5                         | 1           | X/Y          |            | -/-         | 14/-           | -/-               |             | -/-         | 12/13           | -/-          | 12/14       | -/-          | -/-         | -/-         | -/-         | -/-                | 13/-       | -/-          | -/-        | -/-         |            |                |             | 19b   | 2015.11.30 |            |
| <b>Fingerprint</b>           |             |              | <b>X/Y</b> | <b>12/-</b> | <b>26/(28)</b> | <b>14/15/(19)</b> | <b>8/10</b> | <b>12/-</b> | <b>20/22/24</b> | <b>12/13</b> | <b>14/-</b> | <b>12/14</b> | <b>14/-</b> | <b>19/-</b> | <b>15/-</b> | <b>13/14/17.2*</b> | <b>-/-</b> | <b>13/13</b> | <b>-/-</b> | <b>14/-</b> | <b>-/-</b> | <b>10/(12)</b> | <b>16/-</b> |       |            |            |

\* The allele 17.2 does only show up with the decaplex kit. Artefact?

\*\*\* Amplification with the Investigator ESSplex SE QS kit. Partly revealed some additional unspecific products.

Negative controls for the PCRs revealed no amplification.

## Autosomal STR amplification results for II/54 9. skeleton – Göttingen

| Individual (Sample)          | Extract no. | µl Ex in PCR | Amelo | D13S317 | D21S11 | D18S51   | TH01  | D5S818 | FGA    | D16S539 | D22S1045 | D2S441 | D3S1358 | VWA   | D1S1656 | D19S433     | SE33    | D10S1248 | D12S391 | D8S1179 | D2S1338 | D7S820 | D9S1120 | PCR # | Run |            |            |            |
|------------------------------|-------------|--------------|-------|---------|--------|----------|-------|--------|--------|---------|----------|--------|---------|-------|---------|-------------|---------|----------|---------|---------|---------|--------|---------|-------|-----|------------|------------|------------|
| II/54 9. skeleton (HU 54 Co) | Ex 1        | 1            | X/Y   | 11/13   | 29/-   | 14/17    | 6/9.3 | 9/11   | 21/23  |         |          |        |         |       |         |             |         |          |         |         |         |        |         |       | 3a  | 2014.07.01 |            |            |
|                              | Ex 1        | 5            | X/Y   | 11/13   | 29/-   | 14/17    | 6/9.3 | 9/11   | 21/23  |         |          |        |         |       |         |             |         |          |         |         |         |        |         |       |     | 3b         | 2014.07.01 |            |
|                              | Ex 2        | 1            | X/-   | -/-     | -/-    | 14/-     | -/-   | 11/-   | -/-    |         |          |        |         |       |         |             |         |          |         |         |         |        |         |       |     | 3a         | 2014.07.01 |            |
|                              | Ex 2        | 5            | X/Y   | 11/-    | 29/-   | -/-      | 6/-   | -/-    | -/-    |         |          |        |         |       |         |             |         |          |         |         |         |        |         |       |     |            | 3b         | 2014.07.01 |
|                              | Ex 1        | 2            | X/Y   |         | 29/-   | 14/17    | 6/9.3 |        | 21/23  | 11/12   | 14/15    | 10/11  | 16/17   | 14/16 | 15/17   | 13/14       | 18/28.2 | 13/15    | 23/-    | 11/14   | 21/-    |        |         |       |     | 14         | 2015.08.15 |            |
|                              | Ex 3        | 1            | X/Y   | 11/13   | 29/-   | 14/16/17 | 6/9.3 | 9/11   | 21/23  |         |          |        |         |       |         |             |         |          |         |         |         |        |         |       |     |            | 8a         | 2014.12.01 |
|                              | Ex 3        | 3            | X/Y   | 11/13   | -/-    | -/-      | 6/9.3 | -/-    | -/-    |         |          |        |         |       |         |             |         |          |         |         |         |        |         |       |     |            | 8b         | 2014.12.01 |
|                              | Ex 4        | 1            | X/Y   | 11/13   | 29/30  | 14/17    | 6/9.3 | 9/-    | 21/23  |         |          |        |         |       |         |             |         |          |         |         |         |        |         |       |     |            | 8a         | 2014.12.01 |
|                              | Ex 4        | 3            | X/Y   | 11/13   | 29/-   | 14/17    | 6/9.3 | 9/11   | 21/23  |         |          |        |         |       |         |             |         |          |         |         |         |        |         |       |     |            | 8b         | 2014.12.01 |
| Ex 3                         | 2           | X/-          |       | 29/30   | 17/-   | 6/9.3    |       | 21/-   | 11/-   | 14/-    | 10/-     | 17/-   | 16/-    | 15/-  | 13/-    | 18/-        | 13/16   | 23/-     | 14/-    | -/-     |         |        |         |       | 14  | 2015.08.15 |            |            |
| II/54 9. skeleton (HU 54 Fe) | Ex 5        | 1            | X/Y   | 13/-    | 29/-   | 14/17    | 9.3/- | 9/-    | 21/-   |         |          |        |         |       |         |             |         |          |         |         |         |        |         |       |     | 13a        | 2015.08.10 |            |
|                              | Ex 5        | 3            | X/Y   | 11/13   | 29/-   | 14/17    | 6/9.3 | 9/11   | 21/23  |         |          |        |         |       |         |             |         |          |         |         |         |        |         |       |     |            | 13b        | 2015.08.10 |
|                              | Ex 5        | 3            | X/Y   |         | -/-    | 17/-     | 6/9.3 |        | -/-    | 12/-    | -/-      | -/-    | 17/-    | 14/-  | -/-     | -/-         | -/-     | (13)/-   | -/-     | -/-     | -/-     |        |         |       |     |            | 15a***     | 2015.08.20 |
|                              | Ex 5        | 5            | X/Y   |         | -/-    | 14/17    | 6/-   |        | 21/-   | 11/12   | (14)/15  | 10/11  | -/-     | 16/-  | 15/(16) | 14/-        | -/-     | 13/15    | 19/-    | 11/-    | -/-     |        |         |       |     |            | 15b***     | 2015.08.20 |
|                              | Ex 5        | 1            | X/Y   |         | -/-    | -/-      | 9.3/- |        | -/-    | 11/-    | -/-      | 10/11  | -/-     | -/-   | -/-     | 14/-        | -/-     | 15/-     | -/-     | -/-     | -/-     |        |         |       |     |            | 16a        | 2015.08.29 |
|                              | Ex 5        | 3            | X/Y   |         | -/-    | 15/17    | 6/9.3 |        | (23)/- | 12/-    | 14/15    | 10/11  | -/-     | 14/-  | 15/-    | 14/-        | 28.2/-  | 13/-     | 23/-    | -/-     | -/-     |        |         |       |     |            | 16b        | 2015.08.29 |
|                              | Ex 5        | 3            | X/Y   |         | 29/-   |          |       |        |        | 12/-    |          |        | 16/17   | 16/-  |         | 13/14/17.2  |         |          |         | 14/-    | -/-     | -/-    | 15/16   |       |     | 17a        | 2015.10.21 |            |
|                              | Ex 5        | 5            | X/Y   |         | 29/-   |          |       |        |        | 11/12   |          |        | 16/17   | 14/-  |         | 14/17.2     |         |          |         | 11/-    | 21/23   | 11/-   | 16/-    |       |     | 17b        | 2015.10.21 |            |
|                              | Ex 5        | 0.5          | X/-   |         | -/-    |          |       |        |        | -/-     |          |        | 16/-    | -/-   |         | 13/14       |         |          |         | -/-     | -/-     | 11/-   | 15/-    |       |     | 18a        | 2015.11.30 |            |
|                              | Ex 5        | 1            | -/-   |         | -/-    |          |       |        |        | 11/-    |          |        | 16/-    | -/-   |         | 13/17.2     |         |          |         | -/-     | 21/-    | -/-    | 16/-    |       |     | 18b        | 2015.11.30 |            |
|                              | Ex 5        | 0.5          | X/-   |         | -/-    | -/-      | 6/-   |        | -/-    | 11/-    | -/-      | 10/-   | -/-     | -/-   | -/-     | -/-         | -/-     | -/-      | -/-     | -/-     | -/-     | -/-    |         |       |     | 19a        | 2015.11.30 |            |
| Ex 5                         | 1           | Y/-          |       | -/-     | 17/-   | 6/9.3    |       | 21/-   | 11/-   | -/-     | 10/-     | -/-    | -/-     | 15/17 | -/-     | (18)/-      | 15/-    | -/-      | 11/-    | -/-     |         |        |         |       | 19b | 2015.11.30 |            |            |
| Fingerprint                  |             |              | X/Y   | 11/13   | 29(30) | 14/17    | 6/9.3 | 9/11   | 21/23  | 11/12   | 14/15    | 10/11  | 16/17   | 14/16 | 15/17   | 13/14/17.2* | 18/28.2 | 13/15    | 23/-    | 11/14   | 21/-    | 11/-   | 15/16   |       |     |            |            |            |

\* The allele 17.2 does only show up with the decaplex kit. Artefact?

\*\*\* Amplification with the Investigator ESSplex SE QS kit. Partly revealed some additional unspecific products.

Negative controls for the PCRs revealed no amplification.

## Autosomal STR amplification results for II/55 10. skeleton – Göttingen

| Individual (Sample)                 | Extract no. | µl Ex in PCR | Amelo | D13S317 | D21S11 | D18S51 | TH01  | D5S818 | FGA   | D16S539 | D22S1045 | D2S441 | D3S1358 | VWA     | D1S1656 | D19S433      | SE33          | D10S1248 | D12S391 | D8S1179 | D2S1338 | D7S820 | D9S1120 | PCR # | Run        |            |            |
|-------------------------------------|-------------|--------------|-------|---------|--------|--------|-------|--------|-------|---------|----------|--------|---------|---------|---------|--------------|---------------|----------|---------|---------|---------|--------|---------|-------|------------|------------|------------|
| II/55<br>10. skeleton<br>(HU 55 Co) | Ex 1        | 1            | X/Y   | 11/13   | 30/31  | 12/16  | 6/9.3 | 11/12  | 22/23 |         |          |        |         |         |         |              |               |          |         |         |         |        |         | 2     | 2014.06.30 |            |            |
|                                     | Ex 1        | 5            | X/Y   | -/-     | -/-    | -/-    | 6/9.3 | -/-    | -/-   |         |          |        |         |         |         |              |               |          |         |         |         |        |         |       | 1          | 2014.06.06 |            |
|                                     | Ex 2        | 1            | -/-   | -/-     | -/-    | -/-    | -/-   | -/-    | 23/-  |         |          |        |         |         |         |              |               |          |         |         |         |        |         |       | 2a         | 2014.06.30 |            |
|                                     | Ex 2        | 5            | X/Y   | 9/11/13 | 30/-   | -/-    | -/-   | -/-    | 22/-  |         |          |        |         |         |         |              |               |          |         |         |         |        |         |       | 2b         | 2014.06.30 |            |
|                                     | Ex 1        | 2            | X/Y   |         | 30/31  | 12/16  | 6/9.3 |        | 22/23 | 12/13   | 12/15    | 11/-   | 14/16   | 16/-    | 15.3/16 | 13/14        | 26.2/34.2     | 13/14    | 17/22   | 13/-    | 17/24   |        |         |       | 14         | 2015.08.15 |            |
|                                     | Ex 3        | 1            | X/Y   | 11/13   | 31/-   | -/-    | 6/9.3 | 11/-   | 23/-  |         |          |        |         |         |         |              |               |          |         |         |         |        |         |       |            | 7a         | 2014.09.29 |
|                                     | Ex 3        | 5            | X/Y   | 11/13   | 30/31  | 12/16  | 9.3/- | 10/11  | 22/23 |         |          |        |         |         |         |              |               |          |         |         |         |        |         |       |            | 7b         | 2014.09.29 |
|                                     | Ex 4        | 1            | X/Y   | 11/13   | 30/-   | 12/16  | 6/9.3 | 11/12  | 22/23 |         |          |        |         |         |         |              |               |          |         |         |         |        |         |       |            | 7a         | 2014.09.29 |
|                                     | Ex 4        | 5            | X/Y   | 11/13   | 30/31  | 12/16  | 6/9.3 | 11/12  | 22/23 |         |          |        |         |         |         |              |               |          |         |         |         |        |         |       |            | 7b         | 2014.09.29 |
|                                     | Ex 5        | 1            | X/Y   | 11/13   | 28/31  | 12/16  | 6/9.3 | 11/12  | 22/23 |         |          |        |         |         |         |              |               |          |         |         |         |        |         |       |            | 8a         | 2014.12.01 |
|                                     | Ex 5        | 3            | X/Y   | 11/13   | 30/31  | 12/16  | 6/9.3 | 11/-   | 22/23 |         |          |        |         |         |         |              |               |          |         |         |         |        |         |       |            | 8b         | 2014.12.01 |
|                                     | Ex 6        | 1            | X/Y   | 11/13   | 30/31  | 12/16  | 6/9.3 | 11/12  | 22/23 |         |          |        |         |         |         |              |               |          |         |         |         |        |         |       |            | 8a         | 2014.12.01 |
|                                     | Ex 6        | 3            | X/Y   | 11/13   | 30/31  | 12/16  | 6/9.3 | 11/12  | 22/23 |         |          |        |         |         |         |              |               |          |         |         |         |        |         |       |            | 8b         | 2014.12.01 |
| Ex 5                                | 2           | Y/-          |       | 30/-    | -/-    | 6/-    |       | -/-    | -/-   | 12/15   | 11/-     | -/-    | -/-     | 16/-    | -/-     | -/-          | -/-           | -/-      | -/-     | -/-     | 24/-    |        |         | 14    | 2015.08.15 |            |            |
| II/55<br>10. skeleton<br>(HU 55 Fe) | Ex 7        | 1            | X/Y   | 11/13   | 30/31  | 12/16  | 6/9.3 | 11/12  | 22/23 |         |          |        |         |         |         |              |               |          |         |         |         |        |         |       | 13a        | 2015.08.10 |            |
|                                     | Ex 7        | 3            | X/Y   | 11/13   | 30/31  | 12/16  | 6/9.3 | 11/12  | 22/23 |         |          |        |         |         |         |              |               |          |         |         |         |        |         |       |            | 13b        | 2015.08.10 |
|                                     | Ex 7        | 1            | X/Y   |         | 30/31  | 12/16  | 6/9.3 |        | 22/23 | 12/13   | 12/15    | 11/-   | 14/16   | 16/16.2 | 15.3/16 | 13/14        | (26.2)/(34.2) | 13/14    | 17/22   | 13/-    | (17)/-  |        |         |       | 15a***     | 2015.08.20 |            |
|                                     | Ex 7        | 3            | X/Y   |         | 30/31  | 12/16  | 6/9.3 |        | 22/23 | 12/13   | 12/15    | 11/-   | 14/16   | 16/-    | 15.3/16 | 13/14        | 26.2/34.2     | 13/14    | 17/22   | 13/-    | 21/24   |        |         |       | 15b***     | 2015.08.20 |            |
|                                     | Ex 7        | 3            | X/Y   |         | 30/31  | 12/16  | 6/9.3 |        | 22/23 | 12/13   | 12/15    | 11/-   | 14/16   | 16/-    | 15.3/16 | 13/14        | 26.2/34.2     | 13/14    | 17/22   | 13/-    | 17/24   |        |         |       | 16a        | 2015.08.29 |            |
|                                     | Ex 7        | 5            | X/Y   |         | 30/31  | 12/16  | 6/9.3 |        | 22/23 | 12/13   | 12/15    | 11/-   | 14/16   | 16/-    | 15.3/16 | 13/14        | 26.2/34.2     | 13/14    | 17/22   | 13/-    | 17/24   |        |         |       | 16b        | 2015.08.29 |            |
|                                     | Ex 7        | 1            | X/Y   |         | 30/31  |        |       |        |       | 12/13   |          |        | 14/16   | 16/-    |         | 13/14        |               |          |         | 13/-    | 17/24   | 9/10   | 15/16   |       | 17a        | 2015.10.21 |            |
|                                     | Ex 7        | 3            | X/Y   |         | 30/31  |        |       |        |       | 12/13   |          |        | 14/16   | 16/-    |         | 13/14/(17.2) |               |          |         | 13/-    | 17/24   | 9/10   | 15/16   |       | 17b        | 2015.10.21 |            |
| Fingerprint                         |             |              | X/Y   | 11/13   | 30/31  | 12/16  | 6/9.3 | 11/12  | 22/23 | 12/13   | 12/15    | 11/11  | 14/16   | 16/16   | 15.3/16 | 13/14        | 26.2/34.2     | 13/14    | 17/22   | 13/13   | 17/24   | 9/10   | 15/16   |       |            |            |            |

\*\*\* Amplification with the Investigator ESSplex SE QS kit. Partly revealed some additional unspecific products.  
Negative controls for the PCRs revealed no amplification.

## Autosomal STR amplification results for II/109 8. skeleton – Göttingen

| Individual (Sample)            | Extract no. | µl Ex in PCR | Amelo | D13S317 | D21S11       | D18S51     | TH01       | D5S818 | FGA     | D16S539   | D22S1045 | D2S441   | D3S1358  | VWA         | D1S1656  | D19S433   | SE33           | D10S1248 | D12S391  | D8S1179 | D2S1338    | D7S820    | D9S1120 | PCR # | Run |            |            |            |            |            |
|--------------------------------|-------------|--------------|-------|---------|--------------|------------|------------|--------|---------|-----------|----------|----------|----------|-------------|----------|-----------|----------------|----------|----------|---------|------------|-----------|---------|-------|-----|------------|------------|------------|------------|------------|
| II/109 8. skeleton (HU 109 Co) | Ex 1        | 1            | X/-   | 9/11    | 31/33.2      | 14/15      | 8/9        | 11/-   | -/-     |           |          |          |          |             |          |           |                |          |          |         |            |           |         |       | 3a  | 2014.07.01 |            |            |            |            |
|                                | Ex 1        | 5            | X/-   | 9/11    | -/-          | -/-        | 8/9        | 11/-   | -/-     |           |          |          |          |             |          |           |                |          |          |         |            |           |         |       |     | 3b         | 2014.07.01 |            |            |            |
|                                | Ex 2        | 1            | -/-   | -/-     | -/-          | -/-        | -/-        | -/-    | -/-     |           |          |          |          |             |          |           |                |          |          |         |            |           |         |       |     | 3a         | 2014.07.01 |            |            |            |
|                                | Ex 2        | 5            | X/-   | 9/-     | -/-          | -/-        | -/-        | -/-    | -/-     |           |          |          |          |             |          |           |                |          |          |         |            |           |         |       |     | 3b         | 2014.07.01 |            |            |            |
|                                | Ex 1        | 2            | X/Y   |         | 32.2/33.2    | -/-        | 8/(9)/(10) |        | 22/-    | 10/13     | 15/16    | 10/11/14 | 15/-     | 14/17/19    | 12/-     | -/-       | 19.2/-         | 14/15/16 | 17/23    | 12/15   | -/-        |           |         |       |     | 14         | 2015.08.15 |            |            |            |
|                                | Ex 3        | 1            | X/-   | 9/11    | -/-          | 14/15      | 8/9        | 11/-   | 22/-    |           |          |          |          |             |          |           |                |          |          |         |            |           |         |       |     |            | 8a         | 2014.12.01 |            |            |
|                                | Ex 3        | 3            | X/-   | 9/11    | -/-          | 14/15      | 8/9        | 11/-   | 22/-    |           |          |          |          |             |          |           |                |          |          |         |            |           |         |       |     |            |            | 8b         | 2014.12.01 |            |
|                                | Ex 4        | 1            | X/-   | 9/11    | 31/33.2      | 14/15      | 8/9        | 11/-   | 22/-    |           |          |          |          |             |          |           |                |          |          |         |            |           |         |       |     |            |            | 8a         | 2014.12.01 |            |
|                                | Ex 4        | 3            | X/-   | 9/11    | 31/33.2      | 14/15      | 8/9        | 11/-   | 22/-    |           |          |          |          |             |          |           |                |          |          |         |            |           |         |       |     |            |            |            | 8b         | 2014.12.01 |
| Ex 4                           | 2           | X/-          |       | -/-     | 14/-         | 8/-        |            | -/-    | 10/13   | 16/-      | 11/-     | 14/15    | 14/-     | 11/12/16    | -/-      | 19.2/29.2 | 14/15          | 23/-     | -/-      | -/-     |            |           |         |       |     | 14         | 2015.08.15 |            |            |            |
| II/109 8. skeleton (HU 109 Ve) | Ex 5        | 1            | X/Y   | 9/11    | 31/-         | 14/15      | 8/9        | 11/-   | 22/-    |           |          |          |          |             |          |           |                |          |          |         |            |           |         |       |     |            | 13a        | 2015.08.10 |            |            |
|                                | Ex 5        | 3            | X/-   | 9/11    | (28)/31/33.2 | 14/15/(16) | 8/9        | 11/12  | (19)/22 |           |          |          |          |             |          |           |                |          |          |         |            |           |         |       |     |            |            | 13b        | 2015.08.10 |            |
|                                | Ex 5        | 3            | X/-   |         | 31/33.2      | 14/15      | 8/9        |        | 20/22   | 10/13     | 15/16    | 11/14    | 13/15/18 | 14/19       | 12/-     | 13/-      | 19.2/29.2      | 14/15    | 17/22/23 | 12/-    | -/-        |           |         |       |     |            |            | 15a***     | 2015.08.20 |            |
|                                | Ex 5        | 5            | X/-   |         | -/-          | 14/15      | 8/9        |        | 22/-    | 10/13     | 15/16    | 11/14    | 15/17/18 | 19/-        | -/-      | 13/-      | 19.2/21.2/29.2 | 14/15    | 17/23    | 12/15   | 19/-       |           |         |       |     |            |            | 15b***     | 2015.08.20 |            |
|                                | Ex 5        | 3            | X/-   |         | (27)/(31)    | 14/-       | 8/9        |        | 22/-    | 10/13     | 15/16    | 11/14    | 15/17/18 | 14/-        | 12/13/16 | 13/-      | 19.2/21.2      | 14/15    | 17/23    | 15/-    | 19/-       |           |         |       |     |            |            | 16a        | 2015.08.29 |            |
|                                | Ex 5        | 5            | X/-   |         | 28/31        | 14/15      | 8/9        |        | 22/24   | 10/13     | 15/16    | 11/14    | 15/17/18 | 16/19       | 12/16    | 13/-      | 19.2/29.2      | 14/15    | 17/23    | 15/-    | 18/-       |           |         |       |     |            |            | 16b        | 2015.08.29 |            |
|                                | Ex 5        | 3            | X/-   |         | 27/(30)/31   |            |            |        |         | 10(11)/13 |          |          | 15/18    | 14/19       |          | 13/-      |                |          |          | 12/15   | 18/19      | 8/10      | 15/-    |       |     |            |            | 17a        | 2015.10.21 |            |
|                                | Ex 5        | 5            | X/-   |         | 31/33.2      |            |            |        |         | 10/13     |          |          | 14/15/18 | 14/16/17/19 |          | 13/-      |                |          |          | 12/15   | 18/19/23   | 8/10/(12) | 15/16   |       |     |            |            | 17b        | 2015.10.21 |            |
|                                | Ex 5        | 0.5          | X/-   |         | -/-          |            |            |        |         | 10/13     |          |          | 15/18    | 14/19       |          | 13/15     |                |          |          | -/-     | 18/19      | 8/10      | 15/16   |       |     |            |            | 18a        | 2015.11.30 |            |
|                                | Ex 5        | 1            | X/-   |         | 28/31        |            |            |        |         | 10/13     |          |          | 15/18    | 14/19       |          | 13/14     |                |          |          | 12/15   | 18/19/(25) | 8/10      | 15/16   |       |     |            |            | 18b        | 2015.11.30 |            |
|                                | Ex 5        | 0.5          | X/-   |         | 33.2/-       | -/-        | 8/9        |        | -/-     | 10/13     | 15/-     | 11/-     | -/-      | -/-         | 16/-     | -/-       | -/-            | 14/15    | -/-      | -/-     | -/-        |           |         |       |     |            |            |            | 19a        | 2015.11.30 |
|                                | Ex 5        | 1            | X/-   |         | -/-          | 14/15      | 8/9        |        | 20/-    | 10/13     | 11/14/15 | 11/14    | 15/18    | -/-         | 12/13/16 | -/-       | -/-            | 14/15    | 17/-     | -/-     | -/-        |           |         |       |     |            |            |            | 19b        | 2015.11.30 |
| Fingerprint                    |             |              | X/-   | 9/11    | 31/33.2      | 14/15      | 8/9        | 11/-   | 22/-    | 10/13     | 15/16    | 11/14    | 15/18    | 14/19       | 12/16    | 13/-      | 19.2/29.2      | 14/15    | 17/23    | 12/15   | 18/19      | 8/10      | 15/16   |       |     |            |            |            |            |            |

\* In some of the STRs there are additional alleles showing up reproducibly. Uncertain whether stutter artefacts or a minor contamination component.

\*\*\* Amplification with the Investigator ESSplex SE QS kit. Partly revealed some additional unspecific products.

Negative controls for the PCRs revealed no amplification.
