# Supplementary material for: DNA profiling of Hungarian King Béla III and other skeletal remains originating from the Royal Basilica of Székesfehérvár
Source: Springer Nature journal article supplement (doi:10.1007/s12520-018-0609-7), 2018-02-10
Supplement: 12520_2018_609_MOESM10_ESM.pdf [file 12520_2018_609_MOESM10_ESM.pdf]

## **DNA profiling of Hungarian King Béla III and other skeletal remains originating from the Royal Basilica of Székesfehérvár**

Judit Olasz<sup>1a</sup>, Verena Seidenberg<sup>2</sup>, Susanne Hummel<sup>2</sup>, Zoltán Szentirmay<sup>1</sup>, György Szabados<sup>3</sup>, Béla Melegh<sup>4</sup>, Miklós Kásler<sup>1</sup>

<sup>1</sup>National Institute of Oncology, <sup>a</sup>Department of Pathogenetics, Ráth Gy. u. 7-9, 1122 Budapest, Hungary; <sup>2</sup>Historic Anthropology and Human Ecology, Johann-Friederich Blumenbach-Institute of Zoology and Anthropology, University of Göttingen, Bürgerstr. 50, 37073 Göttingen, Germany; <sup>3</sup>King St. Stephen Museum, Fő u. 6, 8000 Székesfehérvár, Hungary; <sup>4</sup>Department of Medical Genetics, University of Pécs, Szigeti u. 12, 7624 Pécs, Hungary

Corresponding author: olasz@oncol.hu

**ESM 10 Detailed sequencing results for the mitochondrial control regions of King Béla III, Anna of Antioch and person II/52**

# 1. Béla III

16009 **TTAAACTATTCTCTGTTCTTTCATGGGGAAGCAGATTTGGGTACCACCAAGTATTGACTCACCATCAACAACCGCTATGTATTTTCGTACATTACTGCCAGCCACCATGAATATTGTACG** 16129<sup>1</sup>  
TTAAACTATTCTCTGTTCTTTCATGGGGAAGCAGATTTGGGTACCACCAAGTATTGACTCACCATCAACAACCGCTATGTATTTTCGTACATTACTGCCAGCCACCATGAATATTGTACG BT2  
TTAAACTATTCTCTGTTCTTTCATGGGGAAGCAGATTTGGGTACCACCAAGTATTGACTCACCATCAACAACCGCTATGTATTTTCGTACATTACTGCCAGCCACCATGAATATTGTACG BT3\*

**Cons. TTAAACTATTCTCTGTTCTTTCATGGGGAAGCAGATTTGGGTACCACCAAGTATTGACTCACCATCAACAACCGCTATGTATTTTCGTACATTACTGCCAGCCACCATGAATATTGTACG**

16113 **AGCCACCATGAATATTGTACGGTACCATAAATACTTGACCACCTGTAGTACATAAAAAACCAATCCACATCAAAACCCCCCCCCATGCTTACAAGCAAGTACAGCAATCAACCCCTCAA** 16227  
AGCCACCATGAATATTGTACGGTACCATAAATACTTGACCACCTGTAGTACATAAAAAACCAATCCACATCAAAACCCCCCCCCATGCTTACAAGCAAGTACAGCAATCAACCCCTCAA BT1  
AGCCACCATGAATATTGTACGGTACCATAAATACTTGACCACCTGTAGTACATAAAAAACCAATCCACATCAAAACCCCCCCCCATGCTTACAAGCAAGTACAGCAATCAACCCCTCAA BT3\*  
AGCCACCATGAATATTGTACGGTACCATAAATACTTGACCACCTGTAGTACATAAAAAACCAATCCACATCAAAACCCCCCCCCATGCTTACAAGCAAGTACAGCAATCAACCCCTCAA BT3\*

**Cons. AGCCACCATGAATATTGTACGGTACCATAAATACTTGACCACCTGTAGTACATAAAAAACCAATCCACATCAAAACCCCCCCCCATGCTTACAAGCAAGTACAGCAATCAACCCCTCAA**

16222 **CCTCAACTATCACACATCAACTGCAACTCCAAAGCCACCCCTCACCCACTAGGATACCAACAAACCTACCACCCCTTAACAGTACATAGTACATAAAGCCATTTACCGTACATAGCACATTACAGTCAAATCCCTTCTCGTCCCATGGATGACCCCCCTCAGATAGGGGTCCCTTGACCACCATCCCTC** 16411  
CCTCAACTATCACACATCAACTGCAACTCCAAAGCCACCCCTCACCCACTAGGATACCAACAAACCTACCACCCCTTAACAGTACATAGTACATAAAGCCATTTACCGTACATAGCACATTACAGTCAAATCCCTTCTCGTCCCATGGATGACCCCCCTCAGATAGGGGTCCCTTGACCACCATCCCTC BT1  
CCTCAACTATCACACATCAACTGCAACTCCAAAGCCACCCCTCACCCACTAGGATACCAACAAACCTACCACCCCTTAACAGTACATAGTACATAAAGCCATTTACCGTACATAGCACATTACAGTCAAATCCCTTCTCGTCCCATGGATGACCCCCCTCAGATAGGGGTCCCTTGACCACCATCCCTC BT3\*  
CCTCAACTATCACACATCAACTGCAACTCCAAAGCCACCCCTCACCCACTAGGATACCAACAAACCTACCACCCCTTAACAGTACATAGTACATAAAGCCATTTACCGTACATAGCACATTACAGTCAAATCCCTTCTCGTCCCATGGATGACCCCCCTCAGATAGGGGTCCCTTGACCACCATCCCTC BT3\*

**Cons. CCTCAACTATCACACATCAACTGCAACTCCAAAGCCACCCCTCACCCACTAGGATACCAACAAACCTACCACCCCTTAACAGTACATAGTACATAAAGCCATTTACCGTACATAGCACATTACAGTCAAATCCCTTCTCGTCCCATGGATGACCCCCCTCAGATAGGGGTCCCTTGACCACCATCCCTC**

16381 **TCAGATAGGGGTCCCTTGACCACCATCCCTCCGTGAAATCAATATCCCGCACAAAGTGTACTCTCCTCGTCCGGGCCATAAACACTTGGGGGTAGCTAAAGTGAAC** 16489  
TCAGATAGGGGTCCCTTGACCACCATCCCTCCGTGAAATCAATATCCCGCACAAAGTGTACTCTCCTCGTCCGGGCCATAAACACTTGGGGGTAGCTAAAGTGAAC BT1  
TCAGATAGGGGTCCCTTGACCACCATCCCTCCGTGAAATCAATATCCCGCACAAAGTGTACTCTCCTCGTCCGGGCCATAAACACTTGGGGGTAGCTAAAGTGAAC BT2  
TCAGATAGGGGTCCCTTGACCACCATCCCTCCGTGAAATCAATATCCCGCACAAAGTGTACTCTCCTCGTCCGGGCCATAAACACTTGGGGGTAGCTAAAGTGAAC BT3\*

**Cons. TCAGATAGGGGTCCCTTGACCACCATCCCTCCGTGAAATCAATATCCCGCACAAAGTGTACTCTCCTCGTCCGGGCCATAAACACTTGGGGGTAGCTAAAGTGAAC**

16471 **GGGTAGCTAAAGTGAACGTATCCGACATCTGGTTCCTACTTCAGGGTCATAAAGCCATAAATAGCCACACGTTCCCTTAAATAAGACATCAGATGGATCACAGGTCATCACCCCTATTAACCACTCAC** 33  
GGGTAGCTAAAGTGAACGTATCCGACATCTGGTTCCTACTTCAGGGTCATAAAGCCATAAATAGCCACACGTTCCCTTAAATAAGACATCAGATGGATCACAGGTCATCACCCCTATTAACCACTCAC BT1  
GGGTAGCTAAAGTGAACGTATCCGACATCTGGTTCCTACTTCAGGGTCATAAAGCCATAAATAGCCACACGTTCCCTTAAATAAGACATCAGATGGATCACAGGTCATCACCCCTATTAACCACTCAC BT2  
GGGTAGCTAAAGTGAACGTATCCGACATCTGGTTCCTACTTCAGGGTCATAAAGCCATAAATAGCCACACGTTCCCTTAAATAAGACATCAGATGGATCACAGGTCATCACCCCTATTAACCACTCAC BT3\*

**Cons. GGGTAGCTAAAGTGAACGTATCCGACATCTGGTTCCTACTTCAGGGTCATAAAGCCATAAATAGCCACACGTTCCCTTAAATAAGACATCAGATGGATCACAGGTCATCACCCCTATTAACCACTCAC**

16552 **AAATAAGACATCAGCATGGATCAGAGTCTATCACCCCTATTAACCACTCACGGGAGCTCTCCATGCATTTGGTATTTTCGCTGGGGGGTATGCACGGATAGCATTGCGAGACGCTGGAGCCGGAGCACCCCTATGTCGAGTATCTGTCTTTGATTCCTGCCTCATCTTAT** 155  
AAATAAMACATCAGCATGGATCAGAGTCTATCACCCCTATTAACCACTCACGGGAGCTCTCCATGCATTTGGTATTTTCGCTGGGGGGTATGCACGGATAGCATTGCGAGACGCTGGAGCCGGAGCACCCCTATGTCGAGTATCTGTCTTTGATTCCTGCCTCATCTTAT BT2  
AAATAAGACATCAGCATGGATCAGAGTCTATCACCCCTATTAACCACTCACGGGAGCTCTCCATGCATTTGGTATTTTCGCTGGGGGGTATGCACGGATAGCATTGCGAGACGCTGGAGCCGGAGCACCCCTATGTCGAGTATCTGTCTTTGATTCCTGCCTCATCTTAT BT3\*  
AAATAAGACATCAGCATGGATCAGAGTCTATCACCCCTATTAACCACTCACGGGAGCTCTCCATGCATTTGGTATTTTCGCTGGGGGGTATGCACGGATAGCATTGCGAGACGCTGGAGCCGGAGTACCCTATGTCGAGTATCTGTCTTTGATTCCTGCCTCATCTTAT BT3\*

**Cons. AAATAAGACATCAGCATGGATCAGAGTCTATCACCCCTATTAACCACTCACGGGAGCTCTCCATGCATTTGGTATTTTCGCTGGGGGGTATGCACGGATAGCATTGCGAGACGCTGGAGCCGGAGTACCCTATGTCGAGTATCTGTCTTTGATTCCTGCCTCATCTTAT**

133 **TTTGATTCCTGCCTCATCTTATTTATTCGACACCTACGTTCAATATTACAGGCGAACATACTACTAAAGTGTGTTAAATTAATGCTTTAGGACATAATAAACAATTTGAATGTCTGCACAGCCACTTT** 267  
TTTGATTCCTGCCTCATCTTATTTATTCGACACCTACGTTCAATATTACAGGCGAACATACTACTAAAGTGTGTTAAATTAATGCTTTAGGACATAATAAACAATTTGAATGTCTGCACAGCCACTTT BT1  
TTTGATTCCTGCCTCATCTTATTTATTCGACACCTACGTTCAATATTACAGGCGAACATACTACTAAAGTGTGTTAAATTAATGCTTTAGGACATAATAAACAATTTGAATGTCTGCACAGCCACTTT BT3\*  
TTTGATTCCTGCCTCATCTTATTTATTCGACACCTACGTTCAATATTACAGGCGAACATACTACTAAAGTGTGTTAAATTAATGCTTTAGGACATAATAAACAATTTGAATGTCTGCACAGCCACTTT BT3\*

**Cons. TTTGATTCCTGCCTCATCTTATTTATTCGACACCTACGTTCAATATTACAGGCGAACATACTACTAAAGTGTGTTAAATTAATGCTTTAGGACATAATAAACAATTTGAATGTCTGCACAGCCACTTT**

241 **ACAATTTGAATGTCTGCACAGCCACTTTCCACACAGACATCATAACAAAAAATTTCCACCAAAACCCCCCTCCCCCGCTTCTGGCCACAGCACTTAAACACATCTCTGCCAAACCCCAAAAACAAGA** 367  
ACAATTTGAATGTCTGCACAGCCACTTTCCACACAGACATCATAACAAAAAATTTCCACCAAAACCCCCCTCCCCCGCTTCTGGCCACAGCACTTAAACACATCTCTGCCAAACCCCAAAAACAAGA BT2  
ACAATTTGAATGTCTGCACAGCCACTTTCCACACAGACATCATAACAAAAAATTTCCACCAAAACCCCCCTCCCCCGCTTCTGGCCACAGCACTTAAACACATCTCTGCCAAACCCCAAAAACAAGA BT3\*  
ACAATTTGAATGTCTGCACAGCCACTTTCCACACAGACATCATAACAAAAAATTTCCACCAAAACCCCCCTCCCCCGCTTCTGGCCACAGCACTTAAACACATCTCTGCCAAACCCCAAAAACAAGA BT3\*

**Cons. ACAATTTGAATGTCTGCACAGCCACTTTCCACACAGACATCATAACAAAAAATTTCCACCAAAACCCCCCTCCCCCGCTTCTGGCCACAGCACTTAAACACATCTCTGCCAAACCCCAAAAACAAGA**

339 **ACATCTCTGCCAAACCCCAAAAACAAGAACCCTAACACCAGCCTAACAGATTTCAAATTTTATCTTTTGGCGGTATGCACTTTTAACAGTACACCCCA** 439  
ACATCTCTGCCAAACCCCAAAAACAAGAACCCTAACACCAGCCTAACAGATTTCAAATTTTATCTTTTGGCGGTATGCACTTTTAACAGTACACCCCA BT2  
ACATCTCTGCCAAACCCCAAAAACAAGAACCCTAACACCAGCCTAACAGATTTCAAATTTTATCTTTTGGCGGTATGCACTTTTAACAGTACACCCCA BT3\*

**Cons. ACATCTCTGCCAAACCCCAAAAACAAGAACCCTAACACCAGCCTAACAGATTTCAAATTTTATCTTTTGGCGGTATGCACTTTTAACAGTACACCCCA**

426 **ACAGTACACCCCAACTAACACATTTATTTCCCTCCCACTCCCATACTACTAATCTCATCAATACAACCCCGCCCATCTTACCCAGCACACACACACCGCTGCTAACCCCATACCCCGAACCAACCAACCCCAAGACACCCCCACAGTTTATGTAGCTTACCTC** 594  
ACAGTACACCCCAACTAACACATTTATTTCCCTCCCACTCCCATACTACTAATCTCATCAATACAACCCCGCCCATCTTACCCAGCACACACACACCGCTGCTAACCCCATACCCCGAACCAACCAACCCCAAGACACCCCCACAGTTTATGTAGCTTACCTC BT1  
ACAGTACACCCCAACTAACACATTTATTTCCCTCCCACTCCCATACTACTAATCTCATCAATACAACCCCGCCCATCTTACCCAGCACACACACACCGCTGCTAACCCCATACCCCGAACCAACCAACCCCAAGACACCCCCACAGTTTATGTAGCTTACCTC BT3\*  
ACAGTACACCCCAACTAACACATTTATTTCCCTCCCACTCCCATACTACTAATCTCATCAATACAACCCCGCCCATCTTACCCAGCACACACACACCGCTGCTAACCCCATACCCCGAACCAACCAACCCCAAGACACCCCCACAGTTTATGTAGCTTACCTC BT3\*

**Cons. ACAGTACACCCCAACTAACACATTTATTTCCCTCCCACTCCCATACTACTAATCTCATCAATACAACCCCGCCCATCTTACCCAGCACACACACACCGCTGCTAACCCCATACCCCGAACCAACCAACCCCAAGACACCCCCACAGTTTATGTAGCTTACCTC**

<sup>1</sup>The first lines in bold indicate the Cambridge Reference Sequence (NCBI Reference Sequence: NC\_012920.1)

\*Before DNA extraction, the bone powder was treated with additional 0.5% NaOCl for 7 minutes to remove the residual mitochondrial DNA contamination.

Y = C or T; M = A or C;

Cons.: Consensus sequence

## 2. Anna of Antioch

16009 **TTAAACTATTCTCTGTTCTTTCATGGGGAAGCAGATTGGGTACCACCAAGTATTGACTCACCCATCAACAACCGCTATGTATTTTCGTACATTACTGCCAGCCACCATGAATATTGTACG** 16129<sup>1</sup>  
TTAAACTATTCTCTGTTCTTTCATGGGGAAGCAGATTGGGTACCACCAAGTATTGACTCACCCATCAACAACCGCTATGTATTTTCGTACATTACTGCCAGCCACCATGAATATTGTACG AAC2  
TTAAACTATTCTCTGTTCTTTCATGGGGAAGCAGATTGGGTACCACCAAGTATTGACTCACCCATCAACAACCGCTATGTATTTTCGTACATTACTGCCAGCCACCATGAATATTGTACG AAC3  
**Cons. TTAAACTATTCTCTGTTCTTTCATGGGGAAGCAGATTGGGTACCACCAAGTATTGACTCACCCATCAACAACCGCTATGTATTTTCGTACATTACTGCCAGCCACCATGAATATTGTACG**

16113 **AGCCACCATGAATATTGTACGGTACCATAAATACTTGACCACCTGTAGTACATAAAAAACCAATCCACATCAAAACCCCTCCCATGCTTACAAGCAAGTACAGCAATCAACCCCTCAA** 16227  
AGCCACCATGAATATTGTACGGTACCATAAATACTTGACCACCTGTAGTACATAAAAAACCAATCCACATCAAAACCCCTCCCATGCTTACAAGCAAGTACAGCAATCAACCCCTCAA AAC1  
AGCCACCATGAATATTGTACGGTACCATAAATACTTGACCACCTGTAGTACATAAAAAACCAATCCACATCAAAACCCCTCCCATGCTTACAAGCAAGTACAGCAATCAACCCCTCAA AAC2  
**Cons. AGCCACCATGAATATTGTACGGTACCATAAATACTTGACCACCTGTAGTACATAAAAAACCAATCCACATCAAAACCCCTCCCATGCTTACAAGCAAGTACAGCAATCAACCCCTCAA**

16222 **CCTCAACTATCACACATCAACTGCAACTCCAAAGCCACCCCTCACCCACTAGGATACCAACAACCTACCACCCCTTAACAGTACATAGTACATAAAGCCATTACCGTACATAGCACATTACAGTCAAATCCCTTCTCGTCCCATGGATGACCCCTCAGATAGGGGTCCCTTGACCACCATCCTCC** 16411  
CCTCAACTATCACACATCAACTGCAACTCCAAAGCCACCCCTCACCCACTAGGATACCAACAACCTACCACCCCTTAACAGTACATAGTACATAAAGCCATTACCGTACATAGCACATTACAGTCAAATCCCTTCTCGTCCCATGGATGACCCCTCAGATAGGGGTCCCTTGACCACCATCCTCC AAC1  
CCTCAACTATCACACATCAACTGCAACTCCAAAGCCACCCCTCACCCACTAGGATACCAACAACCTACCACCCCTTAACAGTACATAGTACATAAAGCCATTACCGTACATAGCACATTACAGTCAAATCCCTTCTCGTCCCATGGATGACCCCTCAGATAGGGGTCCCTTGACCACCATCCTCC AAC2  
**Cons. CCTCAACTATCACACATCAACTGCAACTCCAAAGCCACCCCTCACCCACTAGGATACCAACAACCTACCACCCCTTAACAGTACATAGTACATAAAGCCATTACCGTACATAGCACATTACAGTCAAATCCCTTCTCGTCCCATGGATGACCCCTCAGATAGGGGTCCCTTGACCACCATCCTCC** AAC2

16381 **TCAGATAGGGTCCCTTGACCACCATCCTCCGTGAATCAATATCCCGCACAGAGTGCTACTCTCCTCGTCCGGGCCATAACACTTGGGGGTAGCTAAAGTGAAC** 16489  
TCAGATAGGGTCCCTTGACCACCATCCTCCGTGAATCAATATCCCGCACAGAGTGCTACTCTCCTCGTCCGGGCCATAACACTTGGGGGTAGCTAAAGTGAAC AAC1  
TCAGATAGGGTCCCTTGACCACCATCCTCCGTGAATCAATATCCCGCACAGAGTGCTACTCTCCTCGTCCGGGCCATAACACTTGGGGGTAGCTAAAGTGAAC AAC2  
**Cons. TCAGATAGGGTCCCTTGACCACCATCCTCCGTGAATCAATATCCCGCACAGAGTGCTACTCTCCTCGTCCGGGCCATAACACTTGGGGGTAGCTAAAGTGAAC**

16471 **GGGTAGCTAAAGTGAACGTATCCGACATCTGGTTCCTACTTTCAGGGTCAATAAGCCATAAAGCCACACGTTCCCTTAAATAAGACATCAGATGGATCACAGTCTATCACCCATTAAACCCTCAC** 33  
GGGTAGCTAAAGTGAACGTATCCGACATCTGGTTCCTACTTTCAGGGTCAATAAGCCATAAAGCCACACGTTCCCTTAAATAAGACATCAGATGGATCACAGTCTATCACCCATTAAACCCTCAC AAC1  
GGGTAGCTAAAGTGAACGTATCCGACATCTGGTTCCTACTTTCAGGGTCAATAAGCCATAAAGCCACACGTTCCCTTAAATAAGACATCAGATGGATCACAGTCTATCACCCATTAAACCCTCAC AAC3  
**Cons. GGGTAGCTAAAGTGAACGTATCCGACATCTGGTTCCTACTTTCAGGGTCAATAAGCCATAAAGCCACACGTTCCCTTAAATAAGACATCAGATGGATCACAGTCTATCACCCATTAAACCCTCAC**

16552 **AAATAAGACATCAGATGGATCAGAGTCTATCACCCATTAAACCCTCACGGGAGCTCTCCATGCATTTGGTATTTTCGCTGGGGGGTATGCACGGATAGCATTGCGAGACGCTGGAGCCGGAGCACCCCTATGCGCAGTATCTGTCTTTGATTCTGCCTCATCTTATT** 155  
AAATAAGACATCAGATGGATCAGAGTCTATCACCCATTAAACCCTCACGGGAGCTCTCCATGCATTTGGTATTTTCGCTGGGGGGTATGCACGGATAGCATTGCGAGACGCTGGAGCCGGAGCACCCCTATGCGCAGTATCTGTCTTTGATTCTGCCTCATCTTATT AAC1  
AAATAAGACATCAGATGGATCAGAGTCTATCACCCATTAAACCCTCACGGGAGCTCTCCATGCATTTGGTATTTTCGCTGGGGGGTATGCACGGATAGCATTGCGAGACGCTGGAGCCGGAGCACCCCTATGCGCAGTATCTGTCTTTGATTCTGCCTCATCTTATT AAC2  
AAATAAGACATCAGATGGATCAGAGTCTATCACCCATTAAACCCTCACGGGAGCTCTCCATGCATTTGGTATTTTCGCTGGGGGGTATGCACGGATAGCATTGCGAGACGCTGGAG AAC3  
**Cons. AAATAAGACATCAGATGGATCAGAGTCTATCACCCATTAAACCCTCACGGGAGCTCTCCATGCATTTGGTATTTTCGCTGGGGGGTATGCACGGATAGCATTGCGAGACGCTGGAGCCGGAGCACCCCTATGCGCAGTATCTGTCTTTGATTCTGCCTCATCTTATT**

133 **TTTGATTCCTGCCTCATCTTATTATTCGCACTACGTTCAATATTACAGGCGAACATACTACTAAAGTGTGTTAATTAATTAATGCTTGTAGGACATAATAAACAATTGAATGTCTGCACAGCCGCTTT** 267  
TTTGATTCCTGCCTCATCTTATTATTCGCACTACGTTCAATATTACAGGCGAACATACTACTAAAGTGTGTTAATTAATTAATGCTTGTAGGACATAATAAACAATTGAATGTCTGCACAGCCGCTTT AAC1  
TTTGATTCCTGCCTCATCTTATTATTCGCACTACGTTCAATATTACAGGCGAACATACTACTAAAGTGTGTTAATTAATTAATGCTTGTAGGACATAATAAACAATTGAATGTCTGCACAGCCGCTTT AAC3  
**Cons. TTTGATTCCTGCCTCATCTTATTATTCGCACTACGTTCAATATTACAGGCGAACATACTACTAAAGTGTGTTAATTAATTAATGCTTGTAGGACATAATAAACAATTGAATGTCTGCACAGCCGCTTT**

241 **ACAATTGAATGTCTGCACAGCCACTTCCACACAGACATCATAACAAAAAATTTCCACCAAAACCCCTCCCGCTTCTGGCCACAGCACTTAAACACATCTCTGCCAAACCCCAAAAAACAAGA** 367  
ACAATTGAATGTCTGCACAGCCACTTCCACACAGACATCATAACAAAAAATTTCCACCAAAACCCCTCCCGCTTCTGGCCACAGCACTTAAACACATCTCTGCCAAACCCCAAAAAACAAGA AAC2  
ACAATTGAATGTCTGCACAGCCACTTCCACACAGACATCATAACAAAAAATTTCCACCAAAACCCCTCCCGCTTCTGGCCACAGCACTTAAACACATCTCTGCCAAACCCCAAAAAACAAGA AAC3  
**Cons. ACAATTGAATGTCTGCACAGCCACTTCCACACAGACATCATAACAAAAAATTTCCACCAAAACCCCTCCCGCTTCTGGCCACAGCACTTAAACACATCTCTGCCAAACCCCAAAAAACAAGA**

339 **ACATCTCTGCCAAACCCCAAAAAACAAGAACCCTAACACCAGCCTAACAGATTTCAAATTTTATCTTTTGGCGGTATGCACTTTAAACAGTACACCCCA** 439  
ACATCTCTGCCAAACCCCAAAAAACAAGAACCCTAACACCAGCCTAACAGATTTCAAATTTTATCTTTTGGCGGTATGCACTTTAAACAGTACACCCCA AAC2  
ACATCTCTGCCAAACCCCAAAAAACAAGAACCCTAACACCAGCCTAACAGATTTCAAATTTTATCTTTTGGCGGTATGCACTTTAAACAGTACACCCCA AAC3  
**Cons. ACATCTCTGCCAAACCCCAAAAAACAAGAACCCTAACACCAGCCTAACAGATTTCAAATTTTATCTTTTGGCGGTATGCACTTTAAACAGTACACCCCA**

426 **ACAGTACACCCCAACTAACACATTTATTTCCCTCCCACTCCCATACTACTAATCTCATCAATAACCCCGCCATCTACCCAGCACACACACACCGCTGTAAACCCATACCCCGAACCAACCCCAAGACACCCCCACAGTTTATGTAGCTTACCTC** 594  
ACAGTACACCCCAACTAACACATTTATTTCCCTCCCACTCCCATACTACTAATCTCATCAATAACCCCGCCATCTACCCAGCACACACACACCGCTGTAAACCCATACCCCGAACCAACCCCAAGACACCCCCACAGTTTATGTAGCTTACCTC AAC1  
ACAGTACACCCCAACTAACACATTTATTTCCCTCCCACTCCCATACTACTAATCTCATCAATAACCCCGCCATCTACCCAGCACACACACACCGCTGTAAACCCATACCCCGAACCAACCCCAAGACACCCCCACAGTTTATGTAGCTTACCTC AAC3  
**Cons. ACAGTACACCCCAACTAACACATTTATTTCCCTCCCACTCCCATACTACTAATCTCATCAATAACCCCGCCATCTACCCAGCACACACACACCGCTGTAAACCCATACCCCGAACCAACCCCAAGACACCCCCACAGTTTATGTAGCTTACCTC**

<sup>1</sup>The first lines in bold indicate the Cambridge Reference Sequence (NCBI Reference Sequence: NC\_012920.1)

Cons.: Consensus sequence

3. II/52

16009 TTAACATATTCTCTGTTCTTTCATGGGGAAGCAGATTTGGGTACCACCAAGTATTGACTCACCATCAACAACCGCTATGTATTTTCGTACATTACTGCCAGCCACCATGAATATTGTACG 16129  
TTAAACTATTCTCTGTTCTTTCATGGGGAAGCAGATTTGGGTACCACCAAGTATTGACTCACCATCAACAACCGCTATGTATTTTCGTACATTACTGCCAGCCACCATGAATATTGCAGG II 52T3  
TTAAACTATTCTCTGTTCTTTCATGGGGAAGCAGATTTGGGTACCACCAAGTATTGACTCACCATCAACAACCGCTATGTATTTTCGTACATTACTGCCAGCCACCATGAATATTGCAGG II 52T6\*  
Cons. TTAACATATTCTCTGTTCTTTCATGGGGAAGCAGATTTGGGTACCACCAAGTATTGACTCACCATCAACAACCGCTATGTATTTTCGTACATTACTGCCAGCCACCATGAATATTGCAGG

16113 AGCCACCATGAATATTGTCACGGTACCATAAATACTTGACCACCTGTAGTACATAAAAAACCAATCCACATCAAAAACCCCTCCCATGCTTACAAGCAAGTACAGCAATCAACCCCTCAA 16227  
AGCCACCATGAATATTGTCACGGTACCATAAATACTTGACCACCTGTAGTACATAAAAAACCAATCCACATCAAAAACCCCTCCCATGCTTACAAGCAAGTACAGCAATCAACCCCTCAA II 52T2  
AGCCACCATGAATATTGTCACGGTACCATAAATACTTGACCACCTGTAGTACATAAAAAACCAATCCACATCAAAAACCCCTCCCATGCTTACAAGCAAGTACAGCAATCAACCCCTCAA II 52T6\*  
AGCCACCATGAATATTGTCACGGTACCATAAATACTTGACCACCTGTAGTACATAAAAAACCAATCCACATCAAAAACCCCTCCCATGCTTACAAGCAAGTACAGCAATCAACCCCTCAA II 52T6\*  
AGCCACCATGAATATTGTCACGGTACCATAAATACTTGACCACCTGTAGTACATAAAAAACCAATCCACATCAAAAACCCCTCCCATGCTTACAAGCAAGTACAGCAATCAACCCCTCAA II 52F2\*\*  
Cons. AGCCACCATGAATATTGTCACGGTACCATAAATACTTGACCACCTGTAGTACATAAAAAACCAATCCACATCAAAAACCCCTCCCATGCTTACAAGCAAGTACAGCAATCAACCCCTCAA

16222 CCTCAACTATCACACATCAACTGCAACTCCAAAGCCACCCCTCACCACCTAGGATACCAACAACCTACCACCCCTAACAGTACATAGTACATAAAGCCATTACCGTACATAGCACCATTACAGTCAAATCCCTTCTCGTCCCATGGATGACCCCCCTCAGATAGGGGTCCCTTGACCACCATCCCTCC 16411  
CCTCAACTATCACACATCAACTGCAACTCCAAAGCCACCCCTCACCACCTAGGATACCAACAACCTACCACCCCTAACAGTACATAGTACATAAAGCCATTACCGTACATAGCACCATTACAGTCAAATCCCTTCTCGTCCCATGGATGACCCCCCTCAGATAGGGGTCCCTTGACCACCATCCCTCC II 52T2  
CCTCAACTATCACACATCAACTGCAACTCCAAAGCCACCCCTCACCACCTAGGATACCAACAACCTACCACCCCTAACAGTACATAGTACATAAAGCCATTACCGTACATAGCACCATTACAGTCAAATCCCTTCTCGTCCCATGGATGACCCCCCTCAGATAGGGGTCCCTTGACCACCATCCCTCC II 52T6\*  
CCTCAACTATCACACATCAACTGCAACTCCAAAGCCACCCCTCACCACCTAGGATACCAACAACCTACCACCCCTAACAGTACATAGTACATAAAGCCATTACCGTACATAGCACCATTACAGTCAAATCCCTTCTCGTCCCATGGATGACCCCCCTCAGATAGGGGTCCCTTGACCACCATCCCTCC II 52T6\*  
Cons. CCTCAACTATCACACATCAACTGCAACTCCAAAGCCACCCCTCACCACCTAGGATACCAACAACCTACCACCCCTAACAGTACATAGTACATAAAGCCATTACCGTACATAGCACCATTACAGTCAAATCCCTTCTCGTCCCATGGATGACCCCCCTCAGATAGGGGTCCCTTGACCACCATCCCTCC

16381 TCAGATAGGGGTCCCTTGACCACCATCCCTCGTGAAATCAATATCCCGCACAAGAGTGTACTCTCTCCGCTCCGGGCCATAAACACTTGGGGGTAGCTAAAGTGAAC 16489  
TCAGATAGGGGTCCCTTGACCACCATCCCTCGTGAAATCAATATCCCGCACAAGAGTGTACTCTCTCCGCTCCGGGCCATAAACACTTGGGGGTAGCTAAAGTGAAC II 52T2  
TCAGATAGGGGTCCCTTGACCACCATCCCTCGTGAAATCAATATCCCGCACAAGAGTGTACTCTCTCCGCTCCGGGCCATAAACACTTGGGGGTAGCTAAAGTGAAC II 52T6\*  
TCAGATAGGGGTCCCTTGACCACCATCCCTCGTGAAATCAATATCCCGCACAAGAGTGTACTCTCTCCGCTCCGGGCCATAAACACTTGGGGGTAGCTAAAGTGAAC II 52F2\*\*  
Cons. TCAGATAGGGGTCCCTTGACCACCATCCCTCGTGAAATCAATATCCCGCACAAGAGTGTACTCTCTCCGCTCCGGGCCATAAACACTTGGGGGTAGCTAAAGTGAAC

16471 GGGGTAGCTAAAGTGAACGTGTATCCGACATCTGGTTCCTACTTCAGGGTCATAAAGCCATAAAGTACCCACAGCTTCCCTTAAATAAGACATCAGATGGATCACAGGTTCTATCACCCCTATTAACCACTCAC 33  
GGGTAGCTAAAGTGAACGTGTATCCGACATCTGGTTCCTACTTCAGGGTCATAAAGCCATAAAGTACCCACAGCTTCCCTTAAATAAGACATCAGATGGATCACAGGTTCTATCACCCCTATTAACCACTCAC II 52T3  
GGGTAGCTAAAGTGAACGTGTATCCGACATCTGGTTCCTACTTCAGGGTCATAAAGCCATAAAGTACCCACAGCTTCCCTTAAATAAGACATCAGATGGATCACAGGTTCTATCACCCCTATTAACCACTCAC II 52T6\*  
GGGTAGCTAAAGTGAACGTGTATCCGACATCTGGTTCCTACTTCAGGGTCATAAAGCCATAAAGTACCCACAGCTTCCCTTAAATAAGACATCAGATGGATCACAGGTTCTATCACCCCTATTAACCACTCAC II 52F2\*\*  
Cons. GGGGTAGCTAAAGTGAACGTGTATCCGACATCTGGTTCCTACTTCAGGGTCATAAAGCCATAAAGTACCCACAGCTTCCCTTAAATAAGACATCAGATGGATCACAGGTTCTATCACCCCTATTAACCACTCAC

16552 AAATAAGACATCAGATGGATCAGAGGTCATACCCCTATTAACCACTCAGCGGAGCTCTCCATGCATTTGGTATTTTCGCTGGGGGGTATGCACGGATAGCATTGCGAGACGCTGGAGCCGGAGCACCCTATGTCGCAGTATCTGTCTTTGATTCTGCCTCATCTTATT 155  
AAATAAGACATCAGATGGATCAGAGGTCATACCCCTATTAACCACTCAGCGGAGCTCTCCATGCATTTGGTATTTTCGCTGGGGGGTATGCACGGATAGCATTGCGAGACGCTGGAGCCGGAGCACCCTATGTCGCAGTATCTGTCTTTGATTCTGCCTCATCTTATT II 52T3  
AAATAAGACATCAGATGGATCAGAGGTCATACCCCTATTAACCACTCAGCGGAGCTCTCCATGCATTTGGTATTTTCGCTGGGGGGTATGCACGGATAGCATTGCGAGACGCTGGAGCCGGAGCACCCTATGTCGCAGTATCTGTCTTTGATTCTGCCTCATCTTATT II 52T6\*  
AAATAAGACATCAGATGGATCAGAGGTCATACCCCTATTAACCACTCAGCGGAGCTCTCCATGCATTTGGTATTTTCGCTGGGGGGTATGCACGGATAGCATTGCGAGACGCTGGAGCCGGAGCACCCTATGTCGCAGTATCTGTCTTTGATTCTGCCTCATCTTATT II 52F2\*\*  
Cons. AAATAAGACATCAGATGGATCAGAGGTCATACCCCTATTAACCACTCAGCGGAGCTCTCCATGCATTTGGTATTTTCGCTGGGGGGTATGCACGGATAGCATTGCGAGACGCTGGAGCCGGAGCACCCTATGTCGCAGTATCTGTCTTTGATTCTGCCTCATCTTATT

133 TTTGATTCTGCCTCATCTCTATTATTTATCGCACCTACGTTCAATATTACAGGCGAACAATACTTAAAGTGTGTTAAATTAATTAATGCTTTGAGGACATAATAAACAATTGAATGCTGCACAGCCGCTTT 267  
TTTGATTCTGCCTCATCTCTATTATTTATCGCACCTACGTTCAATATTACAGGCGAACAATACTTAAAGTGTGTTAAATTAATTAATGCTTTGAGGACATAATAAACAATTGAATGCTGCACAGCCGCTTT II 52T4  
TTTGATTCTGCCTCATCTCTATTATTTATCGCACCTACGTTCAATATTACAGGCGAACAATACTTAAAGTGTGTTAAATTAATTAATGCTTTGAGGACATAATAAACAATTGAATGCTGCACAGCCGCTTT II 52T6\*  
TTTGATTCTGCCTCATCTCTATTATTTATCGCACCTACGTTCAATATTACAGGCGAACAATACTTAAAGTGTGTTAAATTAATTAATGCTTTGAGGACATAATAAACAATTGAATGCTGCACAGCCGCTTT II 52T6\*  
TTTGATTCTGCCTCATCTCTATTATTTATCGCACCTACGTTCAATATTACAGGCGAACAATACTTAAATTAATTAATGCTTTGAGGACATAATAAACAATTGAATGCTGCACAGCCGCTTT II 52F2\*\*  
Cons. TTTGATTCTGCCTCATCTCTATTATTTATCGCACCTACGTTCAATATTACAGGCGAACAATACTTAAAGTGTGTTAAATTAATTAATGCTTTGAGGACATAATAAACAATTGAATGCTGCACAGCCGCTTT

241 ACAATTGAATGCTGCACAGCCACTTCCACACAGACATCATAAACAATAAATTTCCACCAAAACCCCCCTCCCGCTTCTGGCCACAGCACTTAAACACATCTCTGCCAAACCCCAAAAACAAGA 367  
ACAATTGAATGCTGCACAGCCACTTCCACACAGACATCATAAACAATAAATTTCCACCAAAACCCCCCTCCCGCTTCTGGCCACAGCACTTAAACACATCTCTGCCAAACCCCAAAAACAAGA II 52T4  
ACAATTGAATGCTGCACAGCCACTTCCACACAGACATCATAAACAATAAATTTCCACCAAAACCCCCCTCCCGCTTCTGGCCACAGCACTTAAACACATCTCTGCCAAACCCCAAAAACAAGA II 52T6\*  
Cons. ACAATTGAATGCTGCACAGCCACTTCCACACAGACATCATAAACAATAAATTTCCACCAAAACCCCCCTCCCGCTTCTGGCCACAGCACTTAAACACATCTCTGCCAAACCCCAAAAACAAGA

339 ACATCTCTGCCAAACCCCAAAAACAAGAACCCTAACACCAGCCTAACAGATTTCAAATTTTATCTTTTGGCGGTATGCACCTTTTAAACAGTACACCCCA 439  
ACATCTCTGCCAAACCCCAAAAACAAGAACCCTAACACCAGCCTAACAGATTTCAAATTTTATCTTTTGGCGGTATGCACCTTTTAAACAGTACACCCCA II 52T4  
ACATCTCTGCCAAACCCCAAAAACAAGAACCCTAACACCAGCCTAACAGATTTCAAATTTTATCTTTTGGCGGTATGCACCTTTTAAACAGTACACCCCA II 52T6\*  
ACATCTCTGCCAAACCCCAAAAACAAGAACCCTAACACCAGCCTAACAGATTTCAAATTTTATCTTTTGGCGGTATGCACCTTTTAAACAGTACACCCCA II 52F2\*\*  
Cons. ACATCTCTGCCAAACCCCAAAAACAAGAACCCTAACACCAGCCTAACAGATTTCAAATTTTATCTTTTGGCGGTATGCACCTTTTAAACAGTACACCCCA

426 ACAGTACACCCCAACTAACACATTTATTTCCCTCCCACTCCCATACTACTAATCTCATCAATAACAACCCCGCCCATCTACCCAGCACACACACAGCGTGTAAACCCATACCCCGAACCAACCAACCCCAAAAGACACCCCCACAGTTTATGTAGCTTACCTC 594  
ACAGTACACCCCAACTAACACATTTATTTCCCTCCCACTCCCATACTACTAATCTCATCAATAACAACCCCGCCCATCTACCCAGCACACACACAGCGTGTAAACCCATACCCCGAACCAACCAACCCCAAAAGACACCCCCACAGTTTATGTAGCTTACCTC II 52T2  
ACAGTACACCCCAACTAACACATTTATTTCCCTCCCACTCCCATACTACTAATCTCATCAATAACAACCCCGCCCATCTACCCAGCACACACACAGCGTGTAAACCCATACCCCGAACCAACCAACCCCAAAAGACACCCCCACAGTTTATGTAGCTTACCTC II 52T6\*  
ACAGTACACCCCAACTAACACATTTATTTCCCTCCCACTCCCATACTACTAATCTCATCAATAACAACCCCGCCCATCTACCCAGCACACACACAGCGTGTAAACCCATACCCCGAACCAACCAACCCCAAAAGACACCCCCACAGTTTATGTAGCTTACCTC II 52T6\*  
ACAGTACACCCCAACTAACACATTTATTTCCCTCCCACTCCCATACTACTAATCTCATCAATAACAACCCCGCCCATCTACCCAGCACACACACAGCGTGTAAACCCATACCCCGAACCAACCAACCCCAAAAGACACCCCCACAGTTTATGTAGCTTACCTC II 52F2\*\*  
Cons. ACAGTACACCCCAACTAACACATTTATTTCCCTCCCACTCCCATACTACTAATCTCATCAATAACAACCCCGCCCATCTACCCAGCACACACACAGCGTGTAAACCCATACCCCGAACCAACCAACCCCAAAAGACACCCCCACAGTTTATGTAGCTTACCTC

<sup>1</sup>The first lines in bold indicate the Cambridge Reference Sequence (NCBI Reference Sequence: NC\_012920.1)  
\*Before DNA extraction, the bone powder was treated with additional 0.5% NaOCl for 7 minutes to remove the residual mitochondrial DNA contamination.  
\*\* Before DNA extraction, the bone powder was treated with additional 0.8% NaOCl for 7 minutes to remove the residual mitochondrial DNA contamination.  
Y = C or T; M = A or C; R = A or G  
Cons.: Consensus sequence
